# Supplementary material for: Domino Michael/Michael reaction catalyzed by switchable modularly designed organocatalysts
Source: Royal Society of Chemistry journal article supplement (doi:10.1039/d1ob01991k), 2021-12-06
Supplement: d1ob01991k1.pdf [file d1ob01991k1.pdf]

# **Domino Michael/Michael reaction catalyzed by switchable modularly designed organocatalysts**

**Ramarao Parella, Satish Jakkampudi, Pranjal Bora,  
Nagaraju Sakkani, and John C.-G. Zhao \***

Department of Chemistry  
University of Texas at San Antonio

## **Supporting Information**

### **Table of Contents**

|                                                                               |             |
|-------------------------------------------------------------------------------|-------------|
| <b>Determination of the Product Relative and Absolute Configuration .....</b> | <b>S-1</b>  |
| <b>Characterization Data for New Cinchona Alkaloid Derivatives .....</b>      | <b>S-3</b>  |
| <b>Copy of NMR Spectra.....</b>                                               | <b>S-9</b>  |
| <b>Copy of HPLC Chromatograms.....</b>                                        | <b>S-37</b> |

## Determination of the Product Relative and Absolute Configuration

The relative stereochemistry of the product was determined by COSY experiments and the coupling constants using compound **31** (please see Pages S-32-S-33 below for details).

The absolute stereochemistry of the domino Michael/Michael product was determined by comparing our product with that obtained with the Xu's catalytic system<sup>11b</sup> (Scheme S-1).

According to Xu report,<sup>11b</sup> the reaction of enal **12** with **2a** under the catalysis of (*R*)-**14** gave the domino Michael/Michael product **13** with the absolute stereochemistry of (**1*S*,2*S*,3*R*,4*R***) for the **newly formed four stereogenic centers** (Eq. 1, Scheme 1), which was assigned according to X-ray crystallography.<sup>11b</sup>

We conducted a similar reaction with enal **1a** and **2a** with (*R*)-**14** as the catalyst (Eq. 2, Scheme 1) under otherwise identical conditions. Accordingly, the domino Michael/Michael product we obtained should have totally opposite stereochemistry for these four stereogenic centers [i.e., (**1*R*,2*S*,3*S*,4*S***). Please note: The *R/S* designation is not totally flipped due to the removal of the 6-phenyl group]. According to the HPLC chromatograms, this product turned out to be the enantiomer of the major product in our study (Please see Page S-38 vs Page S-37 below), i.e., it is **ent-3a**, as shown in Eq. 2. Thus, the major enantiomer **3a** obtained in our study should have exactly the same absolute stereochemistry as that of compound **13** for the four stereogenic centers [i.e., (**1*S*,2*R*,3*R*,4*R***) for **3a**, Eq. 3]. These results are not surprising, since compound **13** and compound **3a** are both obtained from catalysts that are based on D-proline.

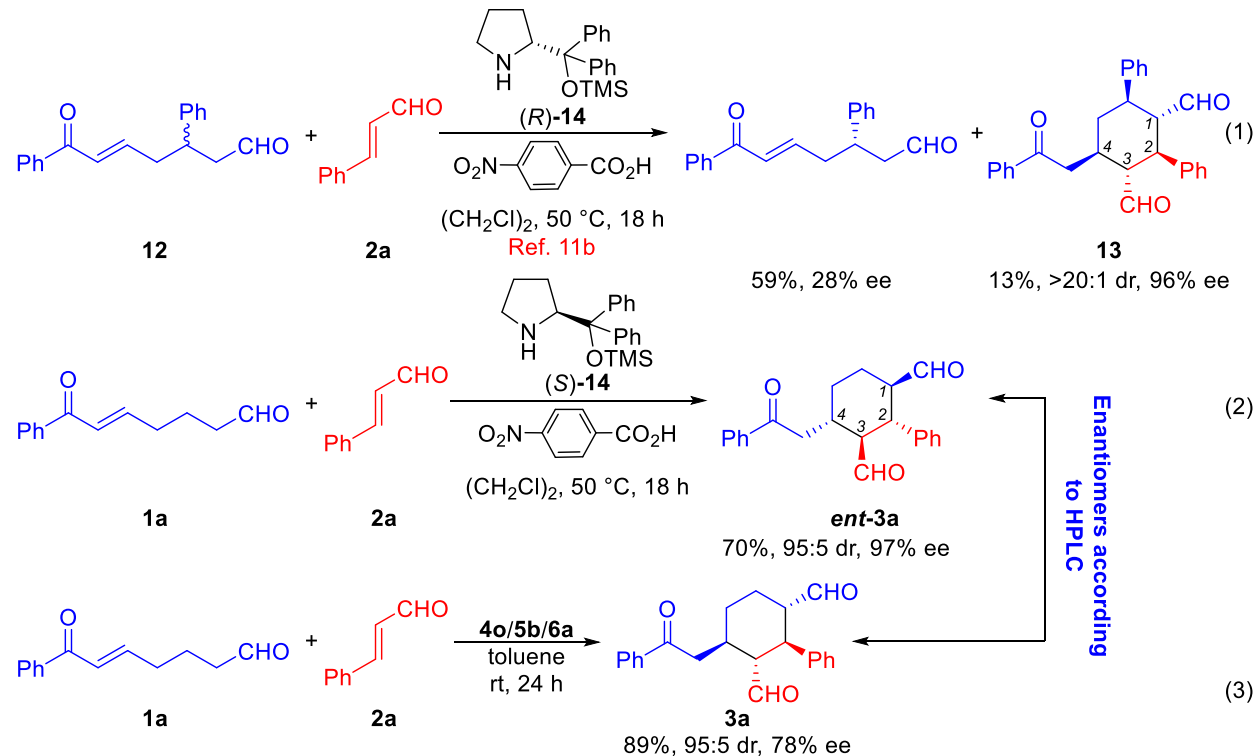

**Scheme S-1.** Determination of the absolute stereochemistry of the reaction product **3a**

## Experimental Procedure for the Synthesis of *ent*-3a Using Catalyst (*S*)-14<sup>11b</sup>

Compound *ent*-3a was synthesized from enonal 1a and enal 2a using exactly the same conditions reported in Ref. 11b (Table 1, entry 3 of Ref. 11b) so that the results are comparable: Under the protection of nitrogen, to a flame dried 5-mL round bottom flask with a magnetic stirring bar was added catalyst (*S*)-14 (6.5 mg, 0.020 mmol, 10 mol %) and 4-nitrobenzoic acid (1.7 mg, 0.010 mmol, 5 mol %). A solution of substrate 1a (40.4 mg, 0.20 mmol) in dry dichloroethane (1.0 mL) and *trans*-cinnamaldehyde (2a, 26.4 mg, 0.20 mmol) was added by syringe, respectively. Then the reaction mixture was stirred at 50 °C for 18 h. After the reaction was completed, the solvent was evaporated in a rotavapor under reduced pressure and the crude product obtained was purified by flash column chromatography using 70:30 hexane/EtOAc to give product *ent*-3a (46.8 mg, 70%). The dr of the product was determined to be 95:5 according to the NMR of the crude product. The HPLC analysis of this product revealed that it was the enantiomer of the major enantiomer obtained in our study (i.e., *ent*-3a) with an ee value of 97% (Please see Page S-38 vs Page S-37 below).

## Characterization Data for New Cinchona Alkaloid Derivatives

### 1-(4-Methoxyphenyl)-3-(4-((*S*)-(naphthalen-1-ylmethoxy)((*1S,2R,4S,5R*)-5-vinylquinuclidin-2-yl)methyl)quinolin-6-yl)thiourea (4d)

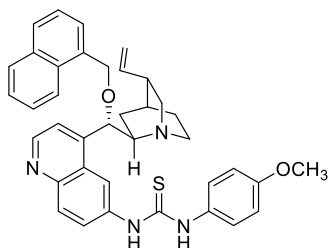

White solid; m.p. 118-119 °C;  $^1\text{H}$  NMR (500 MHz,  $\text{CDCl}_3$ )  $\delta$  9.52 (s, 1H), 8.76 (d,  $J = 4.3$  Hz, 1H), 8.61 (s, 1H), 8.29 (s, 1H), 7.89 (dd,  $J = 11.9, 8.6$  Hz, 4H), 7.62 (dd,  $J = 16.9, 9.8$  Hz, 2H), 7.55 – 7.42 (m, 5H), 6.75 (d,  $J = 8.1$  Hz, 2H), 5.53 (ddd,  $J = 17.0, 10.3, 6.6$  Hz, 1H), 4.98 (d,  $J = 10.9$  Hz, 1H), 4.76 (d,  $J = 10.5$  Hz, 1H), 4.58 (d,  $J = 17.1$  Hz, 1H), 3.88 (d,  $J = 36.7$  Hz, 2H), 3.76 (s, 3H), 3.68 (s, 1H), 3.07 (d,  $J = 78.0$  Hz, 2H), 2.35 (d,  $J = 5.1$  Hz, 1H), 2.08 (d,  $J = 14.3$  Hz, 1H), 1.84 – 1.60 (m, 3H), 1.28 (s, 1H), 1.10 (s, 1H), 0.96 – 0.78 (m, 1H).  $^{13}\text{C}$  NMR (126 MHz,  $\text{CDCl}_3$ )  $\delta$  180.1, 157.5, 148.9, 145.8, 137.5, 133.7, 132.8, 131.5, 130.4, 129.1, 128.6, 127.1, 126.6, 126.5, 126.0, 125.3, 123.9, 116.1, 113.9, 77.3, 69.8, 60.0, 55.3, 49.8, 48.9, 37.4, 29.7, 27.4.  $\nu_{\text{max}}$  (neat,  $\text{cm}^{-1}$ ): 2931, 1526, 1457, 1235, 1167, 1030, 828, 799, 778. HRMS (ESI,  $m/z$ ) calcd. for  $\text{C}_{38}\text{H}_{39}\text{N}_4\text{O}_2\text{S}$  ( $[\text{M}+\text{H}]^+$ ): 615.2788; found: 615.2780.

### 1-(Naphthalen-1-yl)-3-(4-((*S*)-(naphthalen-1-ylmethoxy)((*1S,2R,4S,5R*)-5-vinylquinuclidin-2-yl)methyl)quinolin-6-yl)thiourea (4e)

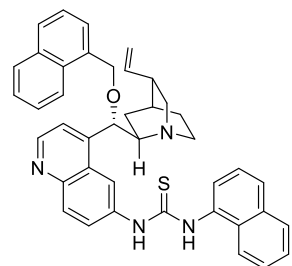

White solid; m.p. 105-106 °C;  $^1\text{H}$  NMR (500 MHz,  $\text{CDCl}_3$ )  $\delta$  9.13 (s, 1H), 8.82 (d,  $J = 4.4$  Hz, 1H), 8.49 (s, 1H), 8.23 (d,  $J = 7.6$  Hz, 1H), 8.12 (d,  $J = 7.3$  Hz, 1H), 8.03 (d,  $J = 8.8$  Hz, 1H), 7.96 (d,  $J = 4.3$  Hz, 1H), 7.91 – 7.79 (m, 4H), 7.75 (d,  $J = 6.5$  Hz, 1H), 7.49 (ddd,  $J = 30.3, 15.6, 7.5$  Hz, 8H), 7.28 (s, 1H), 5.59 (ddd,  $J = 17.2, 10.2, 7.0$  Hz, 1H), 5.07 (s, 1H), 4.94 (d,  $J = 11.2$  Hz, 1H), 4.80 (d,  $J = 10.4$  Hz, 1H), 4.68 (d,  $J = 17.2$  Hz, 1H), 3.56 (s, 2H), 3.01 (s, 1H), 2.84 (s, 1H), 2.27 (d,  $J = 6.9$  Hz, 1H), 2.10 (s, 1H), 1.77 (s, 1H), 1.66 – 1.48 (m, 2H), 1.28 (s, 1H), 1.16 (s, 1H).  $^{13}\text{C}$  NMR (126 MHz,  $\text{CDCl}_3$ )  $\delta$  181.7, 149.4, 146.4, 134.4, 133.6, 132.8, 131.4, 130.5, 129.9, 128.9, 128.6, 128.4, 127.2, 126.9, 126.6, 126.4, 125.9, 125.6, 125.2, 123.8, 122.7, 115.7, 69.8, 60.1, 49.7, 48.8, 38.0, 29.7, 27.5, 24.4.  $\nu_{\text{max}}$  (neat,  $\text{cm}^{-1}$ ): 2934, 1539, 1506,

1267, 1117, 1016, 765. HRMS (ESI, m/z) calcd. for C<sub>41</sub>H<sub>39</sub>N<sub>4</sub>OS ([M+H]<sup>+</sup>): 635.2839; found: 635.2831.

**1-(4-((S)-(Benzyloxy)((1S,2R,4S,5R)-5-vinylquinuclidin-2-yl)methyl)quinolin-6-yl)-3-phenylthiourea (4f)**

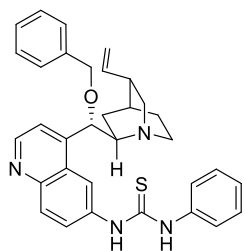

White solid; m.p. 90-91 °C; <sup>1</sup>H NMR (500 MHz, CDCl<sub>3</sub>) δ 9.68 (s, 1H), 8.73 (d, *J* = 4.4 Hz, 1H), 8.49 (s, 1H), 7.88 (d, *J* = 8.8 Hz, 1H), 7.78 (d, *J* = 8.9 Hz, 1H), 7.58 (d, *J* = 7.8 Hz, 2H), 7.52 (d, *J* = 7.3 Hz, 2H), 7.45 (dd, *J* = 15.2, 6.2 Hz, 3H), 7.39 (t, *J* = 7.3 Hz, 1H), 7.18 (t, *J* = 7.7 Hz, 2H), 7.08 (t, *J* = 7.4 Hz, 1H), 6.33 (s, 1H), 5.75 (ddd, *J* = 17.2, 10.5, 6.7 Hz, 1H), 5.03 (d, *J* = 10.5 Hz, 1H), 4.96 – 4.86 (m, 2H), 4.62 (d, *J* = 10.4 Hz, 1H), 4.10 (s, 1H), 3.87 (t, *J* = 9.0 Hz, 2H), 3.34 (dd, *J* = 20.5, 9.1 Hz, 1H), 3.08 (dd, *J* = 20.9, 9.7 Hz, 1H), 2.50 (dd, *J* = 16.2, 8.3 Hz, 1H), 2.20 (t, *J* = 11.6 Hz, 1H), 2.05 (d, *J* = 15.2 Hz, 1H), 1.89 (s, 1H), 1.82 – 1.64 (m, 2H), 1.08 (s, 1H). <sup>13</sup>C NMR (126 MHz, CDCl<sub>3</sub>) δ 179.8, 148.8, 145.5, 141.2, 138.5, 137.7, 136.8, 136.3, 130.1, 128.7, 128.5, 128.4, 128.3, 126.3, 125.2, 124.8, 124.2, 117.8, 117.0, 115.9, 72.1, 59.8, 49.7, 48.8, 37.2, 29.7, 27.3, 23.4, 18.7. *v*<sub>max</sub> (neat, cm<sup>-1</sup>): 3030, 2926, 1545, 1542, 1539, 1506, 1312, 1236, 1122, 1053, 752. HRMS (ESI, m/z) calcd. for C<sub>33</sub>H<sub>35</sub>N<sub>4</sub>OS ([M+H]<sup>+</sup>): 535.2526; found: 535.2528.

**1-(4-((S)-(Naphthalen-1-ylmethoxy)((1S,2R,4S,5R)-5-vinylquinuclidin-2-yl)methyl)quinolin-6-yl)-3-phenylurea (4h)**

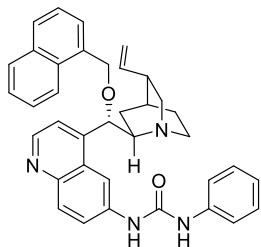

White solid; m.p. 121-123 °C; <sup>1</sup>H NMR (300 MHz, CDCl<sub>3</sub>) δ 9.37 (s, 1H), 8.65 (dd, *J* = 44.3, 20.3 Hz, 3H), 8.05 – 7.62 (m, 5H), 7.57 – 7.25 (m, 7H), 7.04 (t, *J* = 7.8 Hz, 2H), 6.84 (t, *J* = 7.4 Hz, 1H), 6.27 – 5.16 (m, 3H), 5.01 – 4.64 (m, 4H), 3.90 – 2.88 (m, 2H), 2.85 – 2.51 (m, 2H), 2.12 (dd, *J* = 16.4, 8.1 Hz, 2H), 1.71 (s, 1H), 1.55 – 0.97 (m, 3H). <sup>13</sup>C NMR (75 MHz, CDCl<sub>3</sub>) δ 153.6, 147.8, 144.9, 144.2, 139.3, 138.6, 138.3, 133.5, 133.1, 131.2, 130.8, 128.7, 128.6, 128.5, 126.9, 126.4, 126.2, 125.8, 125.2, 123.6, 123.3, 122.9, 119.4, 115.0, 69.5, 59.6, 49.6, 49.1, 39.1, 27.7, 25.5. *v*<sub>max</sub> (neat, cm<sup>-1</sup>): 2934, 1595, 1568, 1524, 1441, 1202, 791, 668. HRMS (ESI, m/z) calcd. for C<sub>37</sub>H<sub>37</sub>N<sub>4</sub>O<sub>2</sub> ([M+H]<sup>+</sup>): 569.2911; found: 569.2899.

**1-(4-((S)-(Benzyloxy)((1S,2R,4S,5R)-5-vinylquinuclidin-2-yl)methyl)quinolin-6-yl)-3-phenylurea (4j)**

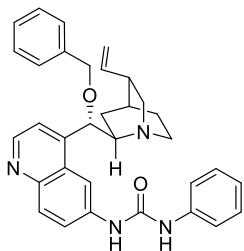

White solid; m.p. 114-116 °C;  $^1\text{H}$  NMR (500 MHz,  $\text{CDCl}_3$ )  $\delta$  8.77 (d,  $J = 4.4$  Hz, 2H), 8.52 (s, 1H), 8.26 (s, 1H), 7.94 (d,  $J = 9.0$  Hz, 1H), 7.57 – 7.44 (m, 2H), 7.32 (dd,  $J = 7.8, 6.0$  Hz, 4H), 7.28 (s, 1H), 7.12 (t,  $J = 7.8$  Hz, 2H), 6.92 (t,  $J = 7.4$  Hz, 1H), 5.95 (ddd,  $J = 17.4, 10.0, 7.7$  Hz, 1H), 5.45 (s, 1H), 4.99 (t,  $J = 13.1$  Hz, 2H), 4.56 (s, 1H), 4.43 – 4.28 (m, 2H), 3.38 (s, 1H), 3.11 (s, 1H), 3.00 – 2.82 (m, 2H), 2.71 (dd,  $J = 14.9, 6.1$  Hz, 1H), 2.27 – 2.06 (m, 2H), 1.73 (s, 1H), 1.58 – 1.37 (m, 2H), 1.26 (dd,  $J = 26.6, 19.6$  Hz, 1H).  $^{13}\text{C}$  NMR (126 MHz,  $\text{CDCl}_3$ )  $\delta$  153.7, 148.2, 145.6, 144.9, 140.3, 138.3, 137.7, 137.6, 130.6, 128.9, 128.3, 127.8, 127.7, 127.2, 123.4, 120.1, 114.6, 71.4, 59.9, 49.8, 49.3, 39.8, 28.1, 26.2.  $\nu_{\text{max}}$  (neat,  $\text{cm}^{-1}$ ): 2939, 2859, 1595, 1545, 1525, 1515, 1205, 1026, 828, 743. HRMS (ESI,  $m/z$ ) calcd. for  $\text{C}_{33}\text{H}_{35}\text{N}_4\text{O}_2$  ( $[\text{M}+\text{H}]^+$ ): 519.2755; found: 519.2741.

**1-(4-((S)-Butoxy)((1S,2R,4S,5R)-5-vinylquinuclidin-2-yl)methyl)quinolin-6-yl)-3-phenylthiourea (4l)**

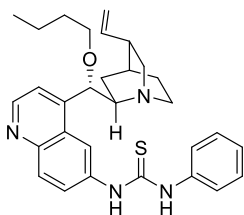

White solid; m.p. 79-81 °C;  $^1\text{H}$  NMR (500 MHz,  $\text{CDCl}_3$ )  $\delta$  9.46 (s, 1H), 8.74 (d,  $J = 4.4$  Hz, 1H), 8.34 (s, 1H), 7.91 – 7.81 (m, 2H), 7.48 (dd,  $J = 7.7, 1.6$  Hz, 2H), 7.38 (d,  $J = 4.4$  Hz, 1H), 7.18 (t,  $J = 7.7$  Hz, 2H), 7.08 (t,  $J = 7.4$  Hz, 1H), 5.99 (ddd,  $J = 17.5, 10.4, 7.4$  Hz, 1H), 5.77 (s, 1H), 5.22 – 5.09 (m, 2H), 3.82 (s, 1H), 3.68 – 3.37 (m, 4H), 3.18 (t,  $J = 11.7$  Hz, 1H), 2.93 (dt,  $J = 12.7, 9.3$  Hz, 1H), 2.42 (dd,  $J = 17.4, 8.6$  Hz, 1H), 2.24 – 2.12 (m, 1H), 1.84 (dt,  $J = 5.2, 2.4$  Hz, 1H), 1.76 – 1.34 (m, 6H), 1.17 – 1.01 (m, 1H), 0.96 (t,  $J = 7.4$  Hz, 3H).  $^{13}\text{C}$  NMR (126 MHz,  $\text{CDCl}_3$ )  $\delta$  179.8, 149.1, 145.8, 143.2, 138.1, 137.9, 130.3, 128.8, 126.6, 125.7, 125.4, 124.4, 118.0, 116.4, 116.3, 69.6, 59.8, 49.8, 49.2, 38.3, 32.1, 27.6, 24.4, 19.5, 13.9.  $\nu_{\text{max}}$  (neat,  $\text{cm}^{-1}$ ): 2932, 2873, 1539, 1506, 1517, 1236, 1115, 828, 754, 693. HRMS (ESI,  $m/z$ ) calcd. for  $\text{C}_{30}\text{H}_{37}\text{N}_4\text{OS}$  ( $[\text{M}+\text{H}]^+$ ): 501.2683; found: 501.2671.

**1-(4-((*R*)-(Naphthalen-1-ylmethoxy)((1*S*,2*S*,4*S*,5*R*)-5-vinylquinuclidin-2-yl)methyl)quinolin-6-yl)-3-phenylthiourea (4o)**

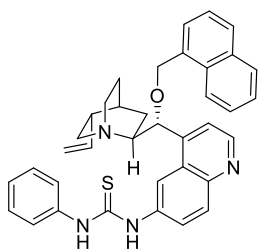

White solid; m.p. 116-118 °C;  $^1\text{H}$  NMR (500 MHz,  $\text{CDCl}_3$ )  $\delta$  8.81 (d,  $J = 4.4$  Hz, 1H), 8.58 (s, 1H), 8.07 – 7.96 (m, 3H), 7.90 – 7.80 (m, 2H), 7.61 – 7.41 (m, 8H), 7.25 (t,  $J = 7.7$  Hz, 2H), 7.14 (s, 1H), 5.64 (ddd,  $J = 17.3, 10.0, 7.6$  Hz, 1H), 5.05 – 4.91 (m, 4H), 3.61 (d,  $J = 72.5$  Hz, 2H), 3.23 – 2.97 (m, 2H), 2.81 (d,  $J = 11.4$  Hz, 1H), 2.39 (s, 1H), 1.86 (t,  $J = 44.9$  Hz, 3H), 1.55 (s, 2H), 1.29 (s, 1H).  $^{13}\text{C}$  NMR (126 MHz,  $\text{CDCl}_3$ )  $\delta$  179.9, 149.3, 146.2, 143.7, 139.3, 137.8, 137.4, 133.6, 132.9, 131.2, 130.6, 129.1, 128.8, 128.7, 126.9, 126.4, 126.2, 126.1, 125.3, 124.7, 123.4, 116.0, 69.5, 60.4, 55.8, 43.7, 38.5, 29.7, 27.3, 26.0.  $\nu_{\text{max}}$  (neat,  $\text{cm}^{-1}$ ): 2934, 2858, 2375, 1539, 1523, 1516, 1317, 1236, 1070, 751, 694. HRMS (ESI,  $m/z$ ) calcd. for  $\text{C}_{37}\text{H}_{37}\text{N}_4\text{OS}$  ( $[\text{M}+\text{H}]^+$ ): 585.2683; found: 585.2668.

**1-(4-((*R*)-(Benzyloxy)((1*S*,2*S*,4*S*,5*R*)-5-vinylquinuclidin-2-yl)methyl)quinolin-6-yl)-3-phenylthiourea (4q)**

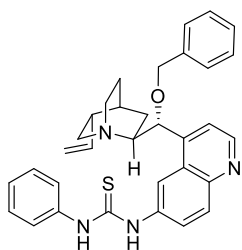

White solid; m.p. 95-97 °C;  $^1\text{H}$  NMR (500 MHz,  $\text{CDCl}_3$ )  $\delta$  9.32 (s, 1H), 8.81 (d,  $J = 4.4$  Hz, 1H), 8.49 (s, 1H), 7.94 (q,  $J = 8.9$  Hz, 2H), 7.48 (t,  $J = 6.7$  Hz, 3H), 7.42 – 7.31 (m, 5H), 7.27 (dd,  $J = 12.9, 5.2$  Hz, 2H), 7.15 (t,  $J = 7.4$  Hz, 1H), 5.83 (s, 1H), 5.66 (ddd,  $J = 17.4, 10.3, 7.4$  Hz, 1H), 4.97 (dd,  $J = 24.7, 13.7$  Hz, 2H), 4.56 (d,  $J = 10.9$  Hz, 1H), 4.46 (s, 1H), 3.75 (s, 1H), 3.53 (s, 1H), 3.22 (t,  $J = 11.7$  Hz, 1H), 3.10 (s, 1H), 2.90 (s, 1H), 2.44 (s, 1H), 1.92 (d,  $J = 35.8$  Hz, 3H), 1.60 (d,  $J = 38.8$  Hz, 2H).  $^{13}\text{C}$  NMR (126 MHz,  $\text{CDCl}_3$ )  $\delta$  179.9, 149.3, 146.1, 143.7, 139.4, 137.7, 137.2, 130.5, 129.1, 128.6, 128.0, 127.7, 126.9, 126.1, 125.8, 124.8, 118.5, 117.0, 116.0, 71.5, 60.4, 56.0, 43.9, 38.6, 29.7, 27.4, 26.1.  $\nu_{\text{max}}$  (neat,  $\text{cm}^{-1}$ ): 2931, 1549, 1539, 1506, 1496, 1312, 1238, 1025, 751, 726. HRMS (ESI,  $m/z$ ) calcd. for  $\text{C}_{33}\text{H}_{35}\text{N}_4\text{OS}$  ( $[\text{M}+\text{H}]^+$ ): 535.2526; found: 535.2517.

**1-(4-((*R*)-(Naphthalen-1-ylmethoxy)((1*S*,2*S*,4*S*,5*R*)-5-vinylquinuclidin-2-yl)methyl)quinolin-6-yl)-3-phenylurea (4s)**

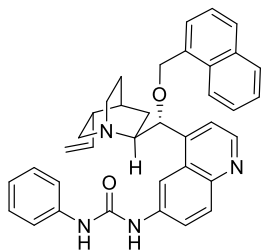

White solid; m.p. 111-113 °C;  $^1\text{H}$  NMR (500 MHz,  $\text{CDCl}_3$ )  $\delta$  8.94 (s, 1H), 8.75 (d,  $J = 4.5$  Hz, 1H), 8.66 (s, 1H), 8.40 (s, 1H), 7.98 (d,  $J = 9.0$  Hz, 1H), 7.80 (dd,  $J = 27.0, 8.2$  Hz, 3H), 7.58 – 7.34 (m, 8H), 7.12 (t,  $J = 7.7$  Hz, 2H), 6.90 (t,  $J = 7.2$  Hz, 1H), 5.66 (ddd,  $J = 17.5, 10.1, 7.7$  Hz, 1H), 5.16 (s, 1H), 4.96 – 4.74 (m, 4H), 3.39 (d,  $J = 7.3$  Hz, 1H), 3.21 (s, 1H), 3.02 (t,  $J = 11.4$  Hz, 1H), 2.72 – 2.51 (m, 2H), 2.20 (s, 1H), 1.96 – 1.51 (m, 4H), 1.41 (s, 1H).  $^{13}\text{C}$  NMR (126 MHz,  $\text{CDCl}_3$ )  $\delta$  153.7, 148.2, 145.9, 145.0, 141.4, 138.5, 138.4, 137.9, 133.5, 133.3, 131.1, 130.7, 129.1, 128.9, 128.6, 128.5, 127.3, 126.3, 125.8, 125.3, 123.4, 120.0, 114.4, 69.3, 60.6, 56.7, 43.0, 39.7, 29.7, 27.9, 27.7, 27.4.  $\nu_{\text{max}}$  (neat,  $\text{cm}^{-1}$ ): 2939, 1549, 1506, 1456, 1362, 1312, 1204, 1083, 748. HRMS (ESI,  $m/z$ ) calcd. for  $\text{C}_{37}\text{H}_{37}\text{N}_4\text{O}_2$  ( $[\text{M}+\text{H}]^+$ ): 569.2911; found: 569.2899.

**1-(3,5-Bis(trifluoromethyl)phenyl)-3-(4-((*R*)-(naphthalen-1-ylmethoxy))((1*S*,2*S*,4*S*,5*R*))-5-vinylquinuclidin-2-yl)methyl)quinolin-6-yl)urea (4t)**

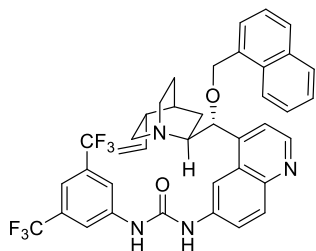

White solid; m.p. 127-129 °C;  $^1\text{H}$  NMR (500 MHz,  $\text{CDCl}_3$ )  $\delta$  8.95 (s, 1H), 8.77 (d,  $J = 4.4$  Hz, 1H), 8.59 (s, 1H), 7.98 (d,  $J = 9.0$  Hz, 1H), 7.94 – 7.72 (m, 5H), 7.63 – 7.31 (m, 7H), 5.74 – 5.60 (m, 1H), 4.99 – 4.78 (m, 4H), 4.45 (s, 1H), 3.39 (s, 1H), 3.21 (s, 1H), 3.02 (t,  $J = 11.7$  Hz, 1H), 2.68 (d,  $J = 11.9$  Hz, 1H), 2.53 (dd,  $J = 15.6, 7.6$  Hz, 1H), 2.23 (d,  $J = 19.1$  Hz, 1H), 1.99 – 1.17 (m, 6H).  $^{13}\text{C}$  NMR (126 MHz,  $\text{CDCl}_3$ )  $\delta$  152.8, 148.4, 145.6, 145.0, 140.9, 140.4, 137.2, 133.5, 133.0, 132.3, 132.1, 131.8, 131.5, 131.1, 130.7, 128.6, 127.1, 126.1, 125.8, 125.2, 124.2, 123.3, 123.0, 122.0, 118.3, 115.7, 114.7, 69.3, 60.4, 56.4, 43.0, 39.4, 27.5, 27.1.  $\nu_{\text{max}}$  (neat,  $\text{cm}^{-1}$ ): 2945, 1558, 1521, 1386, 1278, 1174, 791, 701, 681. HRMS (ESI,  $m/z$ ) calcd. for  $\text{C}_{39}\text{H}_{35}\text{F}_6\text{N}_4\text{O}_2$  ( $[\text{M}+\text{H}]^+$ ): 705.2659; found: 705.2640.

**1-(4-((*R*)-(Benzyloxy))((1*S*,2*S*,4*S*,5*R*))-5-vinylquinuclidin-2-yl)methyl)quinolin-6-yl)-3-phenylurea (4u)**



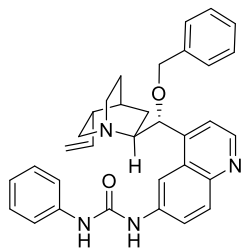

White solid; m.p. 98-100 °C;  $^1\text{H}$  NMR (500 MHz,  $\text{CDCl}_3$ )  $\delta$  9.39 (s, 1H), 8.74 (d,  $J = 4.4$  Hz, 1H), 8.53 (s, 1H), 8.26 (dd,  $J = 27.4, 6.4$  Hz, 1H), 8.18 – 8.08 (m, 1H), 7.96 (t,  $J = 8.3$  Hz, 1H), 7.46 (t,  $J = 5.5$  Hz, 3H), 7.40 – 7.34 (m, 4H), 7.15 (t,  $J = 7.9$  Hz, 2H), 6.92 (t,  $J = 7.4$  Hz, 1H), 6.03 (s, 1H), 5.57 (ddd,  $J = 17.2, 10.5, 6.8$  Hz, 1H), 5.00 (dd,  $J = 46.5, 13.8$  Hz, 2H), 4.62 (d,  $J = 11.0$  Hz, 1H), 4.51 (d,  $J = 11.0$  Hz, 1H), 3.91 (dd,  $J = 19.3, 8.4$  Hz, 1H), 3.60 (dd,  $J = 10.3, 7.9$  Hz, 1H), 3.35 (d,  $J = 9.1$  Hz, 2H), 3.10 – 2.99 (m, 1H), 2.60 – 2.48 (m, 1H), 2.11 (dd,  $J = 13.7, 7.4$  Hz, 1H), 2.05 – 1.92 (m, 2H), 1.73 (td,  $J = 7.1, 3.2$  Hz, 1H), 1.52 (dd,  $J = 8.1, 5.7$  Hz, 1H).  $^{13}\text{C}$  NMR (126 MHz,  $\text{CDCl}_3$ )  $\delta$  153.3, 147.8, 144.9, 141.1, 139.1, 139.0, 137.6, 136.8, 130.9, 128.7, 128.7, 128.2, 127.7, 125.9, 123.6, 122.6, 119.2, 117.7, 116.9, 109.1, 76.2, 71.6, 60.1, 54.9, 44.0, 37.5, 29.7, 26.9, 24.9.  $\nu_{\text{max}}$  (neat,  $\text{cm}^{-1}$ ): 2934, 1700, 1569, 1557, 1549, 1539, 1506, 1200, 1025, 1025, 745, 692. HRMS (ESI,  $m/z$ ) calcd. for  $\text{C}_{33}\text{H}_{35}\text{N}_4\text{O}_2$  ( $[\text{M}+\text{H}]^+$ ): 519.2755; found: 519.2740.

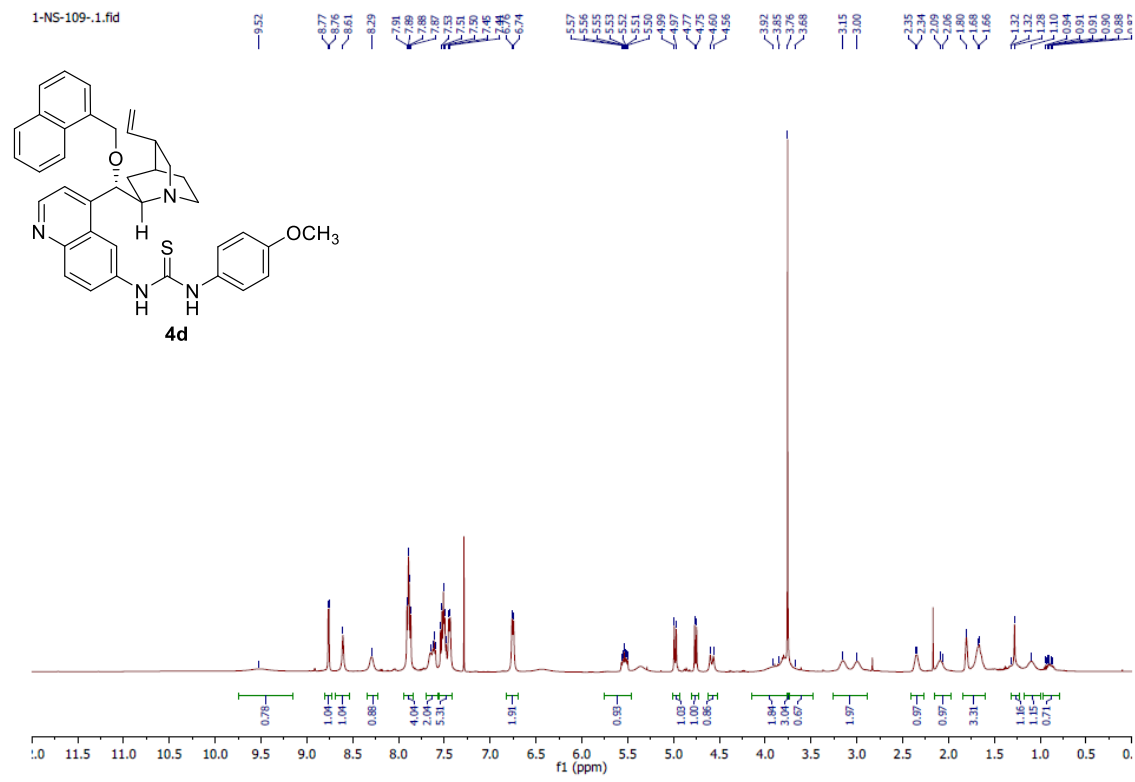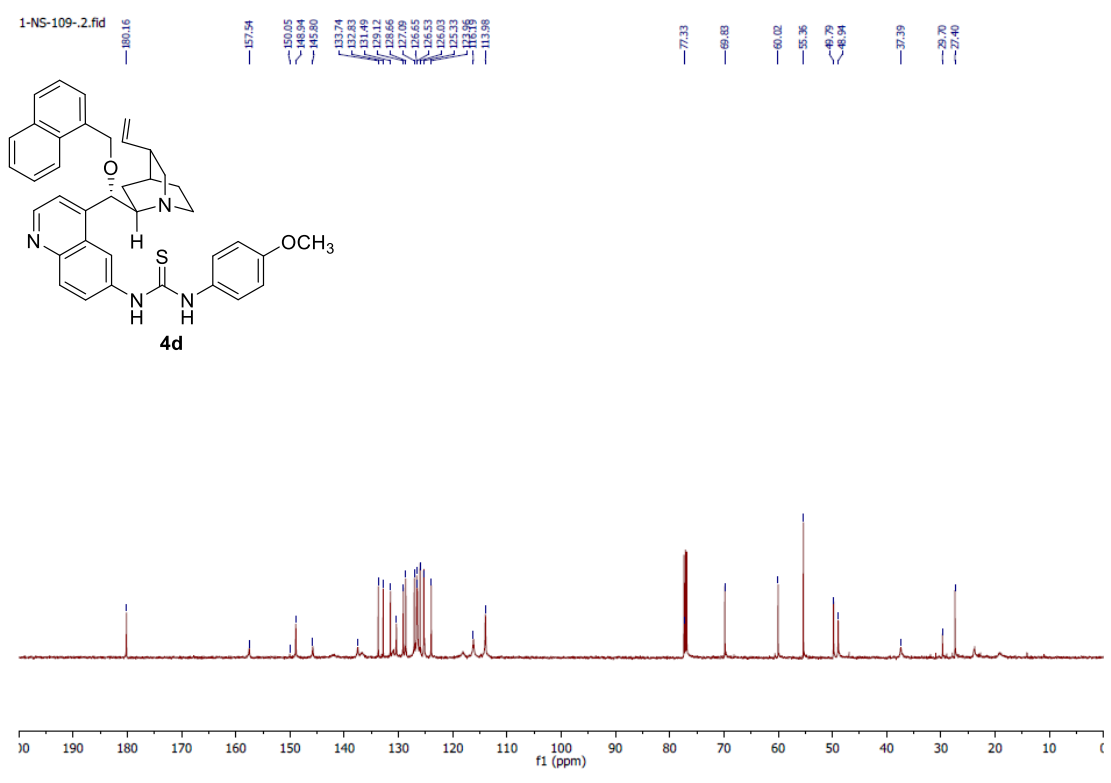

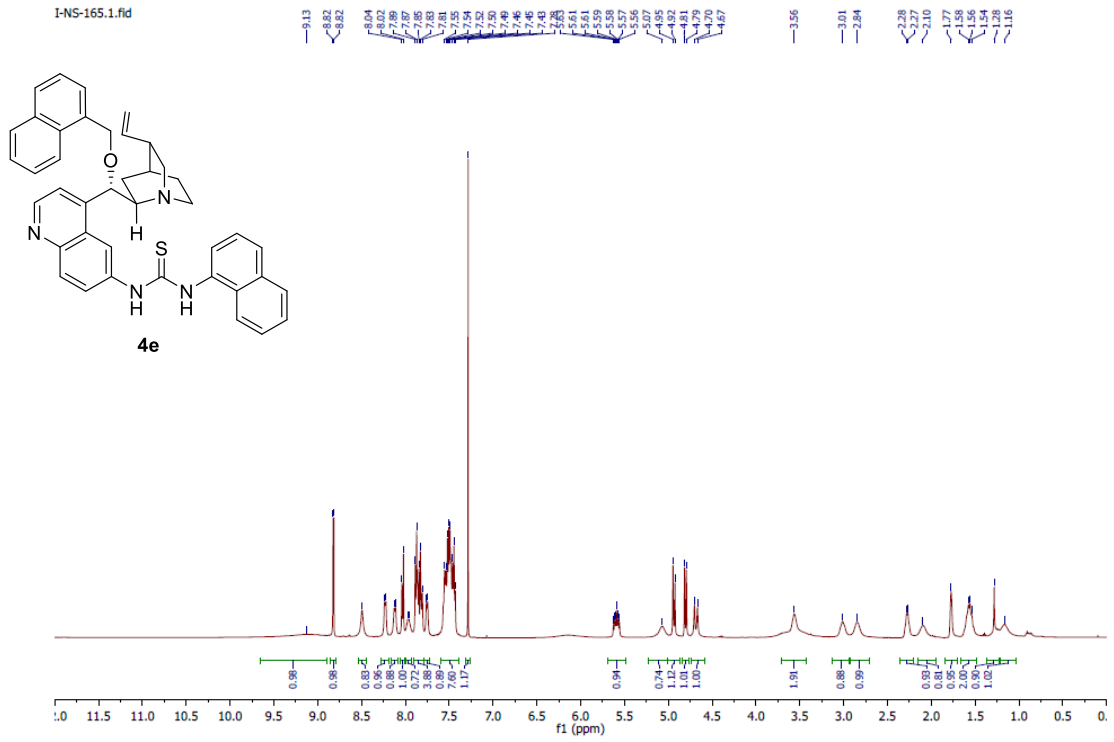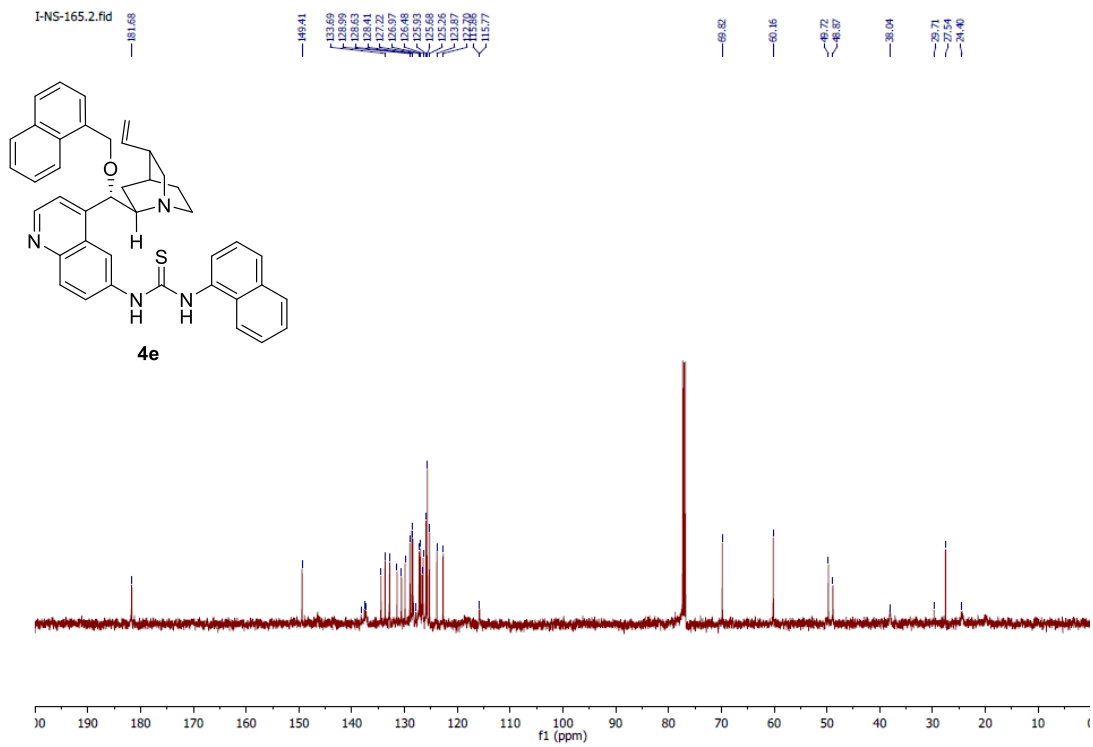

1-NS-91-PP1.1.fid

9.68  
8.74  
8.73  
8.69  
7.79  
7.75  
7.53  
7.51  
7.47  
7.46  
7.48  
7.39  
7.29  
7.18  
7.16  
6.53  
5.77  
5.76  
5.75  
5.73  
5.72  
5.64  
5.02  
4.92  
4.91  
4.63  
4.61  
4.10  
3.89  
3.88  
3.85  
3.35  
3.33  
3.09  
3.07  
3.05  
2.51  
2.49  
2.23  
2.22  
2.10  
2.10  
2.07  
1.89  
1.78  
1.76  
1.71  
1.70

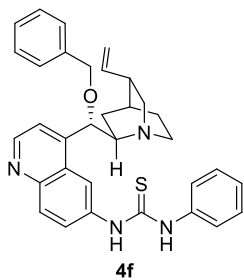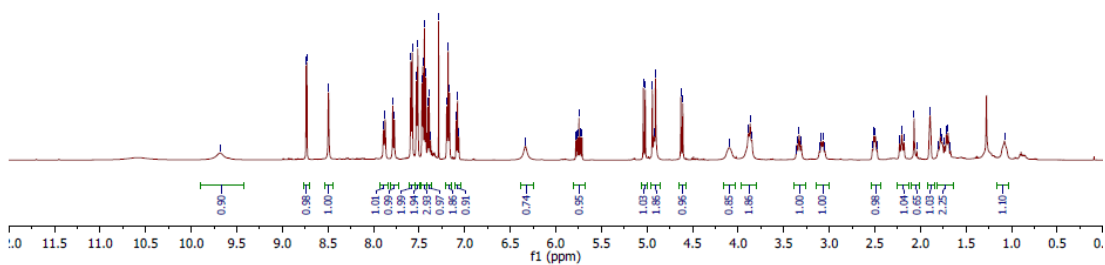

1-NS-91-P2.fid

179.81  
148.80  
141.53  
138.54  
137.68  
136.82  
136.33  
128.69  
128.53  
128.37  
128.35  
117.82  
117.03  
115.93  
72.12  
59.87  
49.69  
48.82  
27.25  
27.70  
23.48  
16.73

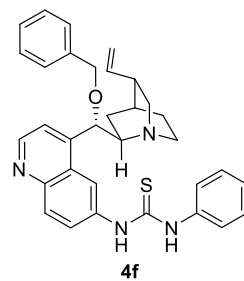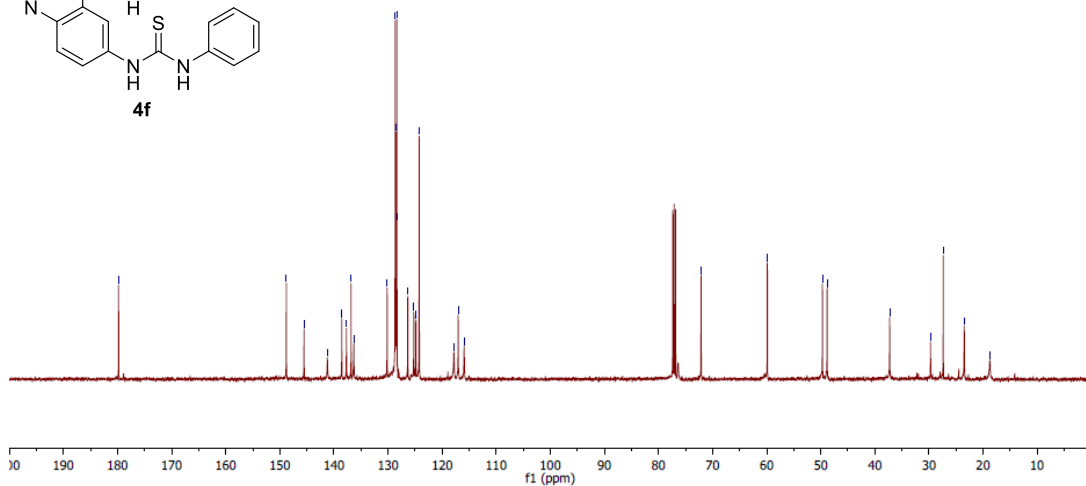

1-NS-180-1.1.fid

9.37  
8.74  
8.72  
8.64  
8.52  
7.98  
7.77  
7.77  
7.46  
7.46  
7.44  
7.44  
7.38  
7.38  
7.36  
7.35  
7.33  
7.24  
5.84  
5.79  
5.76  
5.73  
5.43  
4.83  
4.82  
4.82  
4.83  
3.44  
3.18  
3.15  
3.07  
2.75  
2.64  
2.60  
2.16  
2.14  
1.43  
1.40  
1.37  
1.35  
1.12

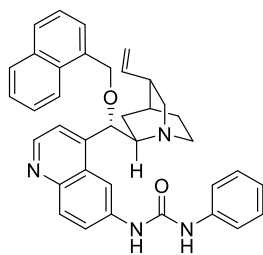

4h

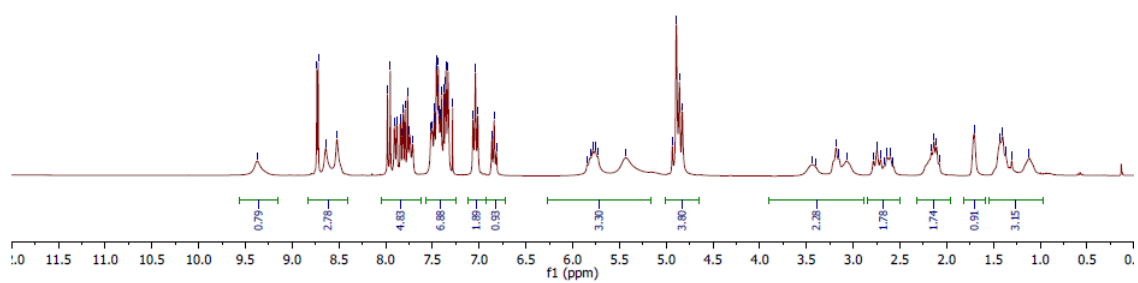

1-NS-180-1.2.fid

153.68  
147.88  
146.51  
144.26  
139.32  
138.66  
138.66  
133.14  
131.20  
130.80  
128.77  
128.77  
128.59  
126.90  
126.42  
126.29  
125.94  
125.94  
123.69  
123.38  
122.94  
119.46  
115.04  
66.52  
56.68  
46.66  
46.11  
36.11  
27.79  
25.37

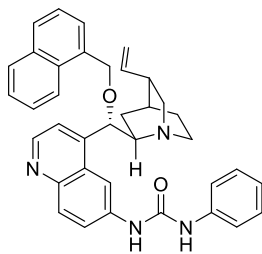

4h

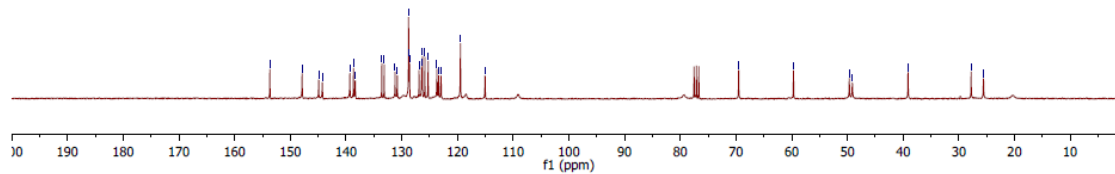

II-NS-365-1.1.fid

8.78  
8.77  
8.52  
8.26  
7.95  
7.94  
7.33  
7.32  
7.31  
7.29  
7.28  
7.18  
7.12  
7.11  
6.92  
5.97  
5.97  
5.95  
5.94  
5.93  
5.92  
5.02  
4.98  
4.97  
4.56  
4.40  
4.34  
3.38  
3.31  
2.90  
2.87  
2.74  
2.72  
2.70  
2.69  
2.21  
2.19  
1.93  
1.48  
1.46  
1.44  
1.39  
1.38  
1.37  
1.20

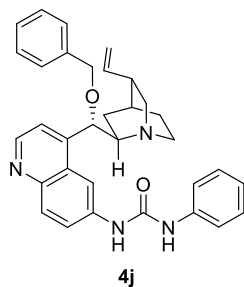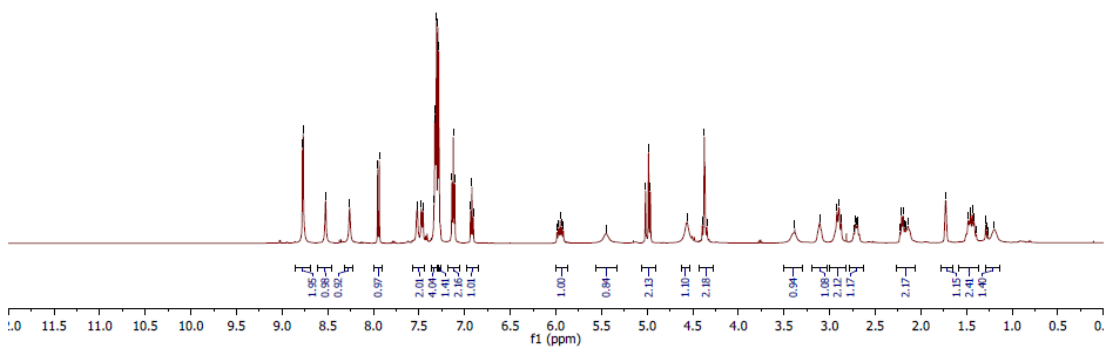

II-NS-365-1.2.fid

153.70  
148.29  
145.62  
144.99  
140.38  
137.66  
137.64  
130.63  
128.97  
128.36  
127.84  
127.74  
123.45  
118.08  
71.48  
59.98  
48.89  
48.35  
39.88  
28.11  
26.27

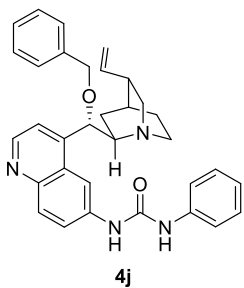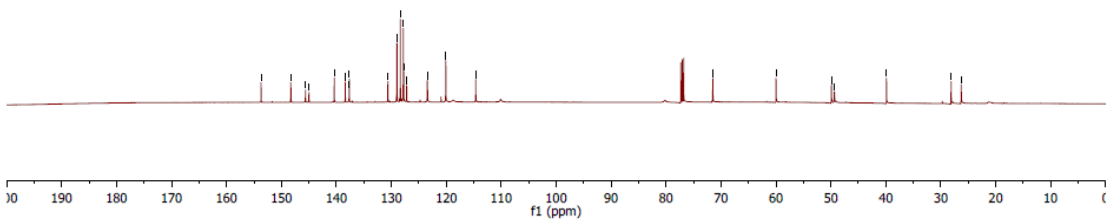



II-NS-213-P1.fid

8.61  
8.58  
8.02  
8.01  
7.88  
7.82  
7.51  
7.51  
7.50  
7.50  
7.47  
7.47  
7.28  
7.28  
5.66  
5.66  
5.63  
5.62  
5.61  
5.00  
4.95  
4.84  
4.83  
4.82

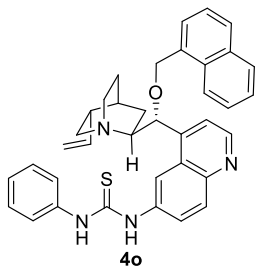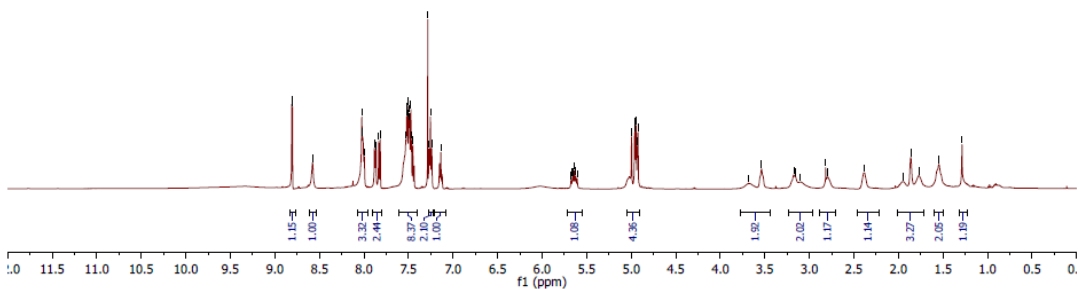

II-NS-213-P2.fid

179.98  
146.30  
146.25  
143.77  
139.35  
137.88  
137.46  
133.62  
133.24  
131.24  
128.72  
128.66  
128.72  
126.95  
126.42  
126.42  
126.12  
125.97  
125.92  
125.38  
123.45  
116.06

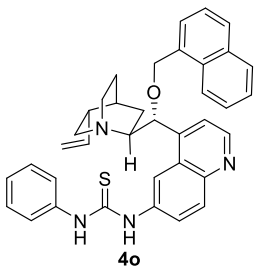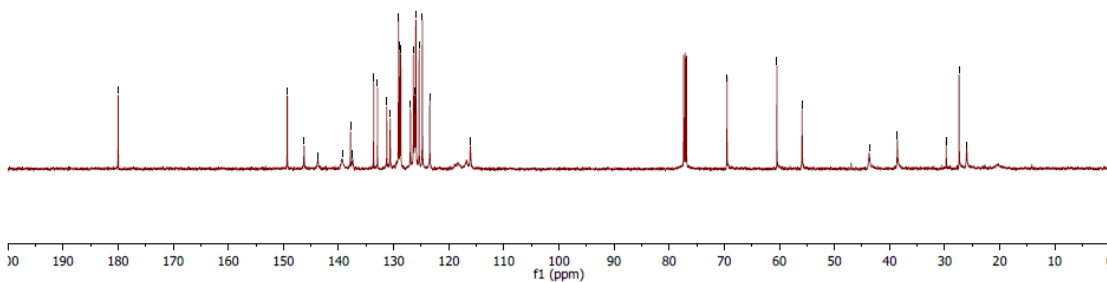



1-NS-96-P1.fid

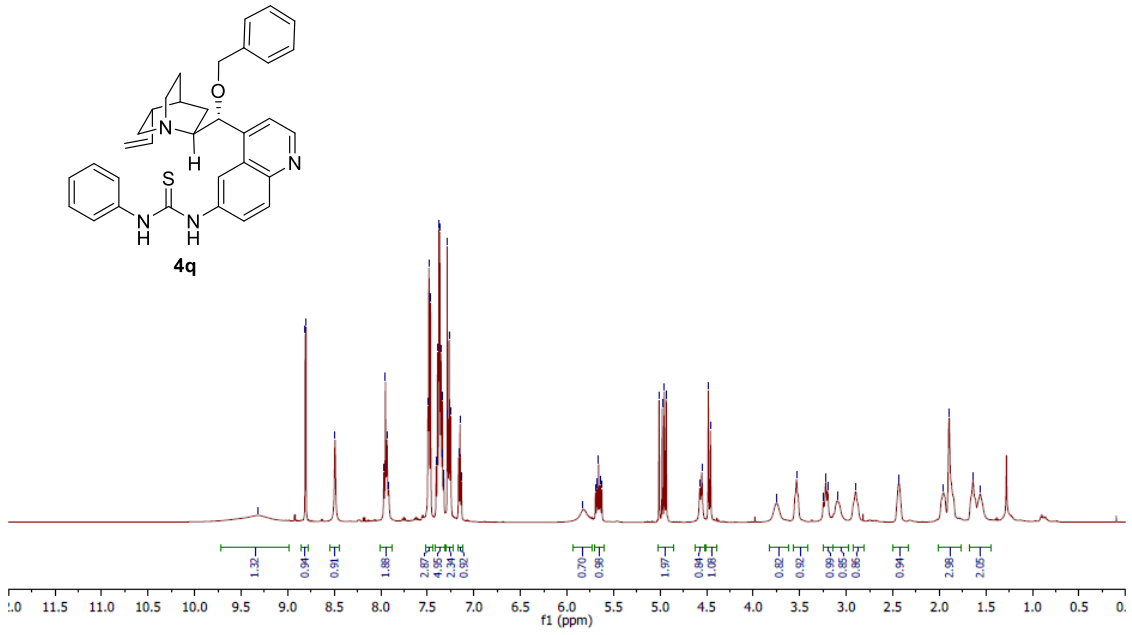

1-NS-96-P2.fid

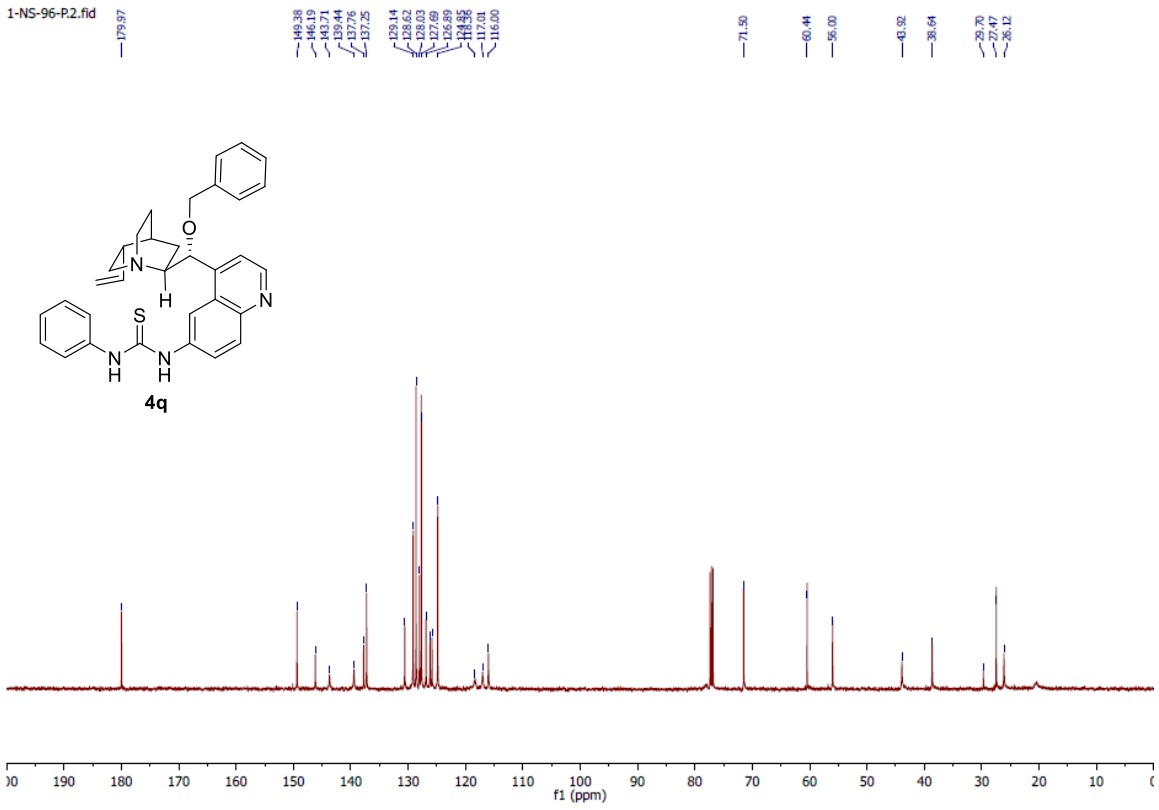

II-NS-361-2.1.fid

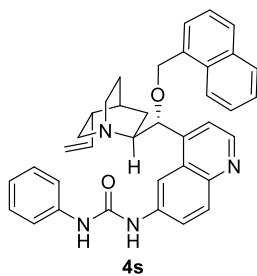

8.94  
8.75  
8.75  
8.66  
8.60  
7.99  
7.97  
7.94  
7.94  
7.78  
7.77  
7.46  
7.44  
7.41  
7.40  
7.37  
7.36  
7.12  
5.68  
5.67  
5.64  
5.64  
5.64  
5.62  
4.91  
4.87  
4.85  
4.84  
4.83

3.40  
3.38  
3.21  
3.04  
3.02  
2.99  
2.98  
2.63  
2.58  
2.20  
1.86  
1.76  
1.70  
1.61  
1.41

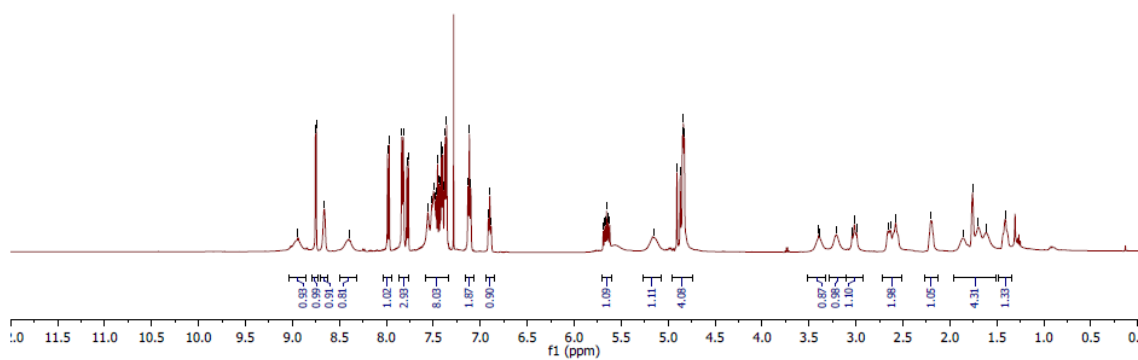

II-NS-361-1.2.fid

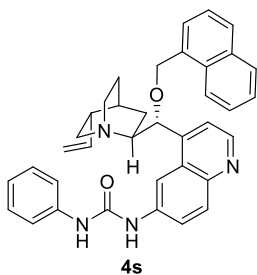

153.77  
148.24  
141.49  
138.43  
137.52  
133.36  
131.17  
130.71  
128.99  
128.59  
128.51  
126.11  
125.80  
125.31  
123.48  
122.98  
69.34  
60.60  
56.70  
40.08  
39.70  
29.74  
27.63

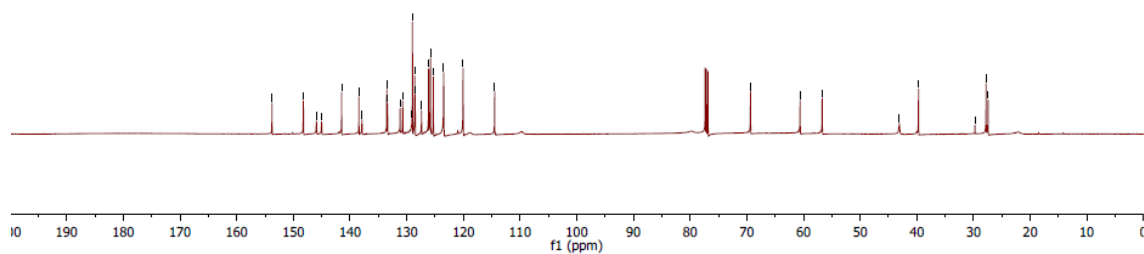

1-NS-179-1.1.fid

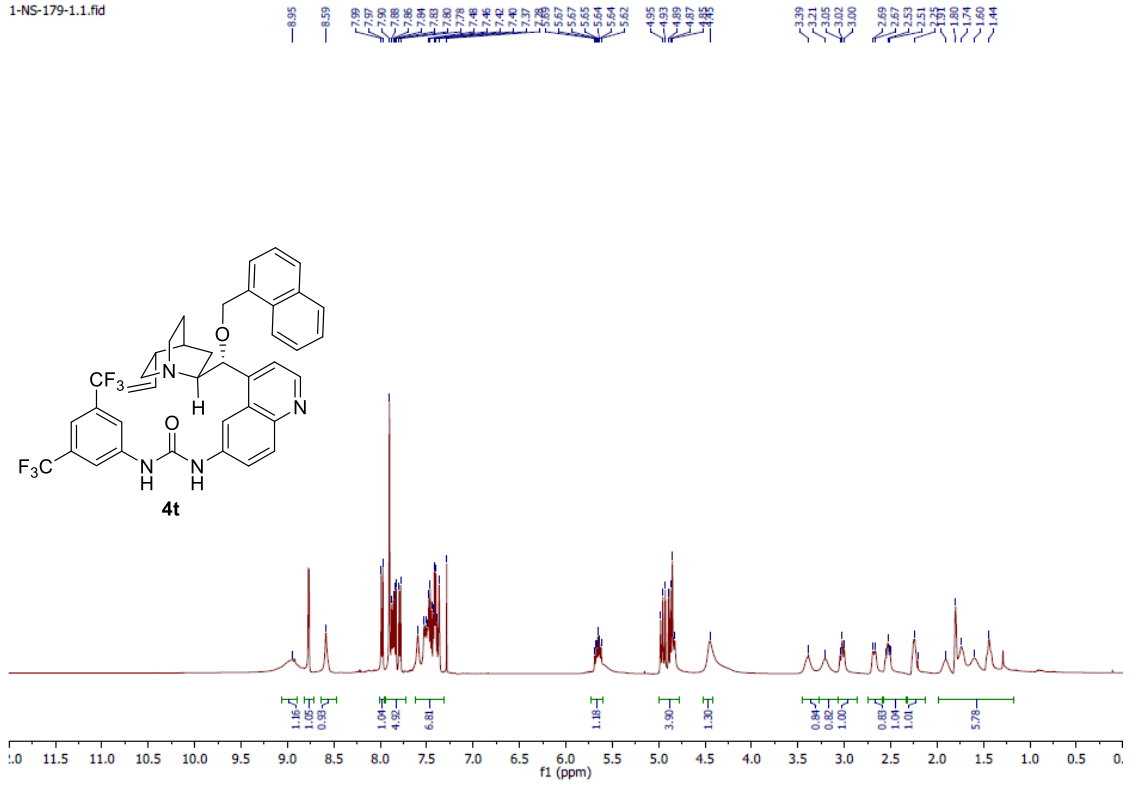

1-NS-179-1.2.fid

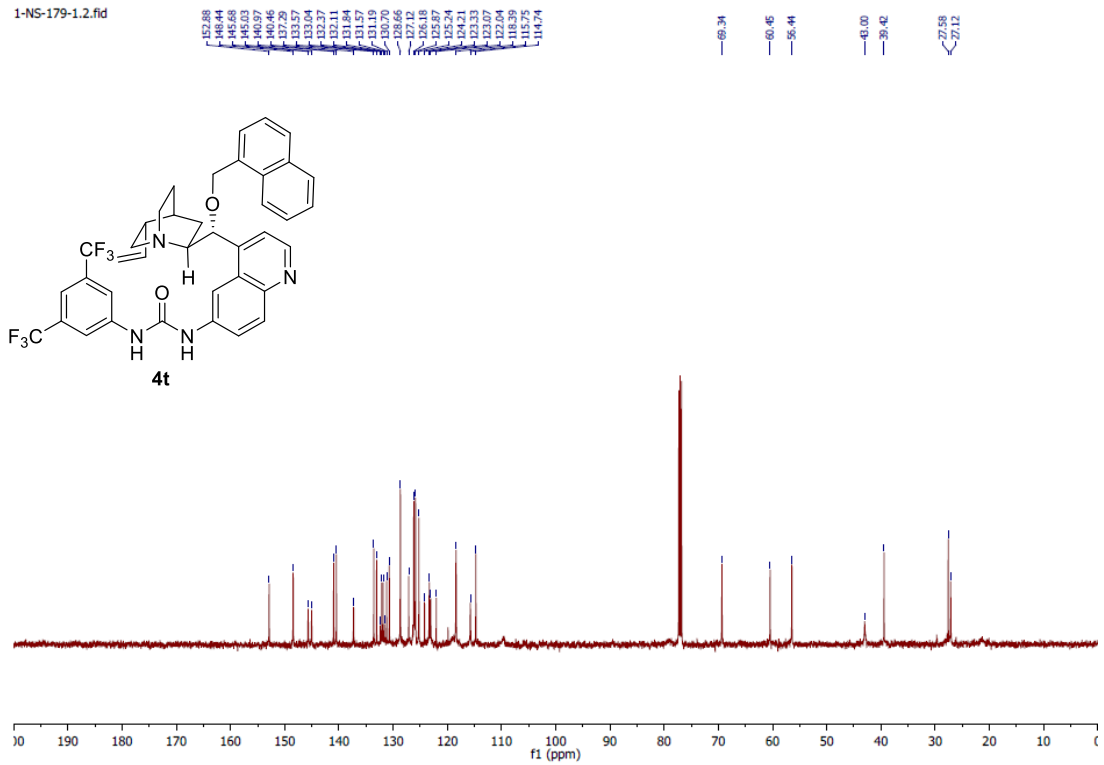

II-NS-358-1.1.fid

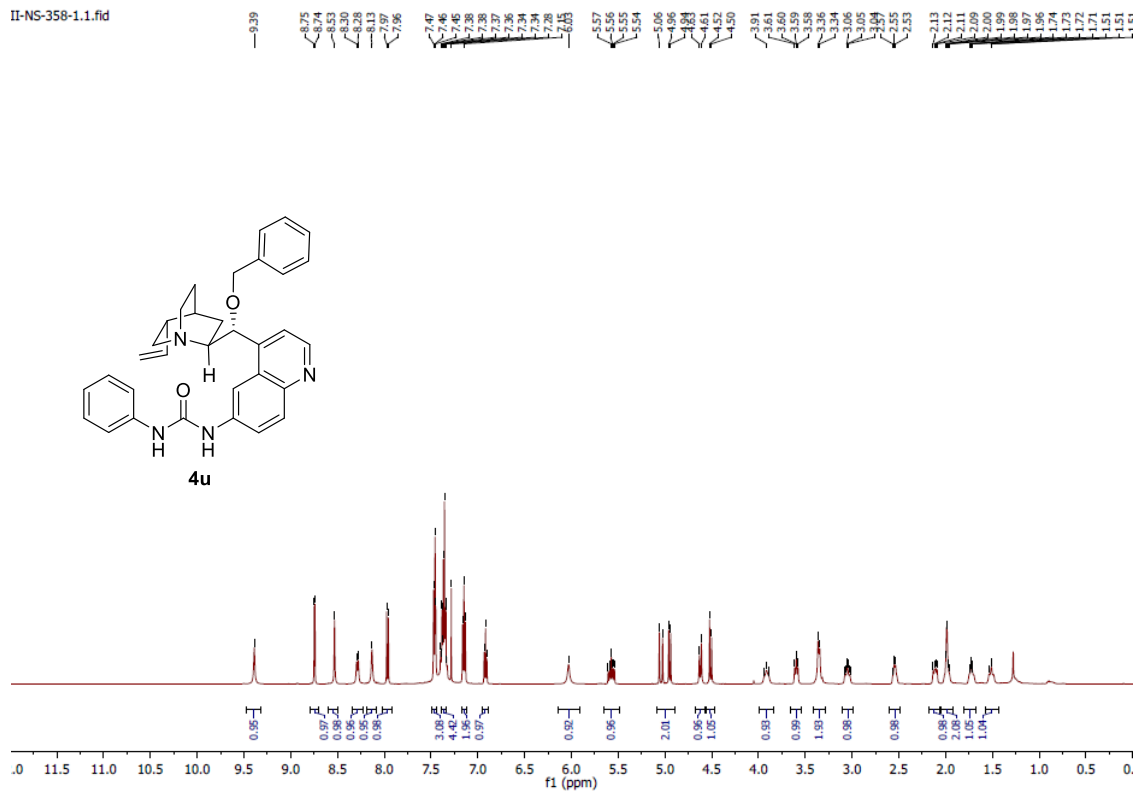

II-NS-358-1.2.fid

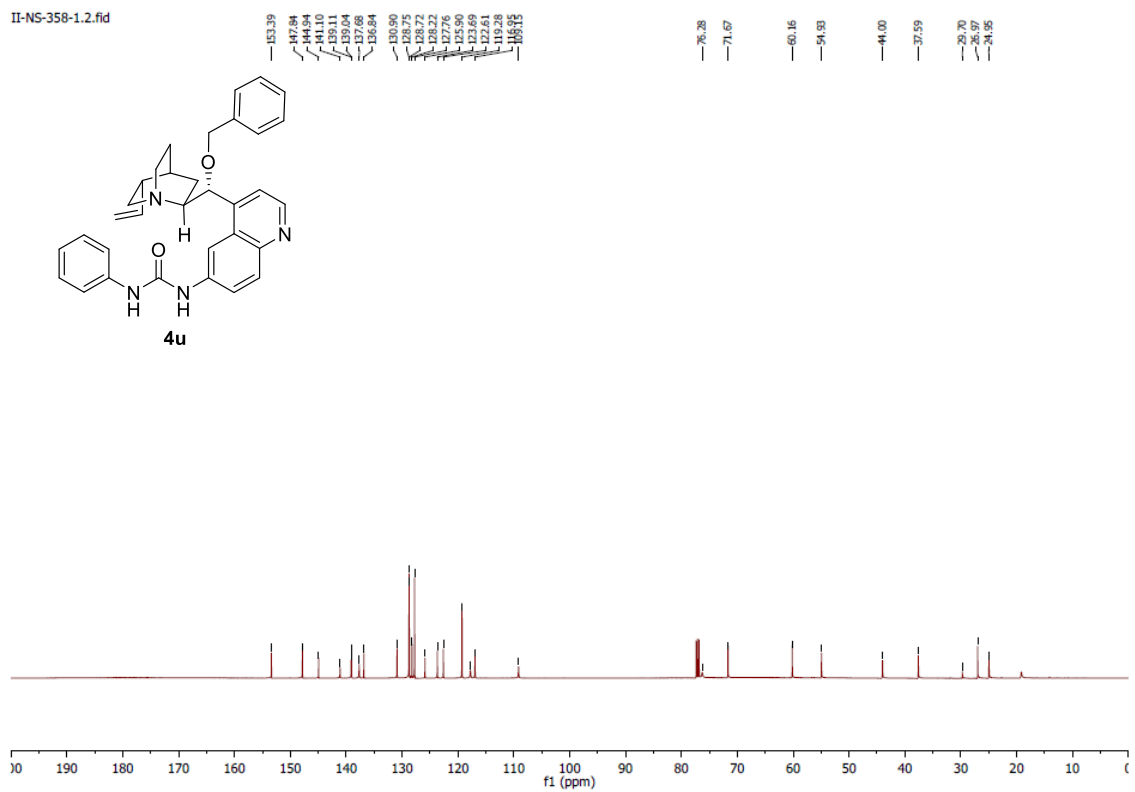

9.41  
9.38  
9.34  
9.31  
7.58  
7.55  
7.53  
7.60  
7.59  
7.57  
7.57  
7.49  
7.48  
7.46  
7.34  
7.33  
7.33  
7.31  
7.28  
7.24  
7.24  
7.23  
3.23  
3.21  
3.19  
3.12  
3.12  
3.09  
3.08  
2.88  
2.87  
2.85  
2.83  
2.76  
2.75  
2.75  
2.73  
2.73  
2.72  
2.71  
2.70  
2.70  
2.60  
2.59  
2.58  
2.58  
2.57  
2.19  
2.18  
2.16  
2.15  
2.06  
2.05  
2.03  
2.02  
1.64  
1.62  
1.61  
1.60  
1.59  
1.57  
1.56  
1.39  
1.38  
1.38  
1.36  
1.35

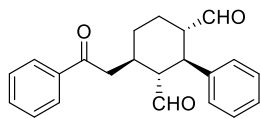

3a

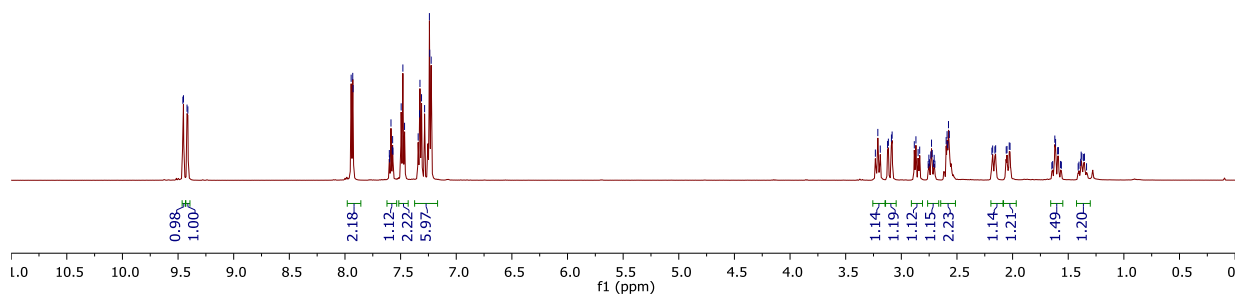

1-rp-891-022.d

203.40  
202.62  
198.42

139.29  
136.82  
133.32  
129.24  
128.67  
128.05  
127.97  
127.79

77.29  
77.03  
76.78

60.56

54.65

45.49

42.67

32.91

30.49

25.93

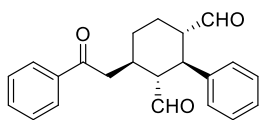

3a

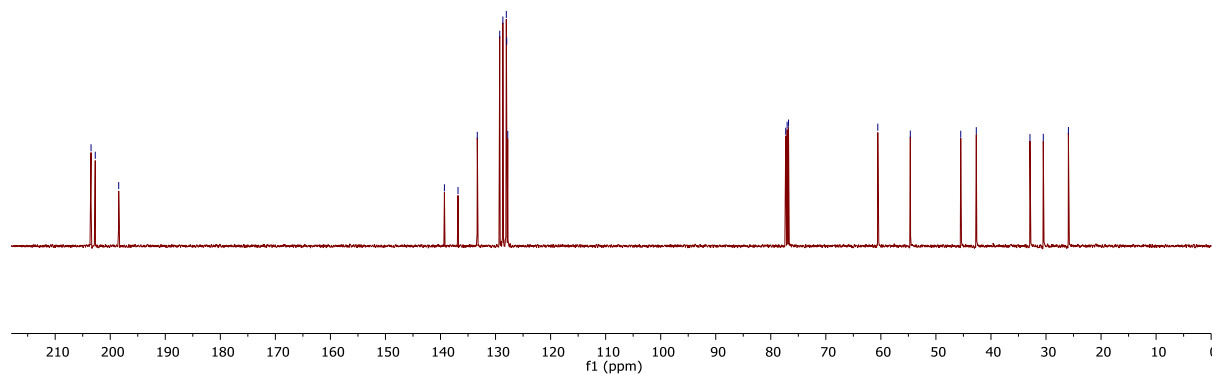

1-rp-2095-pure.1.fid

9.46  
9.46  
9.42  
9.41

7.94  
7.93  
7.93  
7.60  
7.59  
7.58  
7.57  
7.50  
7.48  
7.47  
7.15  
7.14  
6.86  
6.85

3.79  
3.17  
3.15  
3.11  
3.08  
3.07  
2.88  
2.86  
2.84  
2.83  
2.69  
2.68  
2.67  
2.66  
2.65  
2.55  
2.54  
2.53

2.17  
2.17  
2.15  
2.14  
2.04  
2.03  
2.01  
2.00  
1.82  
1.61  
1.59  
1.58  
1.36  
1.33

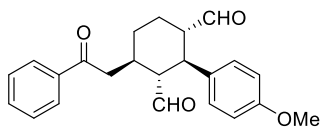

3b

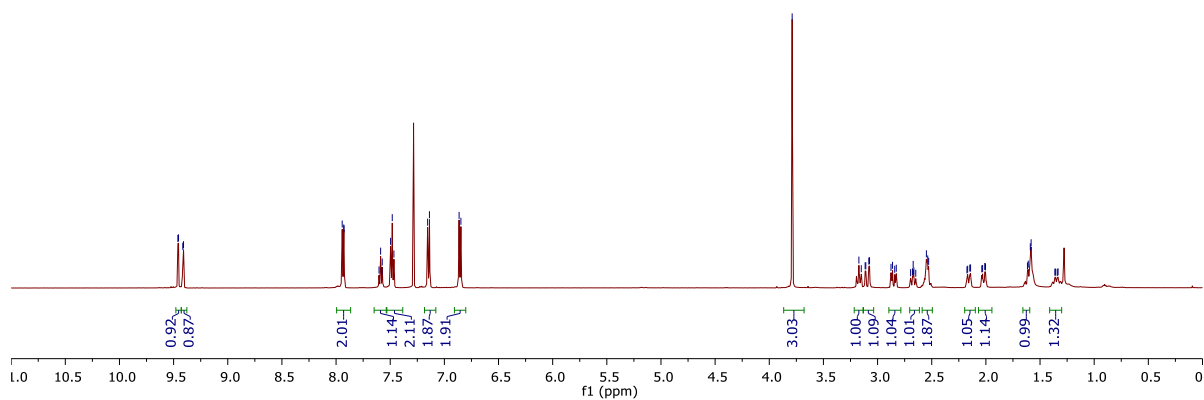

1-rp-2095-pure.1.fid

203.66  
202.66  
198.59

158.93

136.82  
133.31  
131.15  
128.94  
128.67  
128.05

114.61

77.27  
77.02  
76.76

60.78  
55.22  
54.86

44.67  
42.69

32.94  
30.49  
25.97

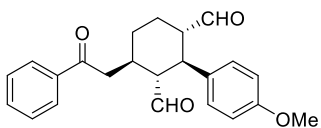

3b

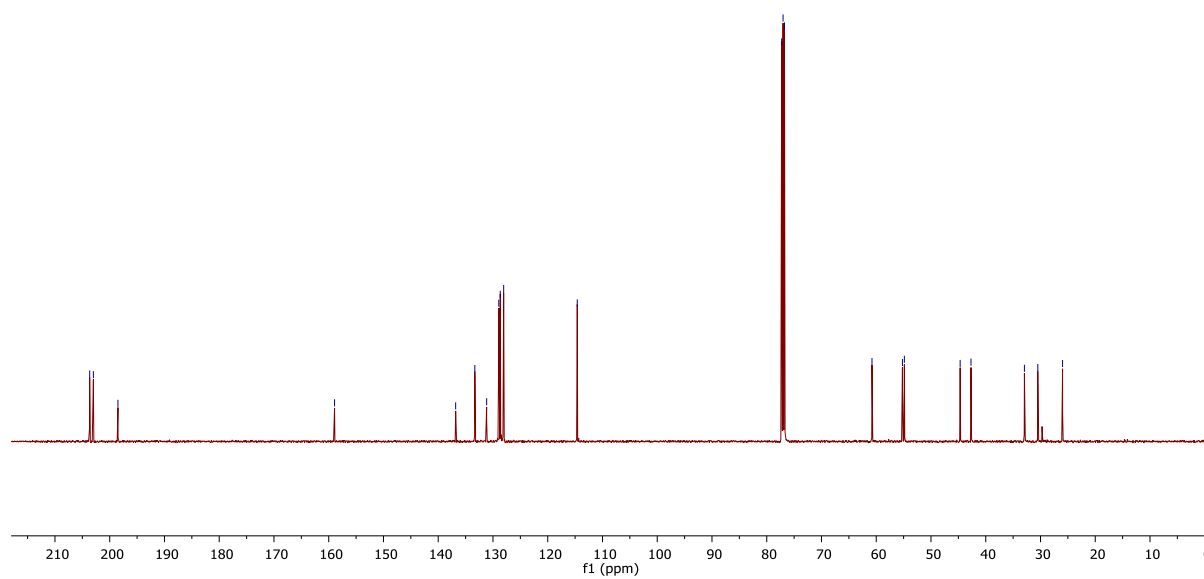

1-rp-2094-pure.1.fid

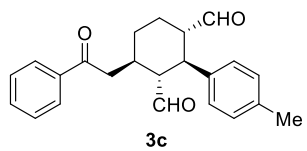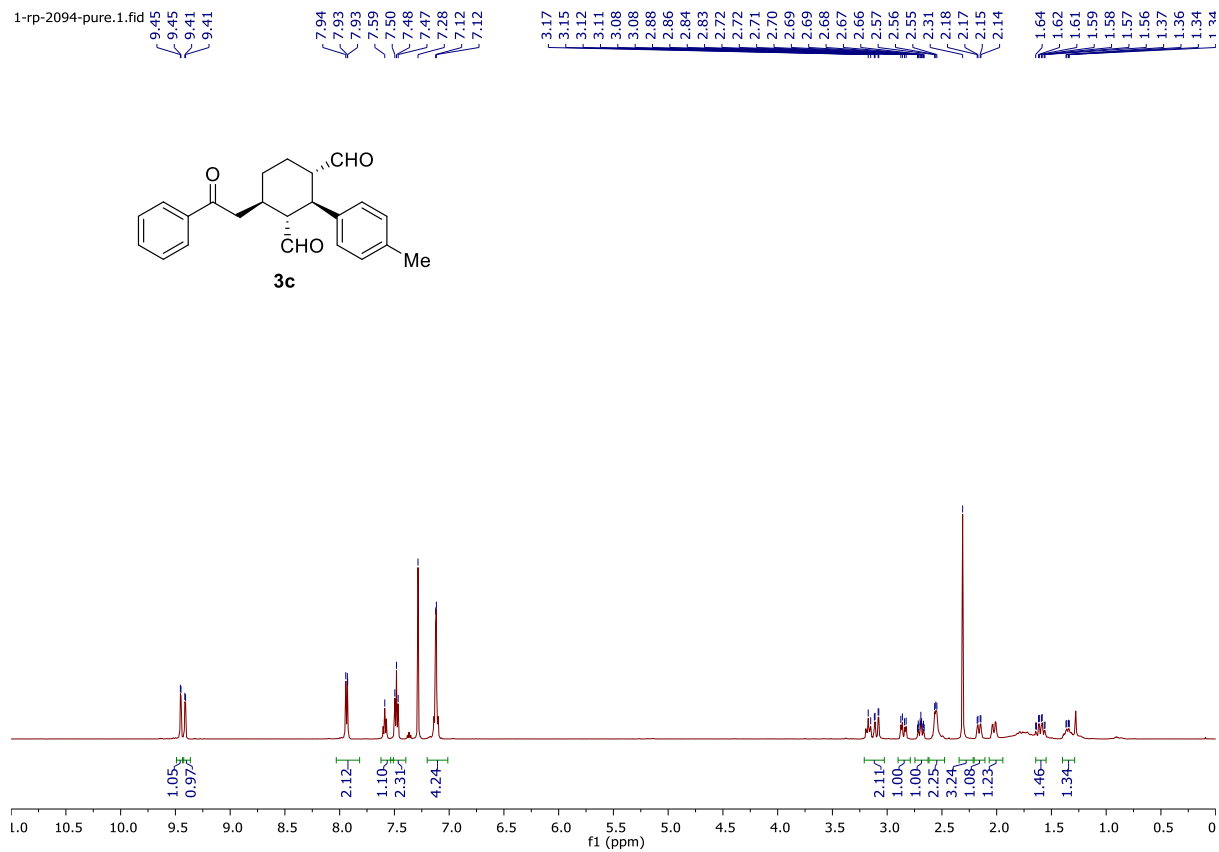

1-rp-2094-pure-repeat-1.3.fid

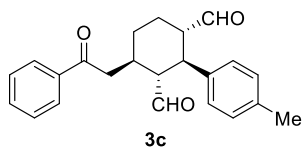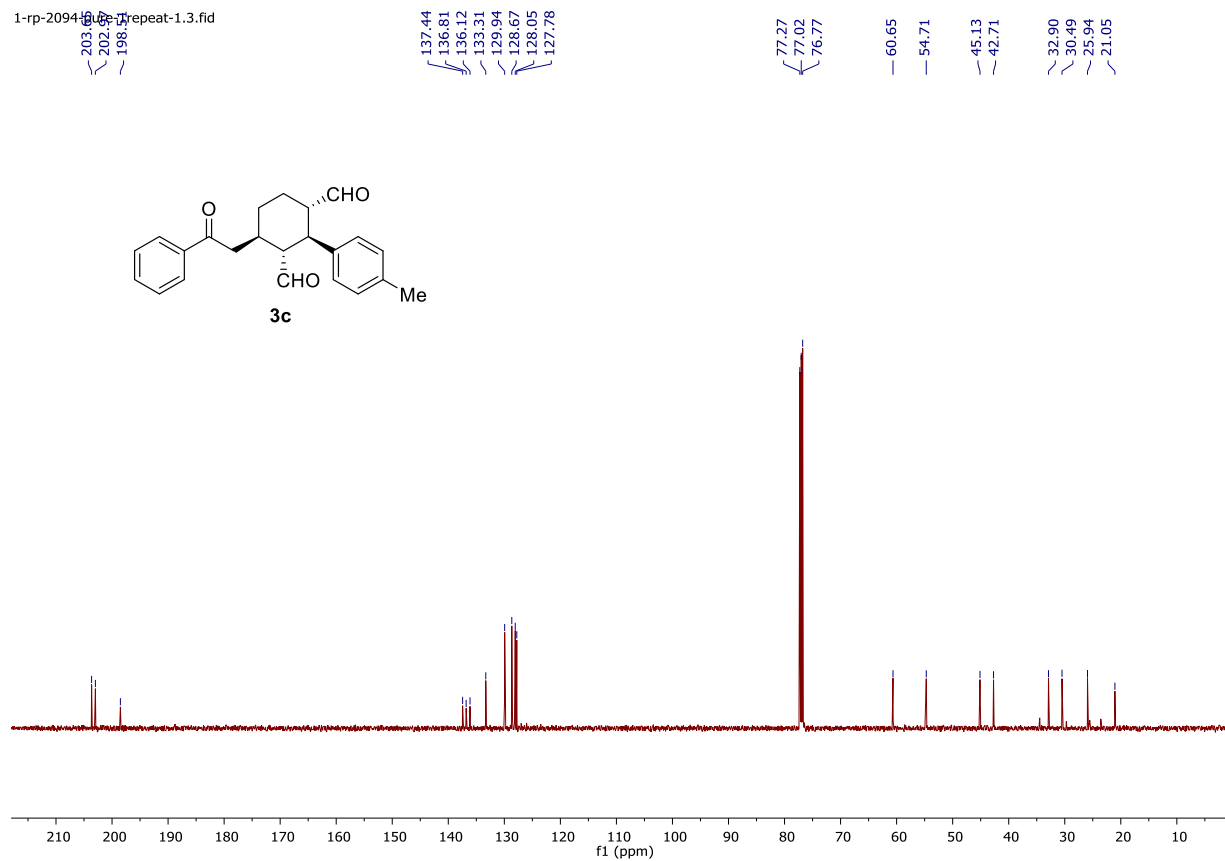

1-rp-2118-pure.1.fid

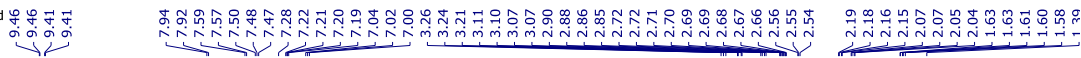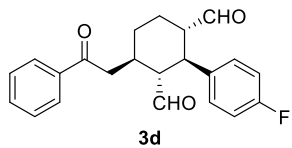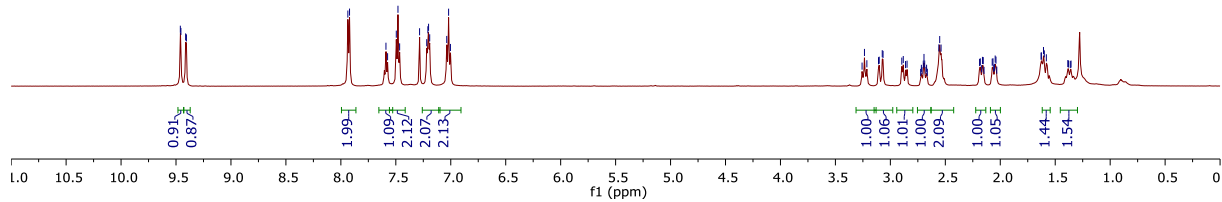

1-rp-2118-pure.1.fid

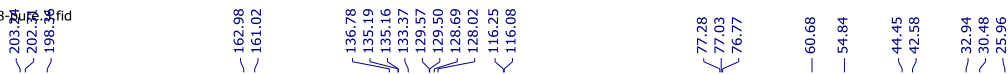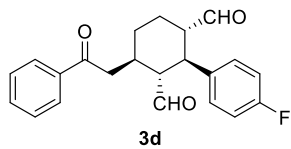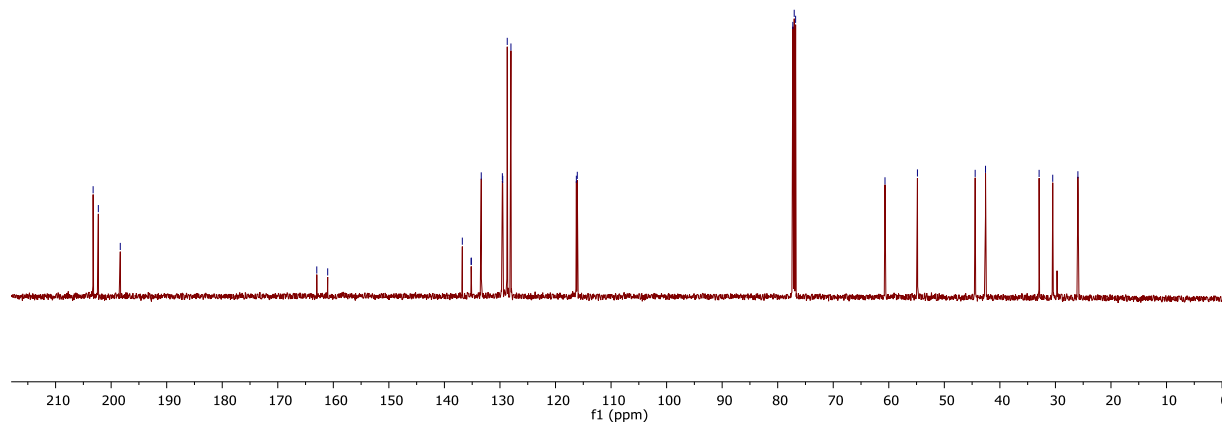



1-rp-2103-pure-1.1.fid

9.46  
9.41  
9.41

7.94  
7.92  
7.92  
7.50  
7.48  
7.31  
7.30  
7.28  
7.18  
7.17  
3.25  
3.23  
3.21  
3.11  
3.10  
3.08  
3.07  
2.90  
2.89  
2.87  
2.85  
2.73  
2.71  
2.70  
2.70  
2.68  
2.57  
2.56  
2.56  
2.55  
2.54  
2.53  
2.19  
2.19  
2.17  
2.16  
2.09  
2.08  
2.06  
2.05  
1.62  
1.60  
1.59  
1.57  
1.55  
1.39  
1.38

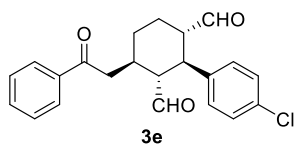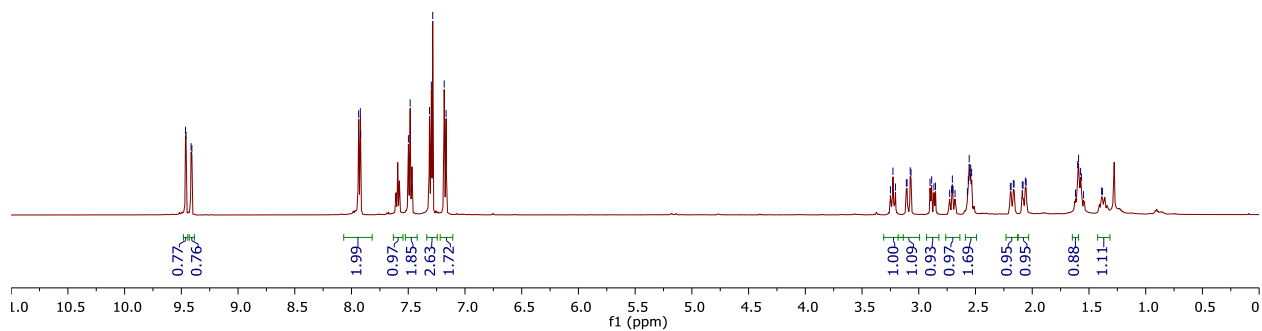

1-rp-2103-pure-2.fid

203.50  
202.68  
198.30

137.97  
136.75  
133.52  
133.39  
132.40  
129.33  
128.70  
128.03

77.27  
77.02  
76.77

60.48

54.68

44.53

42.55

32.91

30.49

25.92

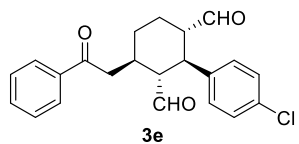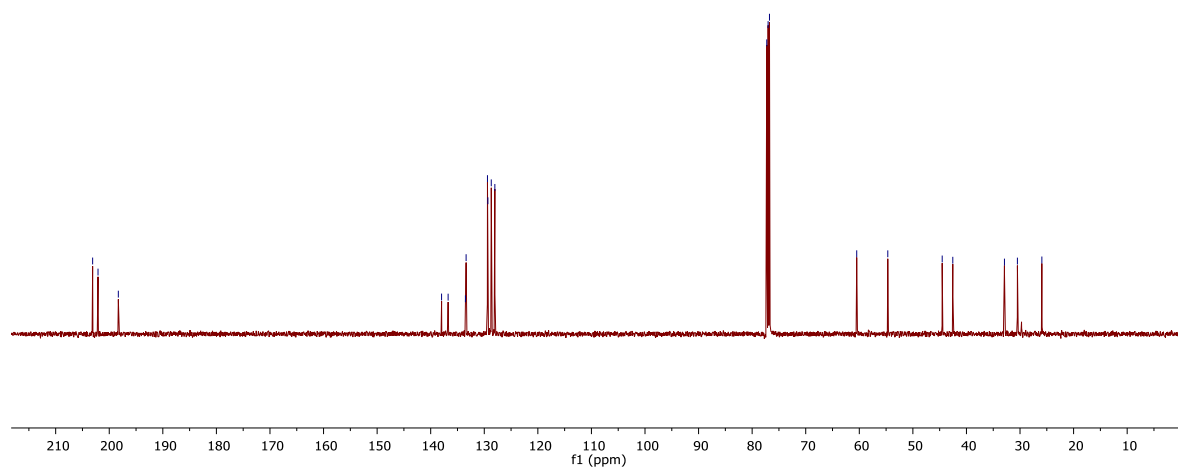

1-rp-2104-pure-b2-last.3.fid

9.444, 9.441, 9.411, 9.411, 7.94, 7.92, 7.92, 7.59, 7.50, 7.48, 7.47, 7.45, 7.28, 7.13, 7.11, 3.24, 3.23, 3.22, 3.20, 3.08, 3.07, 2.89, 2.70, 2.56, 2.55, 2.55, 2.54, 2.53, 2.19, 2.19, 2.17, 2.16, 2.06, 1.60, 1.59, 1.58, 1.57, 1.56, 1.56, 1.59, 1.58, 1.37, 1.36

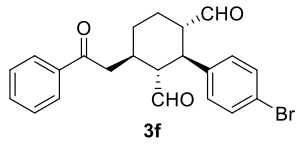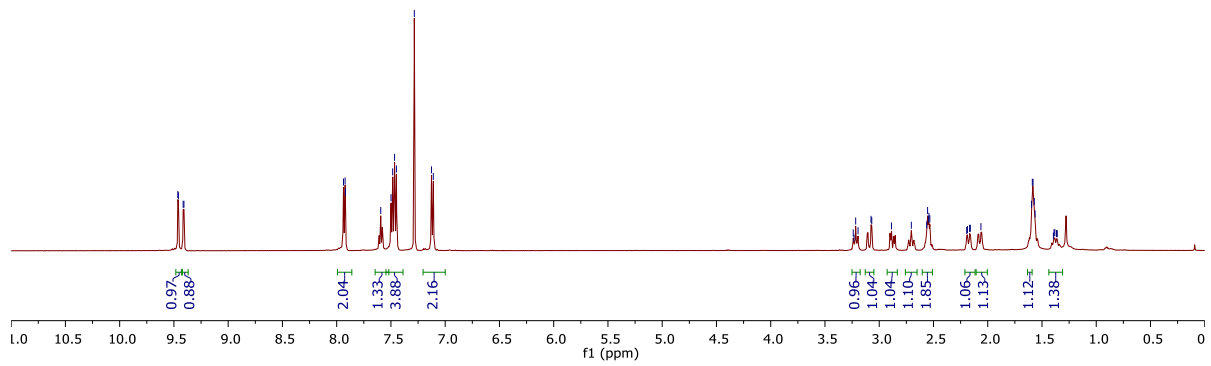

1-rp-2104-pure-b2-last.3.fid

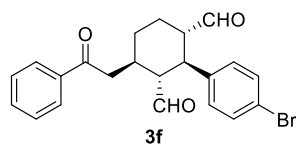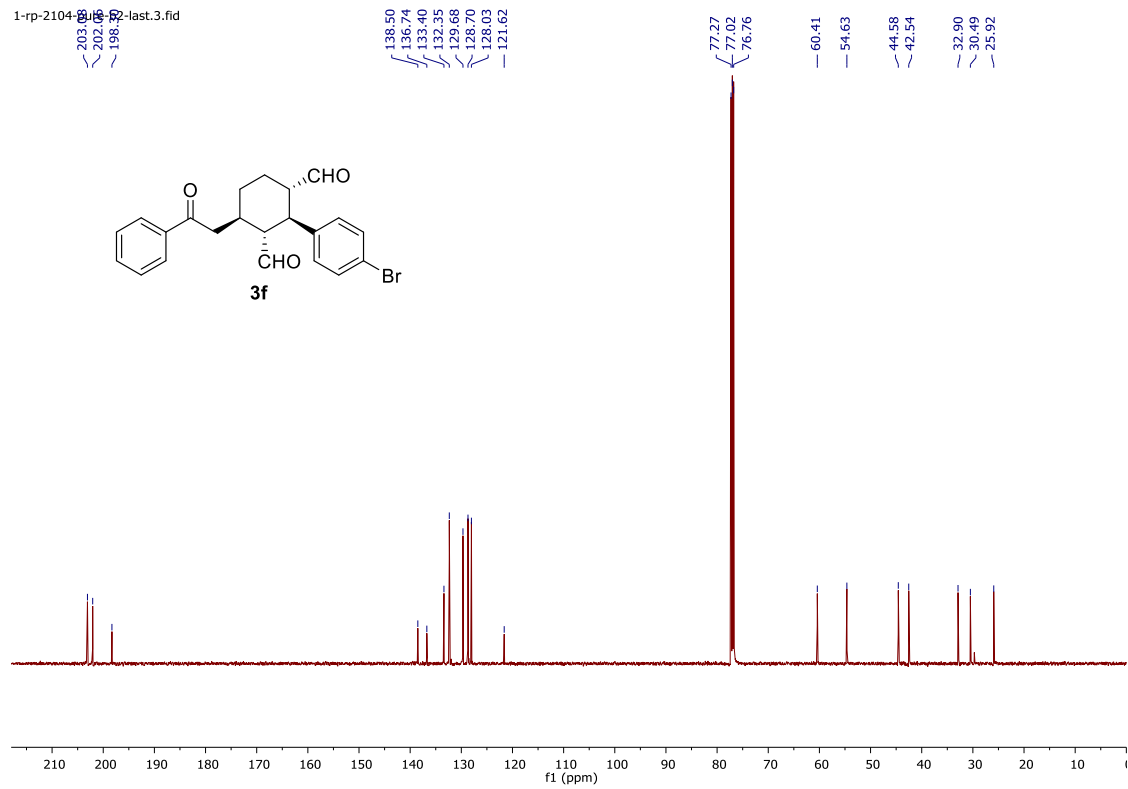

1-rp-2097-pure-repeat

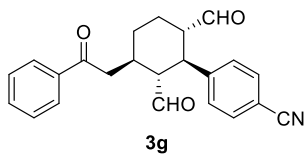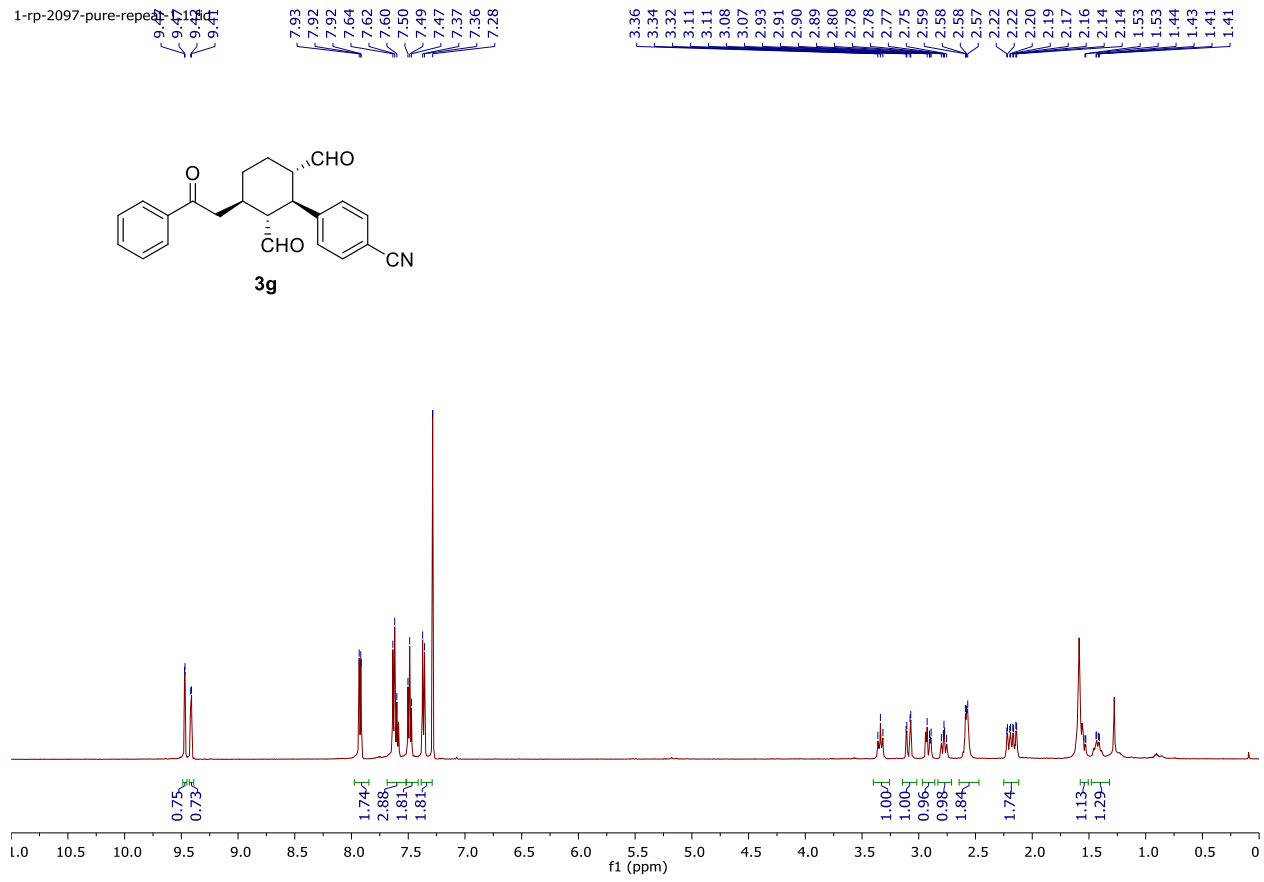

1-rp-2097-pure-repeat-1.2.fid

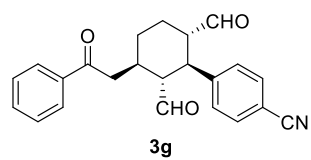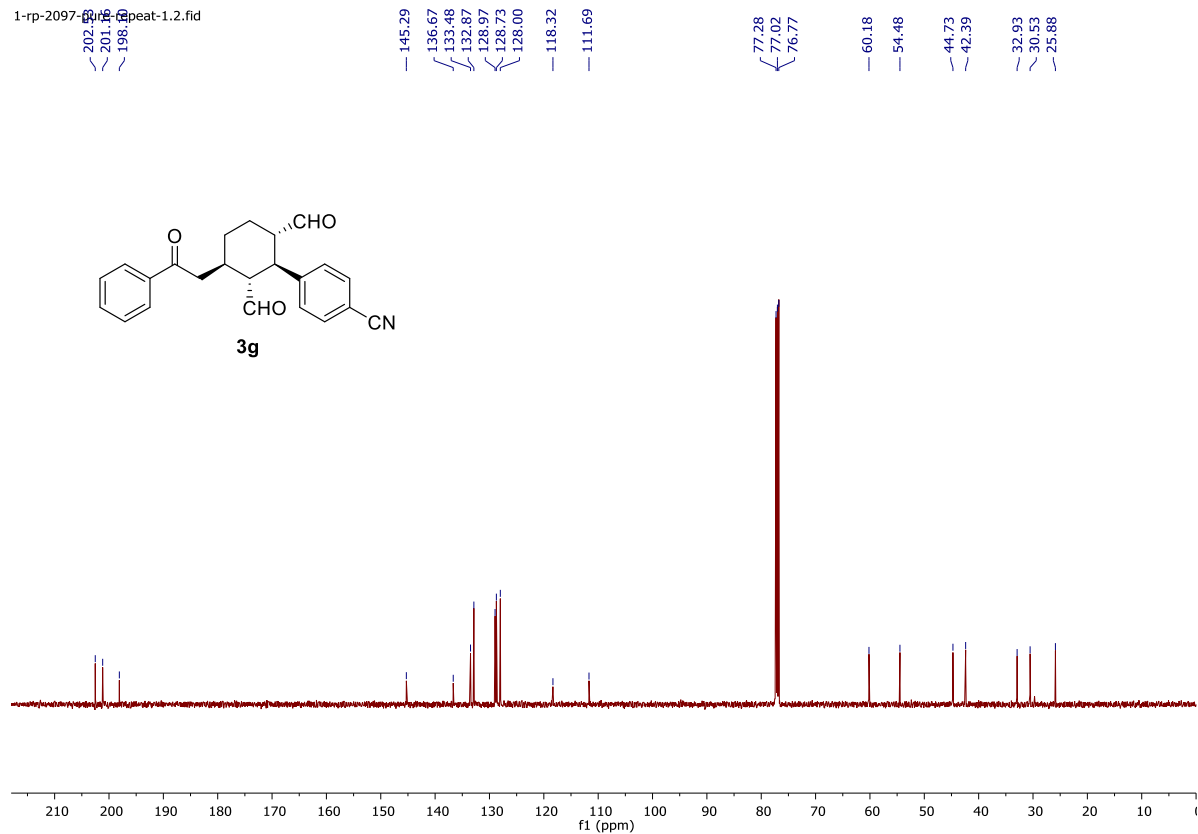

1-rp-2134-pure-1.1.fid

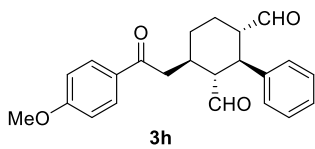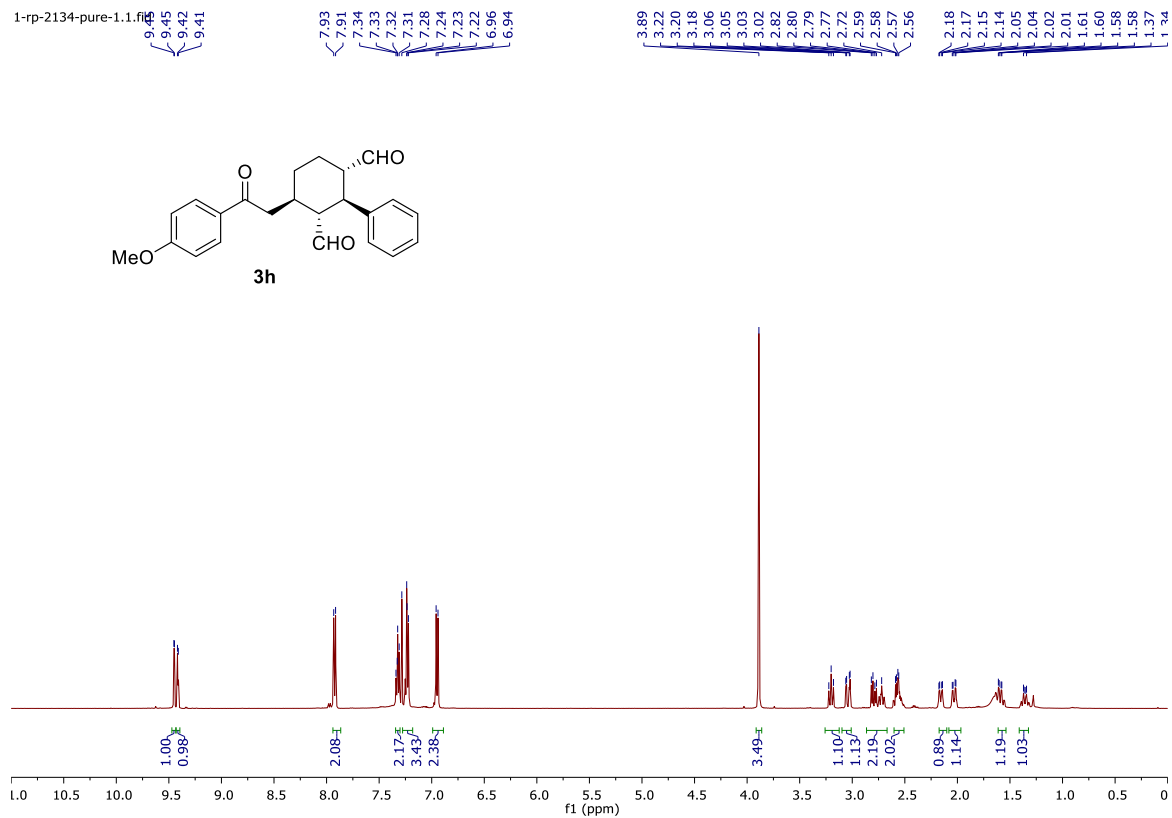

1-rp-2134-27-196.2.fid

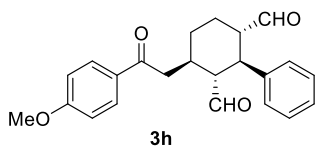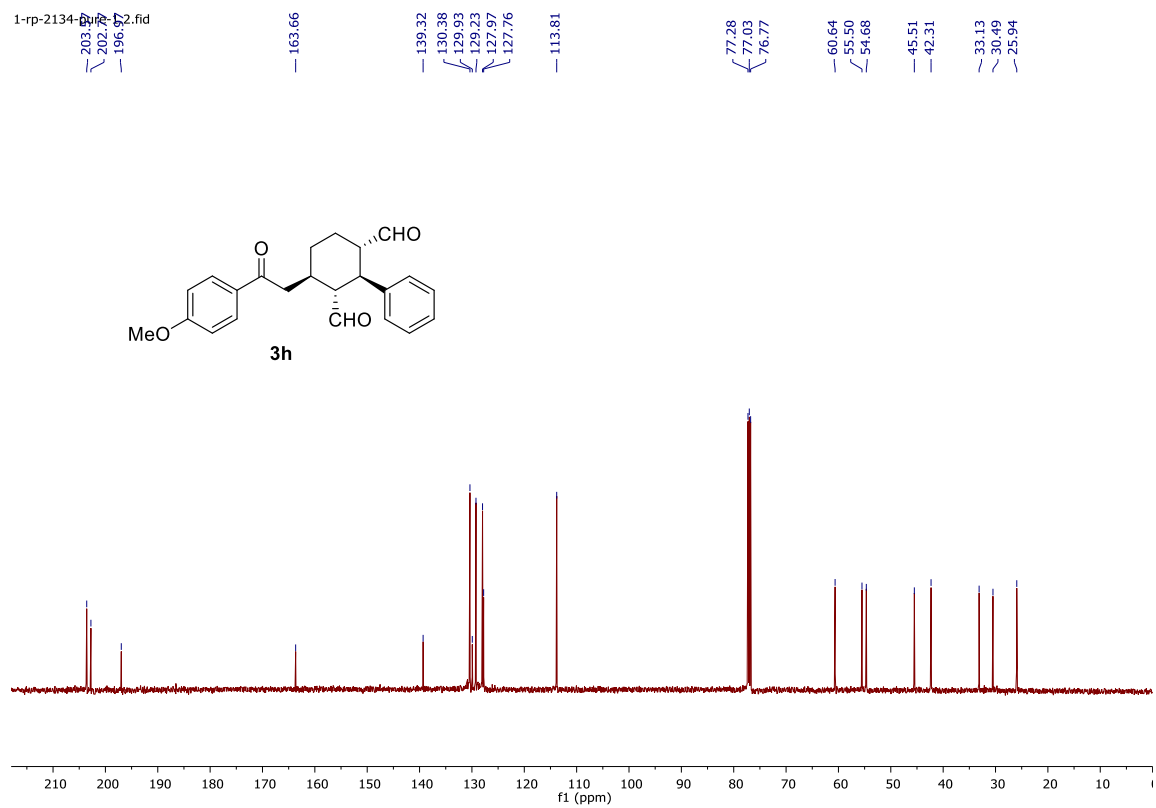

1-rp-2107-pure.1.fid

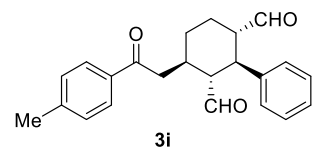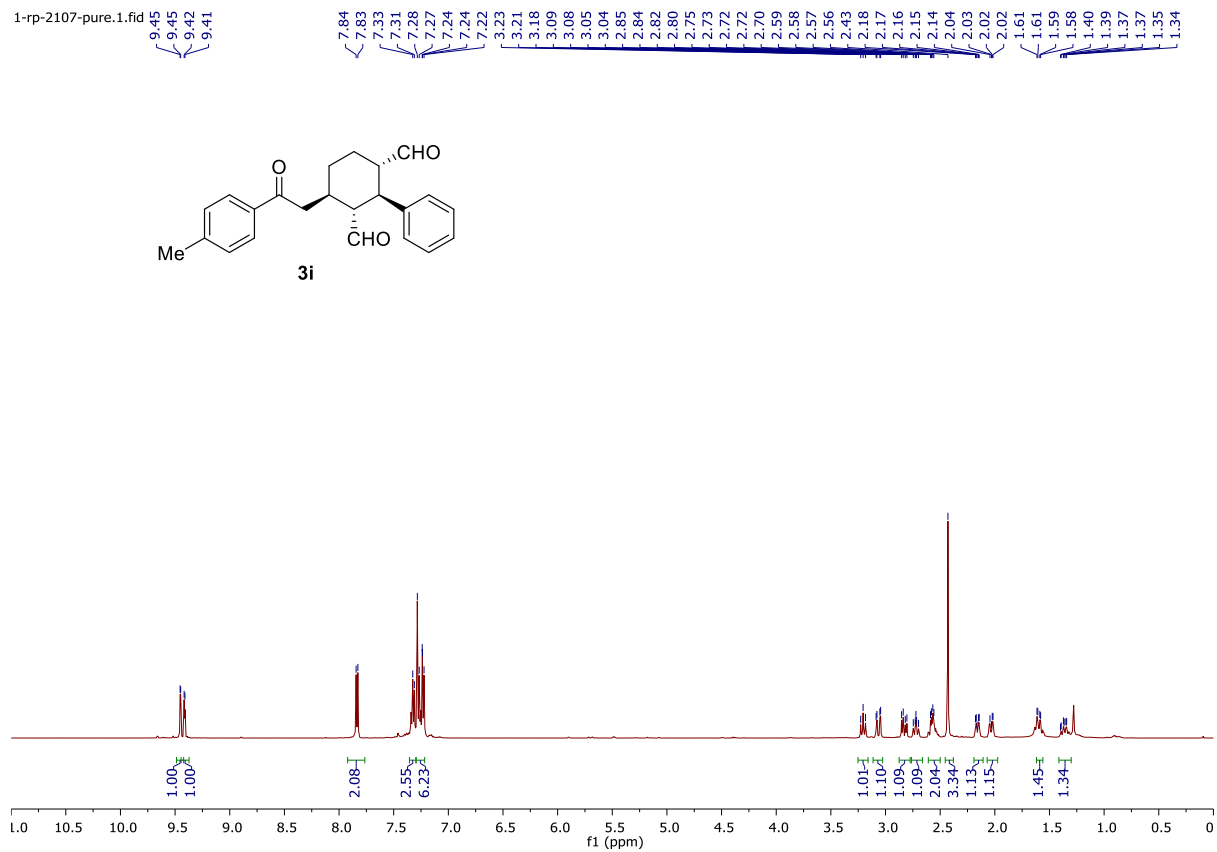

1-rp-2107-pure.2.fid

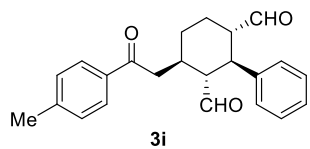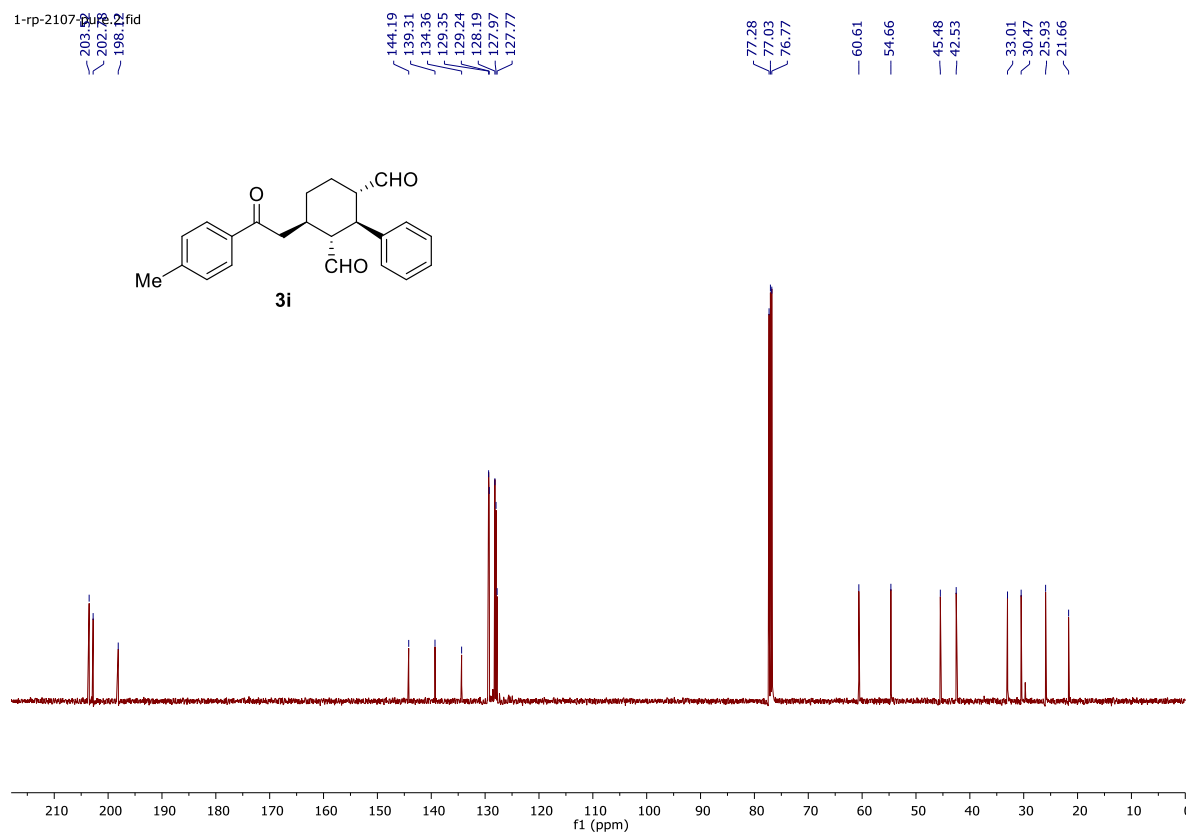

1-rp-2109-pure.1.fid

9.46  
9.45  
9.40  
9.40

7.98  
7.97  
7.96  
7.34  
7.33  
7.31  
7.28  
7.26  
7.24  
7.24  
7.23  
7.16  
7.15  
7.13

3.23  
3.20  
3.18  
3.10  
3.10  
3.07  
3.06  
2.83  
2.82  
2.80  
2.79  
2.75  
2.74  
2.73  
2.72  
2.59  
2.58  
2.56  
2.55

2.17  
2.16  
2.15  
2.14  
2.06  
2.05  
2.03  
1.64  
1.62  
1.61  
1.59  
1.38

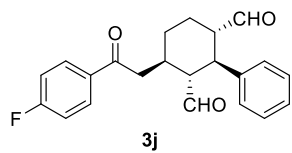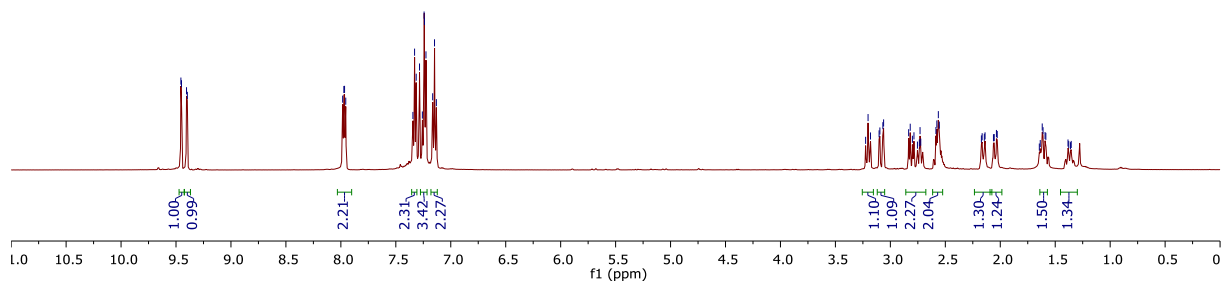

1-rp-2109-pure.1.fid

203.87  
202.68  
196.82

166.88  
164.85

139.21  
133.23  
133.20  
130.77  
130.69  
129.27  
127.95  
127.83

115.88  
115.70

77.29  
77.04  
76.78

60.53  
54.65

45.52  
42.64

32.89  
30.51  
25.91

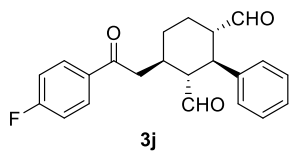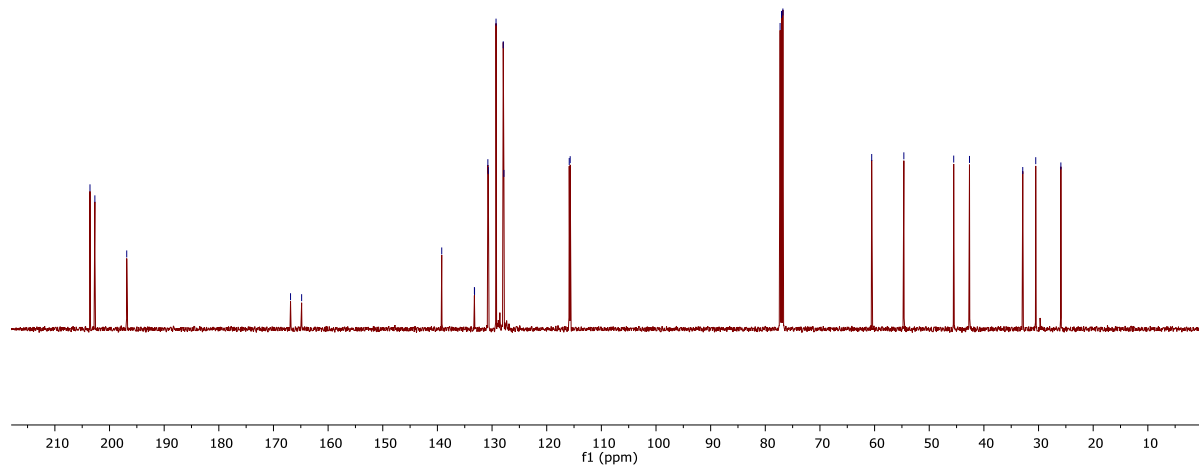

1-rp-2110-pure.1.fid

9.46  
9.45  
9.40  
9.39

7.89  
7.87  
7.46  
7.45  
7.35  
7.33  
7.32  
7.26  
7.25  
7.24  
7.24  
7.22

3.22  
3.20  
3.18  
3.10  
3.09  
3.07  
3.06  
2.83  
2.82  
2.80  
2.78  
2.75  
2.74  
2.73  
2.72  
2.71  
2.58  
2.58  
2.56  
2.56  
2.55

2.17  
2.16  
2.14  
2.13  
2.06  
2.06  
2.04  
1.62  
1.61  
1.59  
1.58  
1.38  
1.35

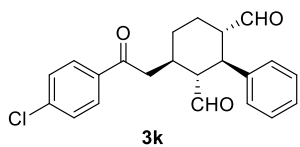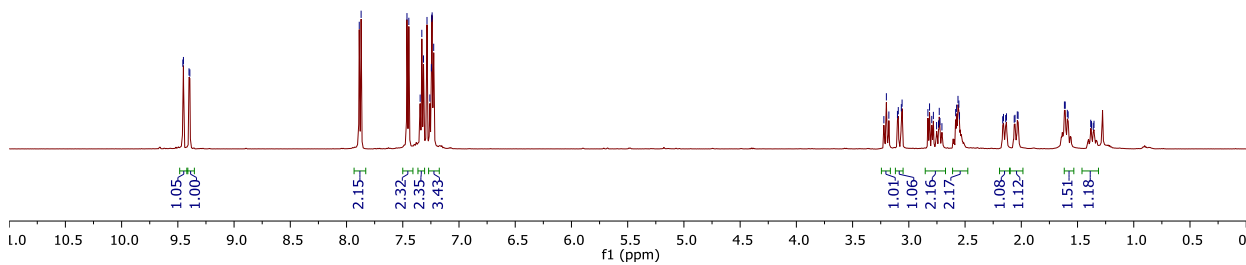

1-rp-2110-pure.1.fid

203.56  
202.66  
197.48

139.82  
139.18  
135.08  
129.48  
128.28  
129.00  
127.95  
127.84

77.28  
77.03  
76.77

60.49  
54.64  
45.53  
42.69  
32.85  
30.50  
25.90

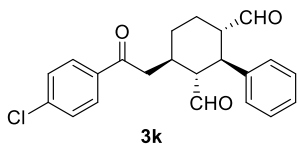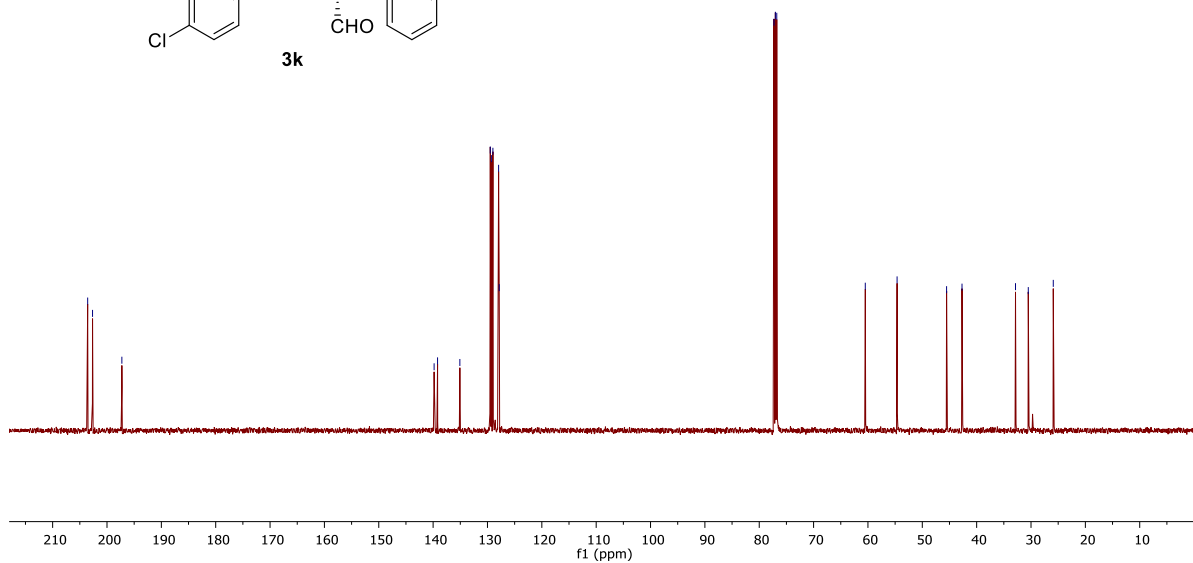

1-rp-2106-ppm

9.45  
9.45  
9.39  
9.39  
7.81  
7.79  
7.63  
7.61  
7.53  
7.31  
7.28  
7.24  
7.24  
7.24  
7.22  
3.22  
3.20  
3.18  
3.09  
3.09  
3.06  
3.05  
2.82  
2.81  
2.79  
2.77  
2.75  
2.73  
2.73  
2.72  
2.70  
2.58  
2.57  
2.56  
2.55  
2.55  
2.16  
2.15  
2.15  
2.14  
2.14  
2.13  
2.13  
2.12  
2.07  
2.06  
2.05  
2.05  
2.04  
2.03  
2.03  
2.02  
1.64  
1.63  
1.61  
1.61  
1.59  
1.58  
1.40  
1.38  
1.37  
1.36  
1.35

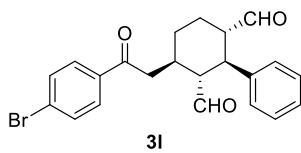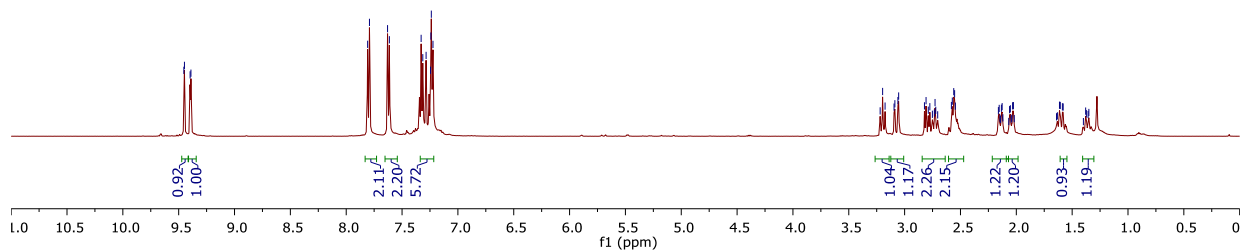

1-rp-2016-ppm

203.55  
202.66  
197.44

139.18  
135.48  
132.00  
129.59  
129.28  
128.56  
127.95  
127.84

77.29  
77.04  
76.78

60.48  
54.63  
45.53  
42.68  
32.84  
30.50  
25.90

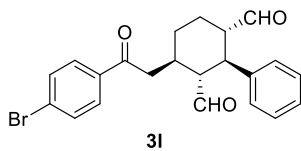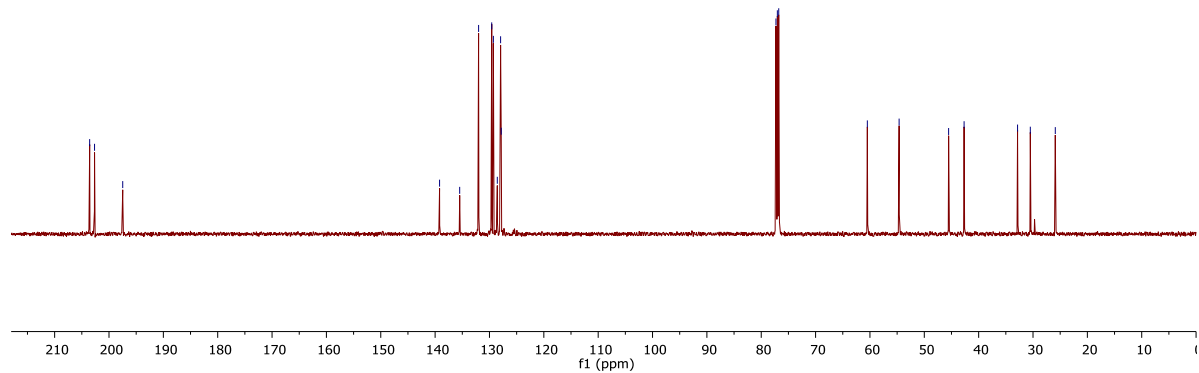



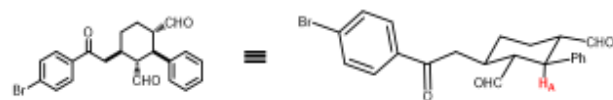

$H_A$   $\delta$  3.19 (t,  $J = 11.1$  Hz, 1H)

2 - axial-axial couplings, substituents must be equatorial

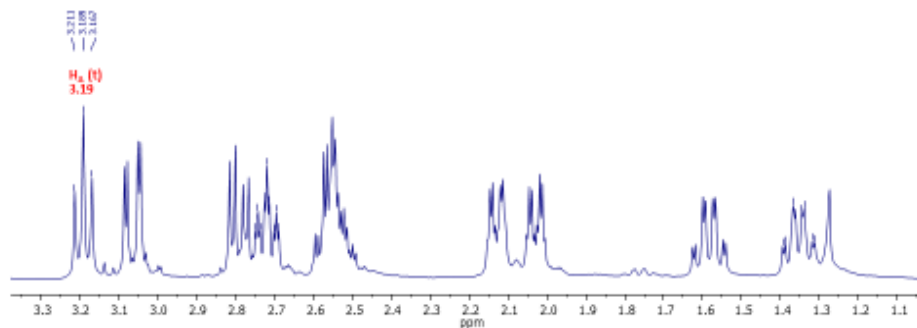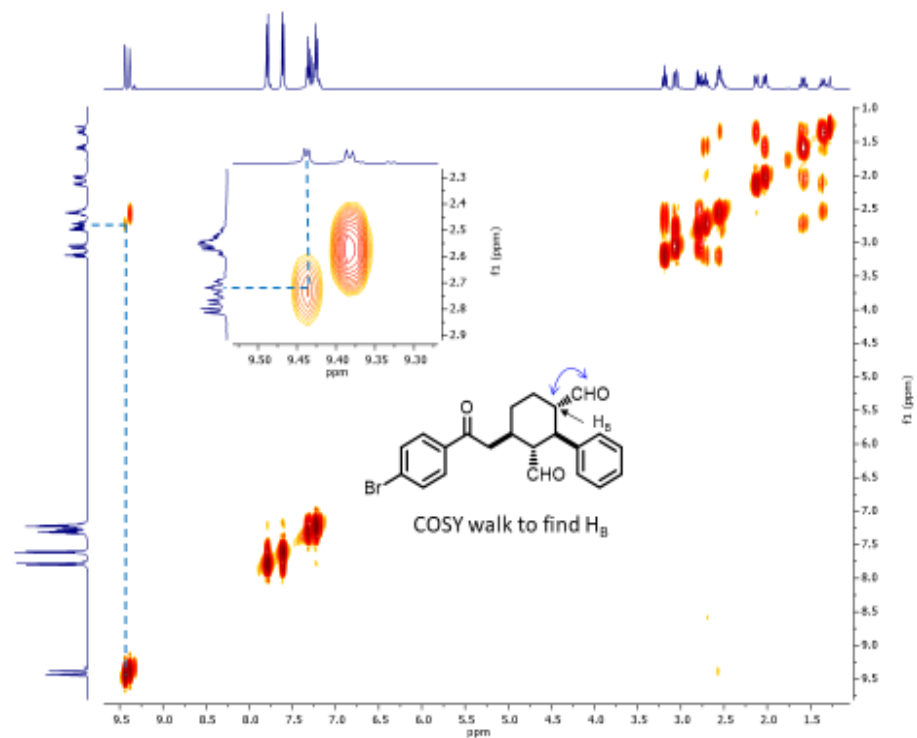

Relative stereochemistry assignment of compound 31

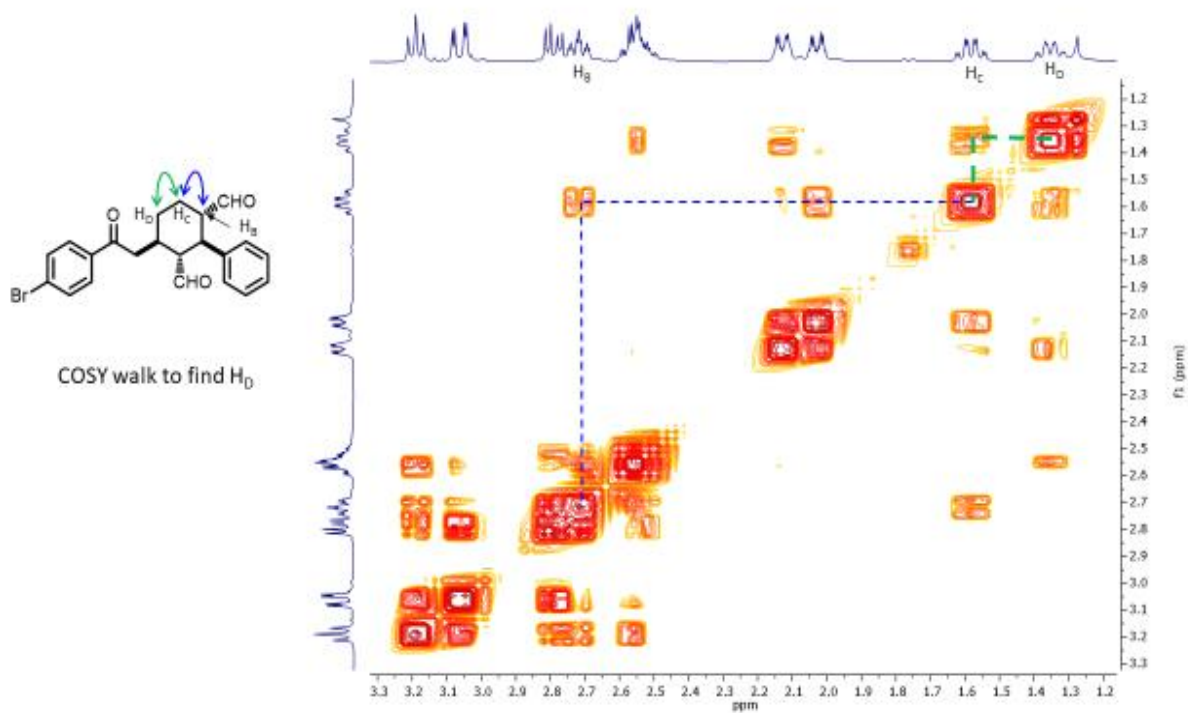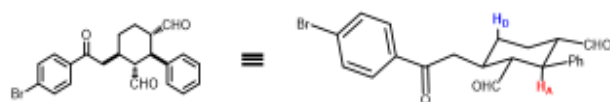

$H_a$   $\delta$  3.19 (t,  $J = 11.1$  Hz, 1H)

2 - axial-axial couplings, substituents must be equatorial

$H_b$  1.35 (qd,  $J = 13.3, 3.6$  Hz, 1H)

2 - axial-axial couplings and 1 geminal coupling for large quartet, substituent must be equatorial  
small doublet from axial-equatorial coupling

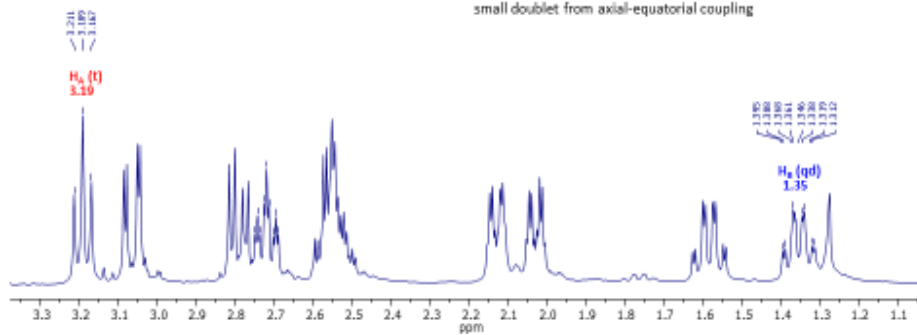

### Relative stereochemistry assignment of compound 3

9.41  
9.38  
9.36  
9.34  
8.97  
8.95  
8.17  
8.15  
7.86  
7.86  
7.85  
7.85  
7.85  
7.72  
7.72  
7.72  
7.72  
7.71  
7.71  
7.70  
7.70  
7.58  
7.56  
7.55  
7.55  
7.34  
7.34  
7.33  
7.33  
7.32  
7.32  
7.28  
7.26  
7.26  
7.25  
7.24  
7.24  
7.23  
7.23  
7.23  
3.21  
3.18  
3.10  
3.09  
3.07  
3.06  
2.85  
2.83  
2.81  
2.80  
2.73  
2.73  
2.58  
2.57  
2.57  
2.56  
2.56  
2.17  
2.16  
2.14  
2.13  
2.07  
2.06  
2.04  
2.03  
1.62  
1.62  
1.60  
1.59  
1.59  
1.28

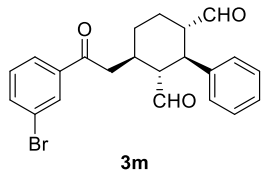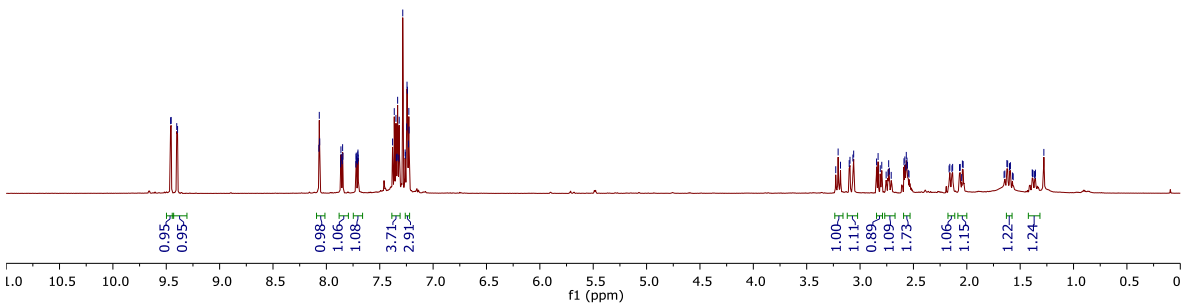

1-rp-2230-0002.fid  
203.80  
202.68  
197.89

139.18  
138.49  
136.16  
131.14  
130.27  
129.28  
127.96  
127.84  
126.57  
123.06

77.27  
77.02  
76.76

60.44  
54.64  
45.52  
42.79

32.76  
30.51  
25.90

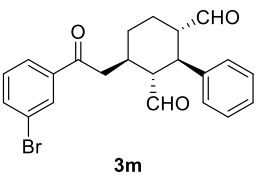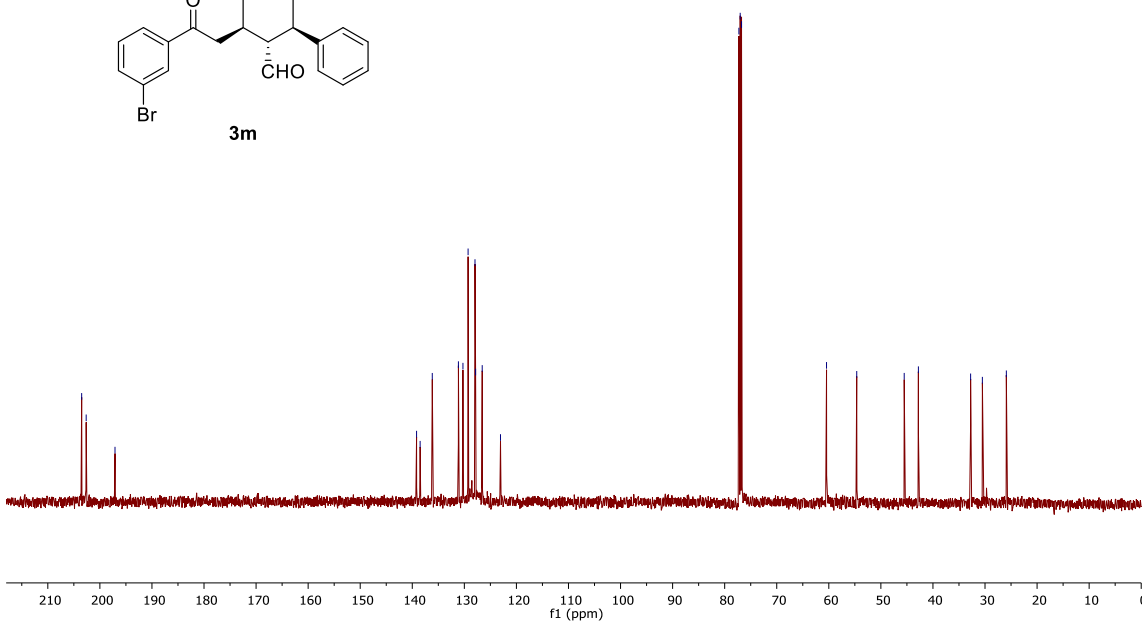

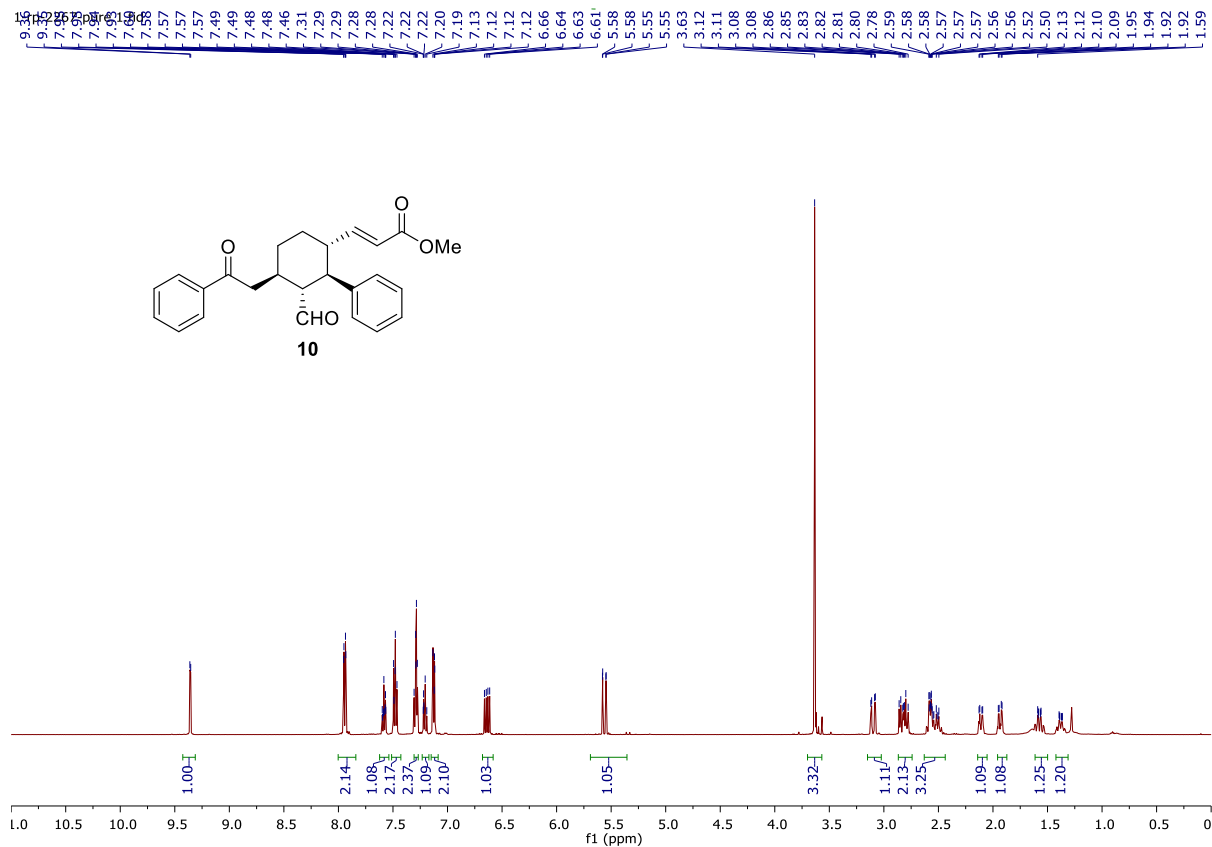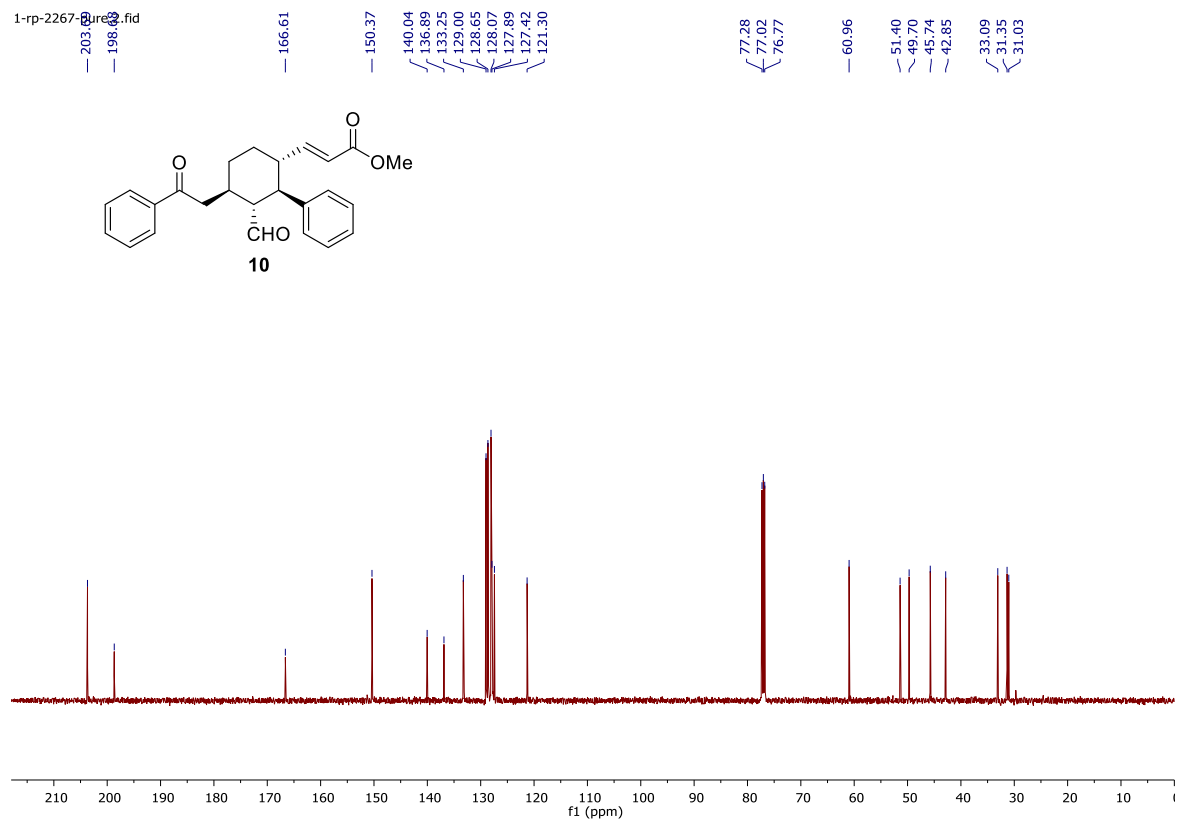

7.91, 7.89, 7.87, 7.85, 7.83, 7.81, 7.79, 7.47, 7.46, 7.28, 7.25, 7.23, 7.22, 7.15, 7.14, 7.14, 7.02, 7.01, 6.64, 6.62, 6.61, 6.59, 6.55, 6.53, 6.52, 6.50, 5.55, 5.55, 5.52, 5.52, 5.36, 5.33, 3.62, 3.57, 3.08, 3.08, 3.05, 3.04, 2.78, 2.76, 2.75, 2.73, 2.51, 2.47, 2.45, 2.43, 2.35, 2.33, 2.10, 2.09, 2.07, 2.06, 1.93, 1.90, 1.90, 1.87, 1.57, 1.55, 1.55, 1.54, 1.37, 1.36, 1.34, 1.34

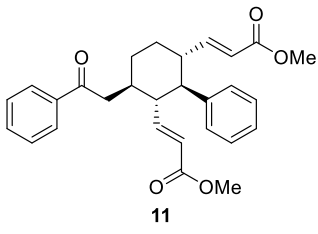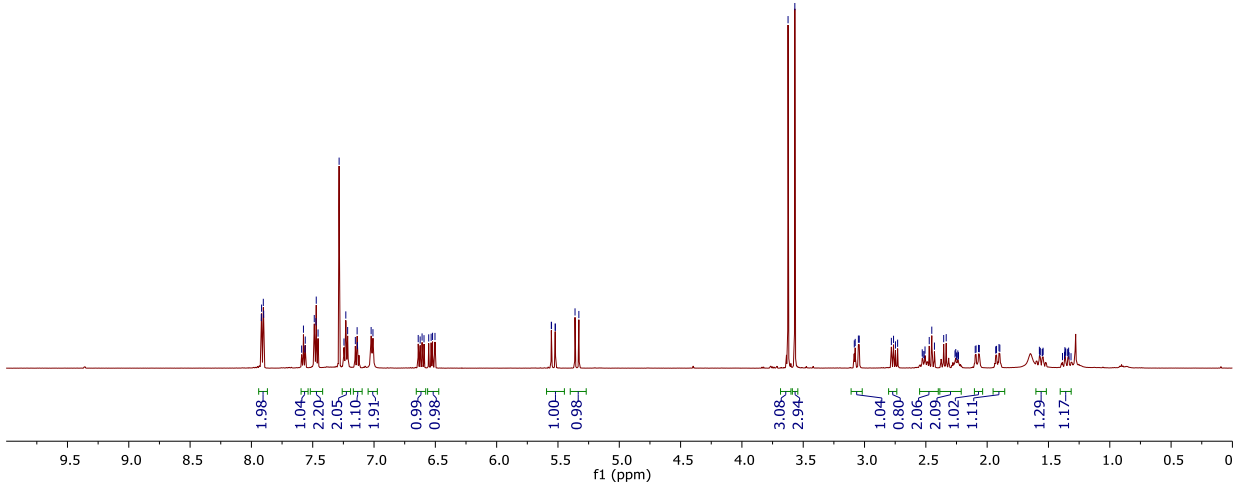

1-rp-2270-pure2.fid

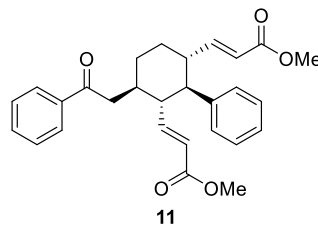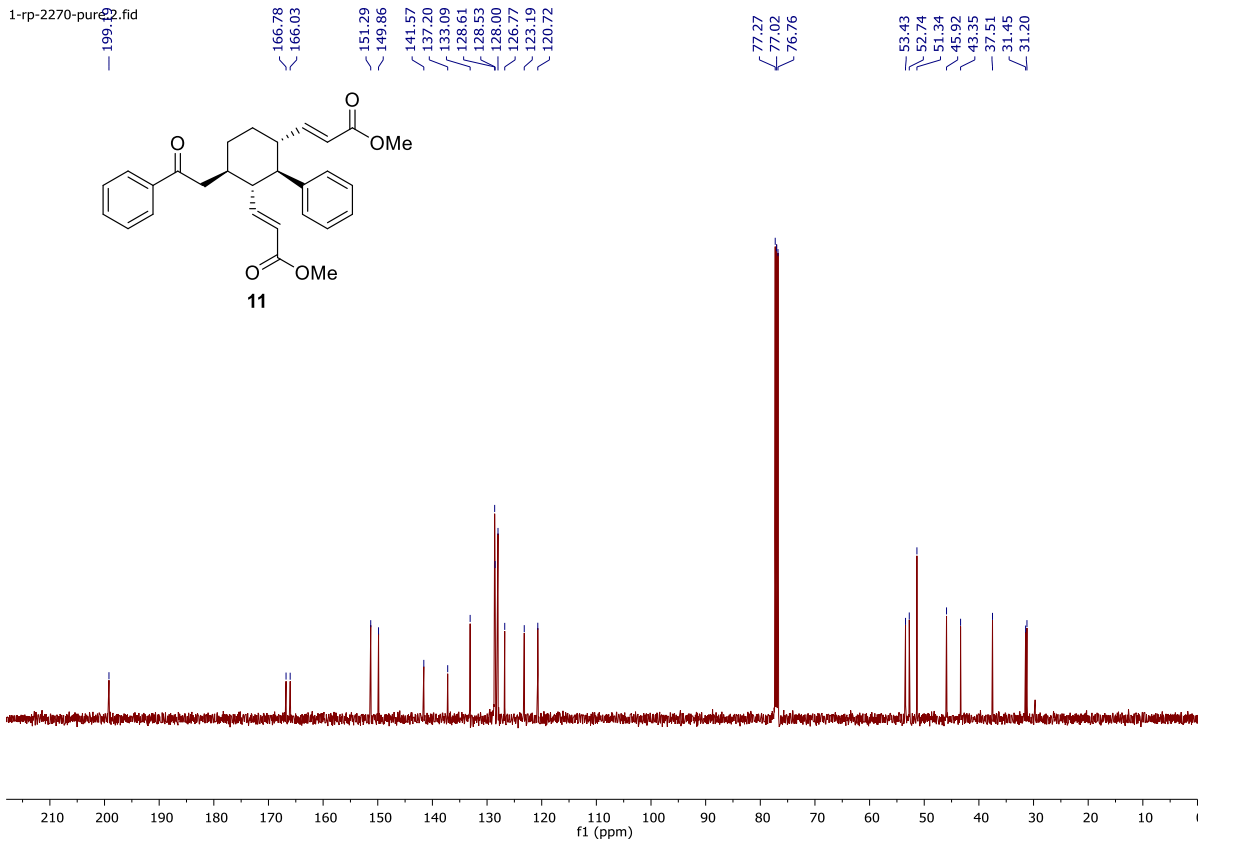

==== Shimadzu LCsolution Analysis Report ====

C:\LabSolutions\LCsolution\1-RP-1687-PURE.lcd  
 Acquired by : Admin  
 Sample Name :  
 Sample ID :  
 Vial # :  
 Injection Volume : 1 uL  
 Data File Name : 1-RP-1687-PURE.lcd  
 Method File Name : ChiralPak IC-30.0%-1.0 mL-254nm.lcm  
 Batch File Name :  
 Report File Name : Default.lcr  
 Data Acquired : 10/1/2019 12:52:08 PM  
 Data Processed : 10/1/2019 1:20:20 PM

<Chromatogram>

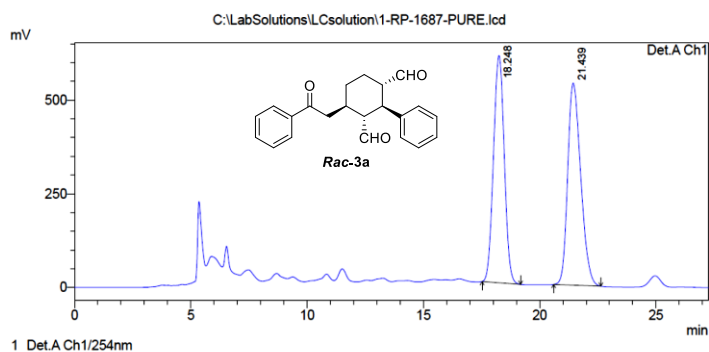

PeakTable

| Peak# | Ret. Time | Area     | Height  | Area %  | Height % |
|-------|-----------|----------|---------|---------|----------|
| 1     | 18.248    | 19604482 | 606349  | 48.285  | 52.939   |
| 2     | 21.439    | 20997316 | 539026  | 51.715  | 47.061   |
| Total |           | 40601798 | 1145374 | 100.000 | 100.000  |

HPLC of racemic 3a

==== Shimadzu LCsolution Analysis Report ====

C:\LabSolutions\LCsolution\1-RP-1676-PURE.lcd  
 Acquired by : Admin  
 Sample Name :  
 Sample ID :  
 Vial # :  
 Injection Volume : 1 uL  
 Data File Name : 1-RP-1676-PURE.lcd  
 Method File Name : ChiralPak IC-30.0%-1.0 mL-254nm.lcm  
 Batch File Name :  
 Report File Name : Default.lcr  
 Data Acquired : 9/30/2019 9:00:20 AM  
 Data Processed : 8/28/2020 1:30:54 PM

<Chromatogram>

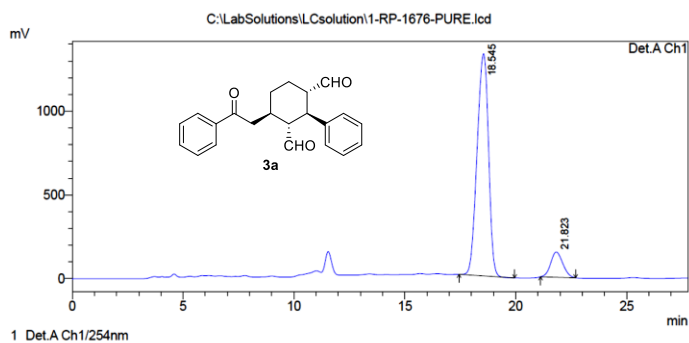

PeakTable

| Peak# | Ret. Time | Area     | Height  | Area %  | Height % |
|-------|-----------|----------|---------|---------|----------|
| 1     | 18.545    | 47552058 | 1326525 | 89.259  | 89.801   |
| 2     | 21.823    | 5722264  | 150662  | 10.741  | 10.199   |
| Total |           | 53274322 | 1477187 | 100.000 | 100.000  |

HPLC of 3a

==== Shimadzu LCsolution Analysis Report ====

Acquired by : Admin  
 Sample Name :  
 Sample ID :  
 Vial # :  
 Injection Volume : 1 uL  
 Data File Name : 1-rp-2339-pure.lcd  
 Method File Name : ChiralPak IC-30.0%-1.0 mL-254nm.lcm  
 Batch File Name :  
 Report File Name : Default.lcr  
 Data Acquired : 9/22/2020 10:34:13 AM  
 Data Processed : 9/22/2020 11:11:35 AM

<Chromatogram>

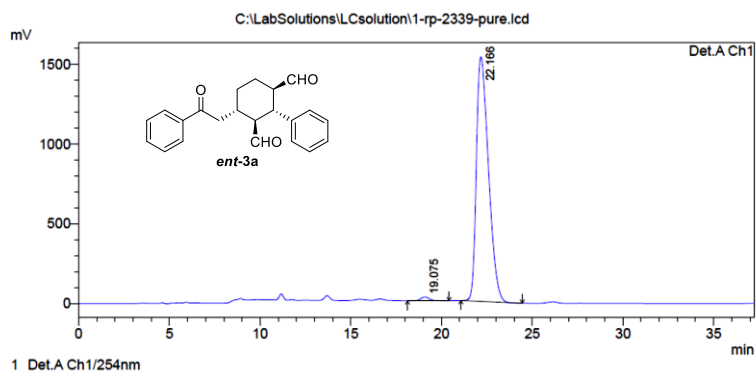

PeakTable

| Peak# | Ret. Time | Area     | Height  | Area %  | Height % |
|-------|-----------|----------|---------|---------|----------|
| 1     | 19.075    | 784257   | 23960   | 1.091   | 1.537    |
| 2     | 22.166    | 71114163 | 1534921 | 98.909  | 98.463   |
| Total |           | 71898419 | 1558881 | 100.000 | 100.000  |

HPLC of *ent-3a* obtained by using the Xu's catalytic system:

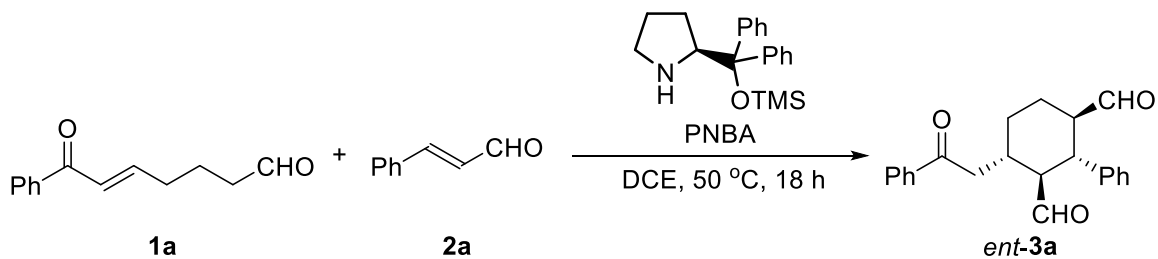

==== Shimadzu LCsolution Analysis Report ====

Acquired by : Admin  
 Sample Name :  
 Sample ID :  
 Vial # :  
 Injection Volume : 1 uL  
 Data File Name : 1-RP-2088-C2-PURE.lcd  
 Method File Name : ChiralPak IC-30.0%-1.0 mL-254nm.lcm  
 Batch File Name :  
 Report File Name : Default.lcr  
 Data Acquired : 3/9/2020 11:01:36 AM  
 Data Processed : 3/9/2020 3:19:30 PM

<Chromatogram>

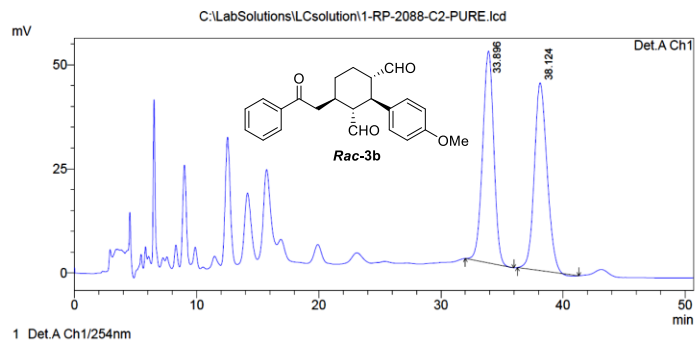

PeakTable

| Peak# | Ret. Time | Area    | Height | Area %  | Height % |
|-------|-----------|---------|--------|---------|----------|
| 1     | 33.896    | 3225498 | 50860  | 49.799  | 53.022   |
| 2     | 38.124    | 3251525 | 45062  | 50.201  | 46.978   |
| Total |           | 6477022 | 95922  | 100.000 | 100.000  |

HPLC of racemic 3b

==== Shimadzu LCsolution Analysis Report ====

Acquired by : Admin  
 Sample Name :  
 Sample ID :  
 Vial # :  
 Injection Volume : 1 uL  
 Data File Name : 1-RP-2095-PURE.lcd  
 Method File Name : ChiralPak IC-30.0%-1.0 mL-254nm.lcm  
 Batch File Name :  
 Report File Name : Default.lcr  
 Data Acquired : 3/13/2020 11:28:43 AM  
 Data Processed : 3/17/2020 9:38:00 AM

<Chromatogram>

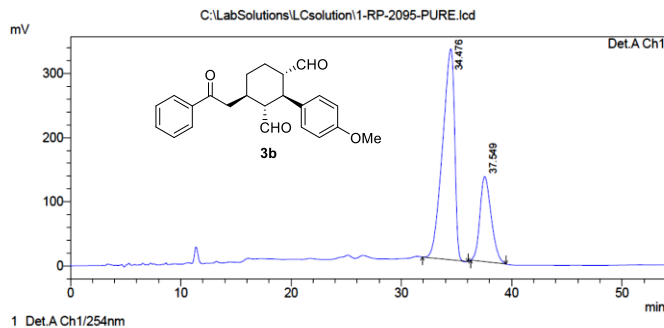

PeakTable

| Peak# | Ret. Time | Area     | Height | Area %  | Height % |
|-------|-----------|----------|--------|---------|----------|
| 1     | 34.476    | 24895414 | 329444 | 72.477  | 71.265   |
| 2     | 37.549    | 9453943  | 132839 | 27.523  | 28.735   |
| Total |           | 34349357 | 462283 | 100.000 | 100.000  |

HPLC of 3b



==== Shimadzu LCsolution Analysis Report ====

Acquired by : Admin  
 Sample Name :  
 Sample ID :  
 Vial # :  
 Injection Volume : 1 uL  
 Data File Name : 1-RP-2087-PURE.lcd  
 Method File Name : ChiralPak IC-30.0%-1.0 mL-254nm.lcm  
 Batch File Name :  
 Report File Name : Default.lcr  
 Data Acquired : 3/9/2020 11:52:40 AM  
 Data Processed : 3/9/2020 3:20:01 PM

<Chromatogram>

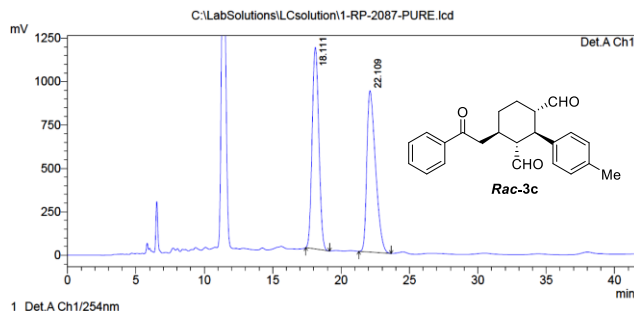

PeakTable

| Peak# | Ret. Time | Area     | Height  | Area %  | Height % |
|-------|-----------|----------|---------|---------|----------|
| 1     | 18.111    | 39691542 | 1161294 | 49.160  | 55.541   |
| 2     | 22.109    | 41048378 | 929584  | 50.840  | 44.459   |
| Total |           | 80739920 | 2090877 | 100.000 | 100.000  |

HPLC of racemic 3c

==== Shimadzu LCsolution Analysis Report ====

Acquired by : Admin  
 Sample Name :  
 Sample ID :  
 Vial # :  
 Injection Volume : 1 uL  
 Data File Name : 1-RP-2094-PURE.lcd  
 Method File Name : ChiralPak IC-30.0%-1.0 mL-254nm.lcm  
 Batch File Name :  
 Report File Name : Default.lcr  
 Data Acquired : 3/12/2020 10:25:56 AM  
 Data Processed : 3/12/2020 11:33:43 AM

<Chromatogram>

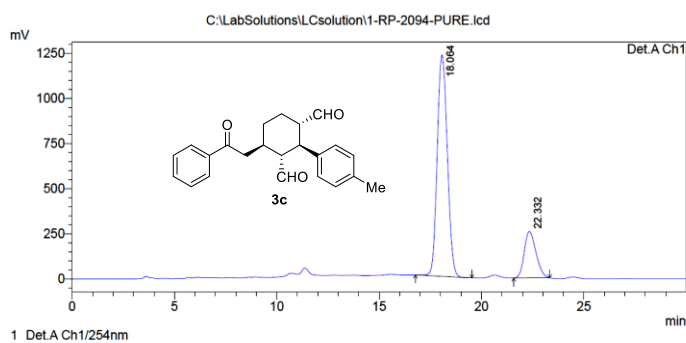

PeakTable

| Peak# | Ret. Time | Area     | Height  | Area %  | Height % |
|-------|-----------|----------|---------|---------|----------|
| 1     | 18.064    | 42199887 | 1227048 | 80.479  | 82.632   |
| 2     | 22.332    | 10236144 | 257901  | 19.521  | 17.368   |
| Total |           | 52436030 | 1484949 | 100.000 | 100.000  |

HPLC of 3c

==== Shimadzu LCsolution Analysis Report ====

C:\LabSolutions\LCsolution\1-RP-2096-PURE-RM-1.lcd  
 Acquired by : Admin  
 Sample Name : baseline  
 Sample ID :  
 Vial # :  
 Injection Volume : 1 uL  
 Data File Name : 1-RP-2096-PURE-RM-1.lcd  
 Method File Name : ChiralPak IC-30.0%-1.0 mL-254nm.lcm  
 Batch File Name :  
 Report File Name : Default.lcr  
 Data Acquired : 6/3/2020 12:01:43 PM  
 Data Processed : 6/3/2020 12:33:16 PM

<Chromatogram>

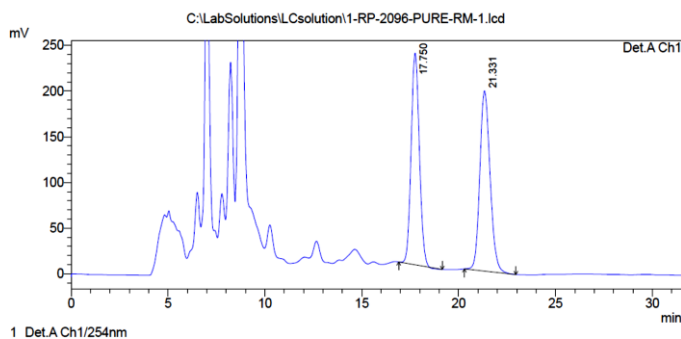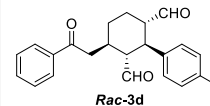

Detector A Ch1 254nm

| Peak# | Ret. Time | Area     | Height | Area %  | Height % |
|-------|-----------|----------|--------|---------|----------|
| 1     | 17.750    | 6848247  | 231994 | 48.437  | 54.036   |
| 2     | 21.331    | 7290299  | 197338 | 51.563  | 45.964   |
| Total |           | 14138546 | 429332 | 100.000 | 100.000  |

HPLC of racemic 3d

==== Shimadzu LCsolution Analysis Report ====

C:\LabSolutions\LCsolution\1-RP-2118-PURE-1.lcd  
 Acquired by : Admin  
 Sample Name : baseline  
 Sample ID :  
 Vial # :  
 Injection Volume : 1 uL  
 Data File Name : 1-RP-2118-PURE-1.lcd  
 Method File Name : ChiralPak IC-30.0%-1.0 mL-254nm.lcm  
 Batch File Name :  
 Report File Name : Default.lcr  
 Data Acquired : 6/3/2020 11:29:22 AM  
 Data Processed : 6/3/2020 12:02:45 PM

<Chromatogram>

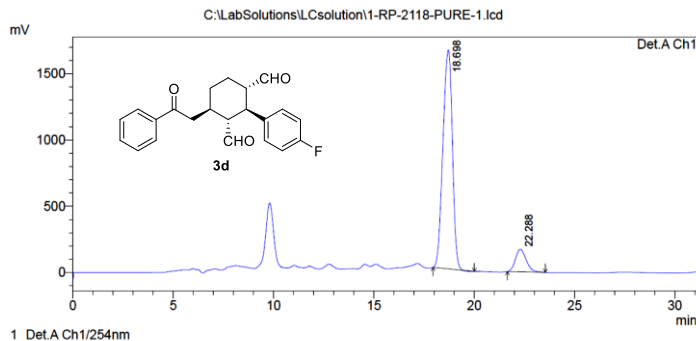

Detector A Ch1 254nm

| Peak# | Ret. Time | Area     | Height  | Area %  | Height % |
|-------|-----------|----------|---------|---------|----------|
| 1     | 18.698    | 54053120 | 1650555 | 89.430  | 90.658   |
| 2     | 22.288    | 6388863  | 170075  | 10.570  | 9.342    |
| Total |           | 60441983 | 1820631 | 100.000 | 100.000  |

HPLC of 3d

==== Shimadzu LCsolution Analysis Report ====

C:\LabSolutions\LCsolution\1-RP-2092-PURE.lcd  
 Acquired by : Admin  
 Sample Name :  
 Sample ID :  
 Vial # :  
 Injection Volume : 1 uL  
 Data File Name : 1-RP-2092-PURE.lcd  
 Method File Name : ChiralPak IC-30.0%-1.0 mL-254nm.lcm  
 Batch File Name :  
 Report File Name : Default.lcr  
 Data Acquired : 3/10/2020 11:27:13 AM  
 Data Processed : 3/10/2020 12:04:37 PM

<Chromatogram>

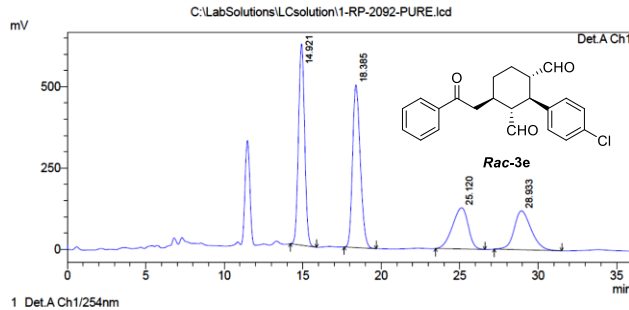

| PeakTable |           |          |         |         |          |
|-----------|-----------|----------|---------|---------|----------|
| Peak#     | Ret. Time | Area     | Height  | Area %  | Height % |
| 1         | 14.921    | 16920203 | 619417  | 32.584  | 45.356   |
| 2         | 18.385    | 17174390 | 499906  | 33.074  | 36.605   |
| 3         | 25.120    | 8830279  | 126713  | 16.986  | 9.278    |
| 4         | 28.933    | 9013032  | 119650  | 17.357  | 8.761    |
| Total     |           | 51927904 | 1365687 | 100.000 | 100.000  |

HPLC of racemic 3e

==== Shimadzu LCsolution Analysis Report ====

C:\LabSolutions\LCsolution\1-RP-2013-PURE-REPEAT.lcd  
 Acquired by : Admin  
 Sample Name :  
 Sample ID :  
 Vial # :  
 Injection Volume : 1 uL  
 Data File Name : 1-RP-2013-PURE-REPEAT.lcd  
 Method File Name : ChiralPak IC-30.0%-1.0 mL-254nm.lcm  
 Batch File Name :  
 Report File Name : Default.lcr  
 Data Acquired : 3/19/2020 11:11:47 AM  
 Data Processed : 3/19/2020 11:47:52 AM

<Chromatogram>

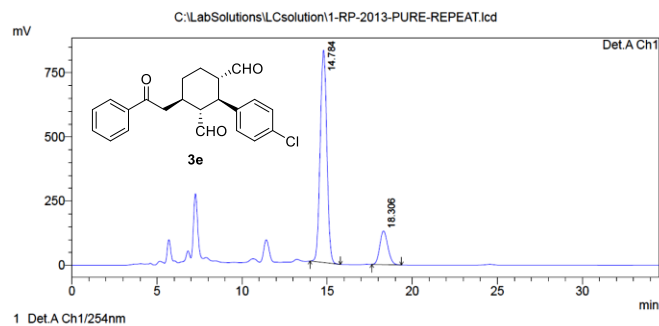

| PeakTable |           |          |        |         |          |
|-----------|-----------|----------|--------|---------|----------|
| Peak#     | Ret. Time | Area     | Height | Area %  | Height % |
| 1         | 14.784    | 22566147 | 826880 | 83.878  | 86.307   |
| 2         | 18.306    | 4337383  | 131184 | 16.122  | 13.693   |
| Total     |           | 26903530 | 958064 | 100.000 | 100.000  |

HPLC of 3e

==== Shimadzu LCsolution Analysis Report ====

Acquired by : Admin  
 Sample Name :  
 Sample ID :  
 Vial # :  
 Injection Volume : 1 uL  
 Data File Name : 1-RP-2265-IC-RM.lcd  
 Method File Name : ChiralPak IC-30.0%-1.0 mL-254nm.lcm  
 Batch File Name :  
 Report File Name : Default.lcr  
 Data Acquired : 8/21/2020 3:07:36 PM  
 Data Processed : 8/21/2020 3:33:21 PM

<Chromatogram>

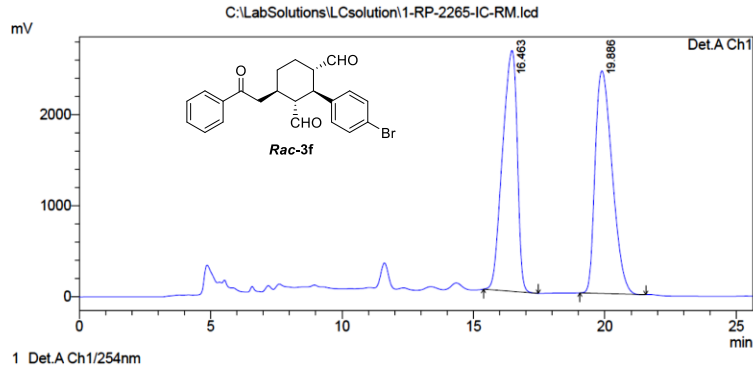

PeakTable

| Peak# | Ret. Time | Area      | Height  | Area %  | Height % |
|-------|-----------|-----------|---------|---------|----------|
| 1     | 16.463    | 102983647 | 2646662 | 48.290  | 51.971   |
| 2     | 19.886    | 110276034 | 2445956 | 51.710  | 48.029   |
| Total |           | 213259682 | 5092617 | 100.000 | 100.000  |

HPLC of racemic 3f

==== Shimadzu LCsolution Analysis Report ====

Acquired by : Admin  
 Sample Name :  
 Sample ID :  
 Vial # :  
 Injection Volume : 1 uL  
 Data File Name : 1-RP-2266-PURE-11.lcd  
 Method File Name : ChiralPak IC-30.0%-1.0 mL-254nm.lcm  
 Batch File Name :  
 Report File Name : Default.lcr  
 Data Acquired : 8/21/2020 4:28:43 PM  
 Data Processed : 8/24/2020 9:44:46 AM

<Chromatogram>

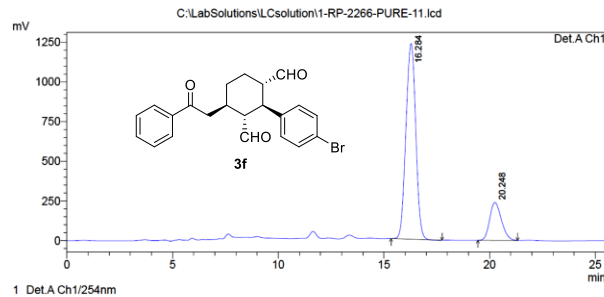

PeakTable

| Peak# | Ret. Time | Area     | Height  | Area %  | Height % |
|-------|-----------|----------|---------|---------|----------|
| 1     | 16.284    | 39811360 | 1232791 | 81.214  | 83.773   |
| 2     | 20.248    | 9208904  | 238792  | 18.786  | 16.227   |
| Total |           | 49020265 | 1471583 | 100.000 | 100.000  |

HPLC of 3f

==== Shimadzu LCsolution Analysis Report ====

C:\LabSolutions\LCsolution\1-RP-2097RMM.lcd  
 Acquired by : Admin  
 Sample Name : baseline  
 Sample ID :  
 Vial # :  
 Injection Volume : 1 uL  
 Data File Name : 1-RP-2097RMM.lcd  
 Method File Name : ChiralPak ID-40%-1.0 mL-254nm.lcm  
 Batch File Name :  
 Report File Name : Default.lcr  
 Data Acquired : 6/4/2020 11:34:52 AM  
 Data Processed : 6/4/2020 12:38:02 PM

<Chromatogram>

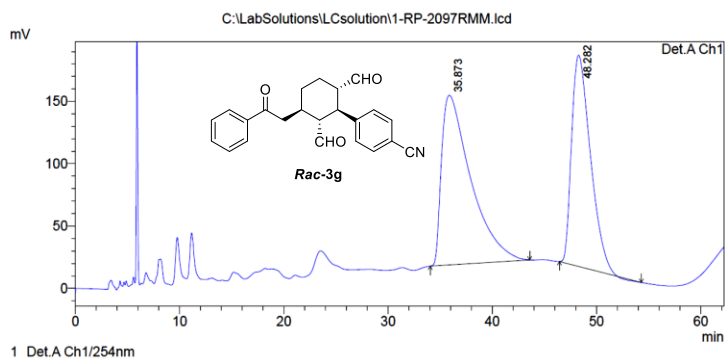

PeakTable

| Peak# | Ret. Time | Area     | Height | Area %  | Height % |
|-------|-----------|----------|--------|---------|----------|
| 1     | 35.873    | 26645845 | 136126 | 55.499  | 44.532   |
| 2     | 48.282    | 21365452 | 169556 | 44.501  | 55.468   |
| Total |           | 48011297 | 305682 | 100.000 | 100.000  |

HPLC of racemic 3g

==== Shimadzu LCsolution Analysis Report ====

C:\LabSolutions\LCsolution\1-RP-2119-CHIRAL.lcd  
 Acquired by : Admin  
 Sample Name : baseline  
 Sample ID :  
 Vial # :  
 Injection Volume : 1 uL  
 Data File Name : 1-RP-2119-CHIRAL.lcd  
 Method File Name : ChiralPak ID-40%-1.0 mL-254nm.lcm  
 Batch File Name :  
 Report File Name : Default.lcr  
 Data Acquired : 6/4/2020 1:59:07 PM  
 Data Processed : 6/4/2020 3:02:11 PM

<Chromatogram>

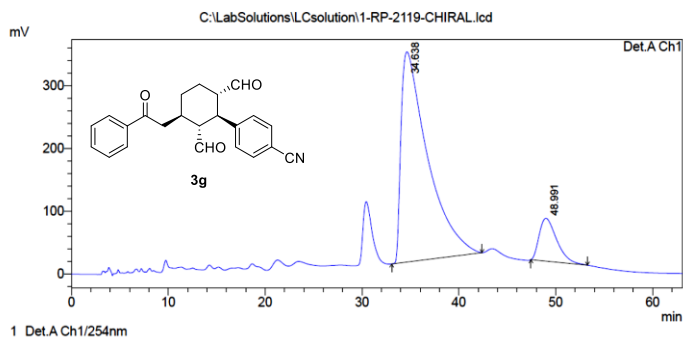

PeakTable

| Peak# | Ret. Time | Area     | Height | Area %  | Height % |
|-------|-----------|----------|--------|---------|----------|
| 1     | 34.638    | 63957369 | 334991 | 88.165  | 83.051   |
| 2     | 48.991    | 8585128  | 68364  | 11.835  | 16.949   |
| Total |           | 72542497 | 403355 | 100.000 | 100.000  |

HPLC of 3g

==== Shimadzu LCsolution Analysis Report ====

Acquired by : Admin  
 Sample Name :  
 Sample ID :  
 Vial # :  
 Injection Volume : 1 uL  
 Data File Name : 1-rp-2134-ic-11.lcd  
 Method File Name : ChiralPak IC 40%-1.0 mL-254nm.lcm  
 Batch File Name :  
 Report File Name : Default.lcr  
 Data Acquired : 7/16/2020 10:41:13 AM  
 Data Processed : 7/16/2020 11:41:17 AM

<Chromatogram>

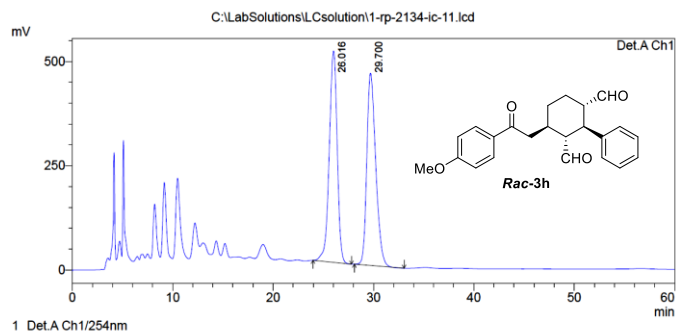

PeakTable

| Peak# | Ret. Time | Area     | Height | Area %  | Height % |
|-------|-----------|----------|--------|---------|----------|
| 1     | 26.016    | 27897036 | 507174 | 49.507  | 52.359   |
| 2     | 29.700    | 28453183 | 461479 | 50.493  | 47.641   |
| Total |           | 56350219 | 968653 | 100.000 | 100.000  |

HPLC of racemic 3h

==== Shimadzu LCsolution Analysis Report ====

Acquired by : Admin  
 Sample Name :  
 Sample ID :  
 Vial # :  
 Injection Volume : 1 uL  
 Data File Name : 1-rp-2193-pure.lcd  
 Method File Name : ChiralPak IC-40%-1 mL-254nm.lcm  
 Batch File Name :  
 Report File Name : Default.lcr  
 Data Acquired : 7/20/2020 3:25:57 PM  
 Data Processed : 7/20/2020 4:06:02 PM

<Chromatogram>

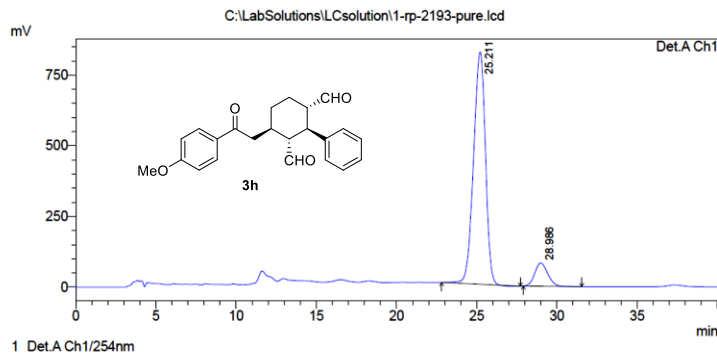

PeakTable

| Peak# | Ret. Time | Area     | Height | Area %  | Height % |
|-------|-----------|----------|--------|---------|----------|
| 1     | 25.211    | 42241214 | 821392 | 90.173  | 90.904   |
| 2     | 28.986    | 4603643  | 82191  | 9.827   | 9.096    |
| Total |           | 46844857 | 903583 | 100.000 | 100.000  |

HPLC of 3h

==== Shimadzu LCsolution Analysis Report ====

Acquired by : Admin  
 Sample Name :  
 Sample ID :  
 Vial # :  
 Injection Volume : 1 uL  
 Data File Name : 1-rp-2133-pure.lcd  
 Method File Name : ChiralPak ID-40%-1.0 mL-254nm.lcm  
 Batch File Name :  
 Report File Name : Default.lcr  
 Data Acquired : 7/16/2020 2:35:09 PM  
 Data Processed : 7/24/2020 10:04:32 AM

<Chromatogram>

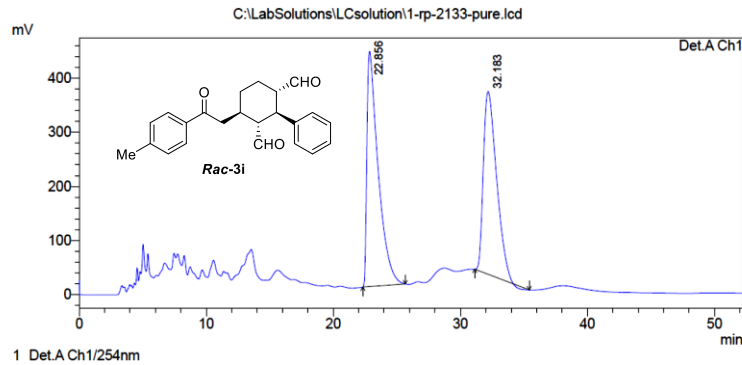

| Peak# | Ret. Time | Area     | Height | Area %  | Height % |
|-------|-----------|----------|--------|---------|----------|
| 1     | 22.856    | 26693989 | 434202 | 52.341  | 56.263   |
| 2     | 32.183    | 24305891 | 337536 | 47.659  | 43.737   |
| Total |           | 50999880 | 771738 | 100.000 | 100.000  |

HPLC of racemic 3i

==== Shimadzu LCsolution Analysis Report ====

Acquired by : Admin  
 Sample Name :  
 Sample ID :  
 Vial # :  
 Injection Volume : 1 uL  
 Data File Name : 1-rp-2203-pure-4-me.lcd  
 Method File Name : ChiralPak ID-40%-1 mL-254nm.lcm  
 Batch File Name :  
 Report File Name : Default.lcr  
 Data Acquired : 7/24/2020 10:55:07 AM  
 Data Processed : 7/24/2020 11:42:21 AM

<Chromatogram>

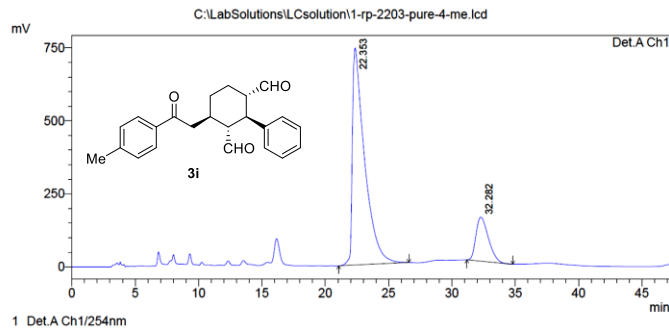

| Peak# | Ret. Time | Area     | Height | Area %  | Height % |
|-------|-----------|----------|--------|---------|----------|
| 1     | 22.353    | 49911331 | 743044 | 82.911  | 83.165   |
| 2     | 32.282    | 10287335 | 150416 | 17.089  | 16.835   |
| Total |           | 60198666 | 893460 | 100.000 | 100.000  |

HPLC of 3i

==== Shimadzu LCsolution Analysis Report ====

C:\LabSolutions\LCsolution\1-RP-2129-PURE.lcd  
 Acquired by : Admin  
 Sample Name : baseline  
 Sample ID :  
 Vial # :  
 Injection Volume : 1 uL  
 Data File Name : 1-RP-2129-PURE.lcd  
 Method File Name : ChiralPak ID-30.0%-1.0 mL-254nm.lcm  
 Batch File Name :  
 Report File Name : Default.lcr  
 Data Acquired : 6/15/2020 11:21:31 AM  
 Data Processed : 6/15/2020 4:07:10 PM

<Chromatogram>

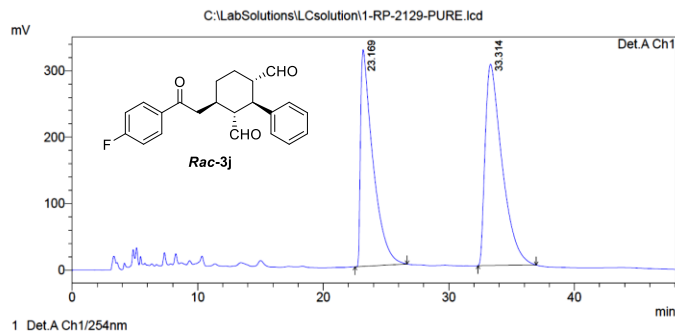

PeakTable

| Peak# | Ret. Time | Area     | Height | Area %  | Height % |
|-------|-----------|----------|--------|---------|----------|
| 1     | 23.169    | 22432180 | 326443 | 44.114  | 51.867   |
| 2     | 33.314    | 28418221 | 302945 | 55.886  | 48.133   |
| Total |           | 50850401 | 629388 | 100.000 | 100.000  |

HPLC of racemic 3j

==== Shimadzu LCsolution Analysis Report ====

C:\LabSolutions\LCsolution\1-RP-2126-PURE.lcd  
 Acquired by : Admin  
 Sample Name : baseline  
 Sample ID :  
 Vial # :  
 Injection Volume : 1 uL  
 Data File Name : 1-RP-2126-PURE.lcd  
 Method File Name : ChiralPak ID-30.0%-1.0 mL-254nm.lcm  
 Batch File Name :  
 Report File Name : Default.lcr  
 Data Acquired : 6/12/2020 3:37:16 PM  
 Data Processed : 6/15/2020 4:08:29 PM

<Chromatogram>

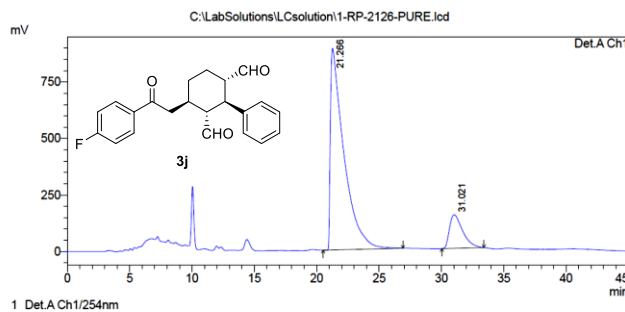

PeakTable

| Peak# | Ret. Time | Area     | Height  | Area %  | Height % |
|-------|-----------|----------|---------|---------|----------|
| 1     | 21.266    | 67302377 | 892398  | 86.046  | 85.702   |
| 2     | 31.021    | 10914799 | 148882  | 13.954  | 14.298   |
| Total |           | 78217176 | 1041280 | 100.000 | 100.000  |

HPLC of 3j



==== Shimadzu LCsolution Analysis Report ====

C:\LabSolutions\LCsolution\1-RP-2130-ID.lcd  
 Acquired by : Admin  
 Sample Name : baseline  
 Sample ID :  
 Vial # :  
 Injection Volume : 1 uL  
 Data File Name : 1-RP-2130-ID.lcd  
 Method File Name : ChiralPak ID-30.0%-1.0 mL-254nm.lcm  
 Batch File Name :  
 Report File Name : Default.lcr  
 Data Acquired : 6/18/2020 2:04:52 PM  
 Data Processed : 6/18/2020 3:01:00 PM

<Chromatogram>

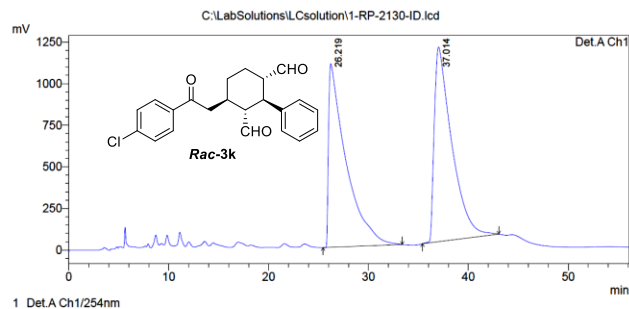

PeakTable

| Peak# | Ret. Time | Area      | Height  | Area %  | Height % |
|-------|-----------|-----------|---------|---------|----------|
| 1     | 26.219    | 133972179 | 1102885 | 48.385  | 48.542   |
| 2     | 37.014    | 142914722 | 1169152 | 51.615  | 51.458   |
| Total |           | 276886901 | 2272037 | 100.000 | 100.000  |

HPLC of racemic 3k

==== Shimadzu LCsolution Analysis Report ====

C:\LabSolutions\LCsolution\1-RP-2131-PURE-CHIRAL.lcd  
 Acquired by : Admin  
 Sample Name : baseline  
 Sample ID :  
 Vial # :  
 Injection Volume : 1 uL  
 Data File Name : 1-RP-2131-PURE-CHIRAL.lcd  
 Method File Name : ChiralPak ID-30.0%-1.0 mL-254nm.lcm  
 Batch File Name :  
 Report File Name : Default.lcr  
 Data Acquired : 6/19/2020 10:14:00 AM  
 Data Processed : 6/19/2020 11:10:27 AM

<Chromatogram>

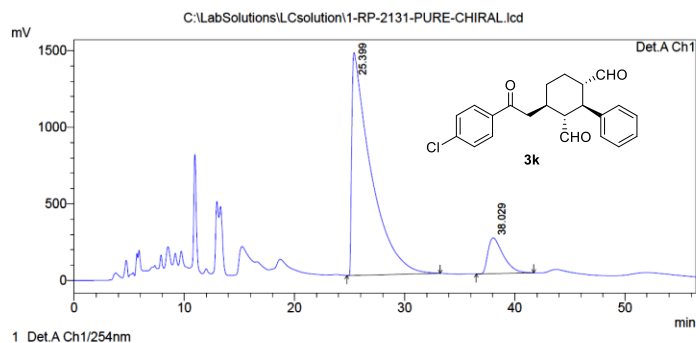

PeakTable

| Peak# | Ret. Time | Area      | Height  | Area %  | Height % |
|-------|-----------|-----------|---------|---------|----------|
| 1     | 25.399    | 175599254 | 1454379 | 88.613  | 86.141   |
| 2     | 38.029    | 22564423  | 233984  | 11.387  | 13.859   |
| Total |           | 198163677 | 1688363 | 100.000 | 100.000  |

HPLC of 3k

==== Shimadzu LCsolution Analysis Report ====

Acquired by : Admin  
 Sample Name : baseline  
 Sample ID :  
 Vial # :  
 Injection Volume : 1 uL  
 Data File Name : 1-RP-2124-RM-PURE.lcd  
 Method File Name : ChiralPak ID-20.0%-1.0 mL-254nm.lcm  
 Batch File Name :  
 Report File Name : Default.lcr  
 Data Acquired : 6/10/2020 11:52:39 AM  
 Data Processed : 6/10/2020 2:11:01 PM

<Chromatogram>

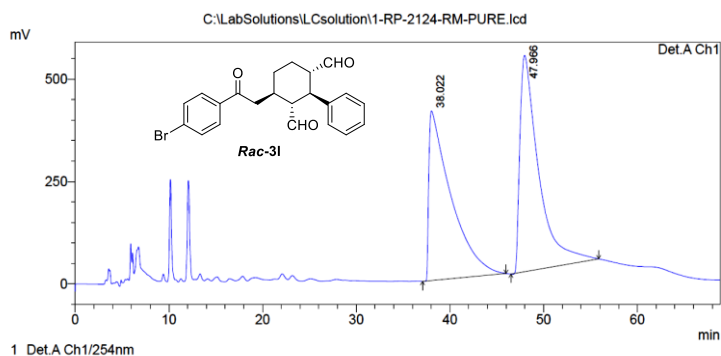

PeakTable

| Peak# | Ret. Time | Area      | Height | Area %  | Height % |
|-------|-----------|-----------|--------|---------|----------|
| 1     | 38.022    | 68060127  | 414164 | 47.980  | 43.961   |
| 2     | 47.966    | 73790837  | 527949 | 52.020  | 56.039   |
| Total |           | 141850964 | 942114 | 100.000 | 100.000  |

HPLC of racemic 3I

==== Shimadzu LCsolution Analysis Report ====

Acquired by : Admin  
 Sample Name : baseline  
 Sample ID :  
 Vial # :  
 Injection Volume : 1 uL  
 Data File Name : 1-RP-2123-C-PURE.lcd  
 Method File Name : ChiralPak ID-20.0%-1.0 mL-254nm.lcm  
 Batch File Name :  
 Report File Name : Default.lcr  
 Data Acquired : 6/10/2020 1:01:55 PM  
 Data Processed : 6/10/2020 2:12:56 PM

<Chromatogram>

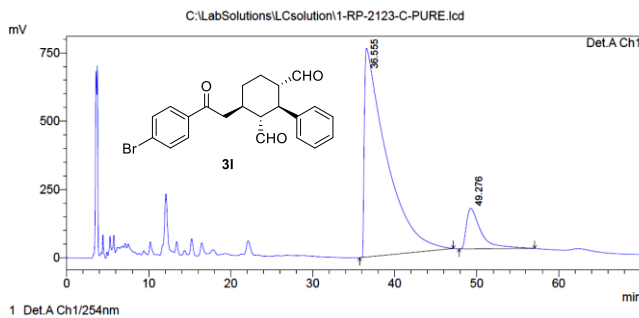

PeakTable

| Peak# | Ret. Time | Area      | Height | Area %  | Height % |
|-------|-----------|-----------|--------|---------|----------|
| 1     | 36.555    | 142940647 | 764211 | 88.599  | 83.790   |
| 2     | 49.276    | 18394634  | 147846 | 11.401  | 16.210   |
| Total |           | 161335281 | 912058 | 100.000 | 100.000  |

HPLC of 3I

==== Shimadzu LCsolution Analysis Report ====

Acquired by : Admin  
 Sample Name :  
 Sample ID :  
 Vial # :  
 Injection Volume : 1 uL  
 Data File Name : 1-RP-2299-PURE-RM.lcd  
 Method File Name : ChiralPak ID-30.0%-1.0 mL-254nm.lcm  
 Batch File Name :  
 Report File Name : Default.lcr  
 Data Acquired : 9/4/2020 2:46:37 PM  
 Data Processed : 9/7/2020 2:06:14 PM

<Chromatogram>

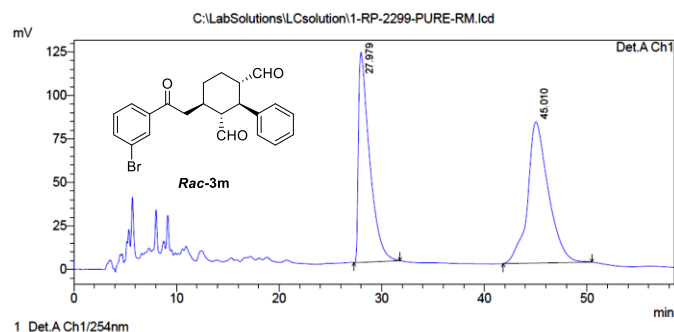

PeakTable

| Peak# | Ret. Time | Area     | Height | Area %  | Height % |
|-------|-----------|----------|--------|---------|----------|
| 1     | 27.979    | 9084693  | 120714 | 44.328  | 59.789   |
| 2     | 45.010    | 11409789 | 81186  | 55.672  | 40.211   |
| Total |           | 20494481 | 201900 | 100.000 | 100.000  |

HPLC of racemic 3m

==== Shimadzu LCsolution Analysis Report ====

Acquired by : Admin  
 Sample Name :  
 Sample ID :  
 Vial # :  
 Injection Volume : 1 uL  
 Data File Name : 1-RP-2300-PURE-CHIRAL.lcd  
 Method File Name : ChiralPak ID-30.0%-1.0 mL-254nm.lcm  
 Batch File Name :  
 Report File Name : Default.lcr  
 Data Acquired : 9/7/2020 1:52:39 PM  
 Data Processed : 9/7/2020 2:54:59 PM

<Chromatogram>

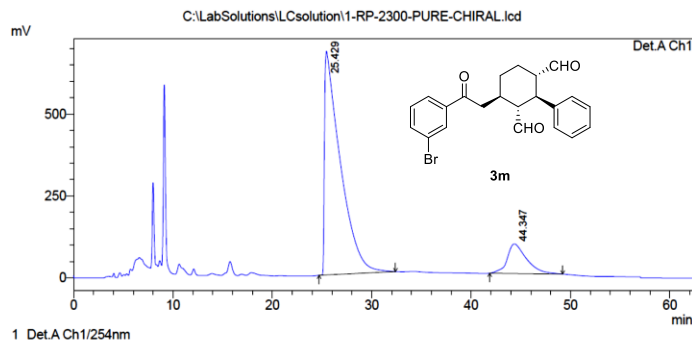

PeakTable

| Peak# | Ret. Time | Area     | Height | Area %  | Height % |
|-------|-----------|----------|--------|---------|----------|
| 1     | 25.429    | 75803084 | 683346 | 86.089  | 88.325   |
| 2     | 44.347    | 12248993 | 90328  | 13.911  | 11.675   |
| Total |           | 88052077 | 773674 | 100.000 | 100.000  |

HPLC of 3m

==== Shimadzu LCsolution Analysis Report ====

Acquired by : Admin  
 Sample Name :  
 Sample ID :  
 Vial # :  
 Injection Volume : 1 uL  
 Data File Name : 1-RP-2268-RM.lcd  
 Method File Name : ChiralPak IC-30.0%-1.0 mL-254nm.lcm  
 Batch File Name :  
 Report File Name : Default.lcr  
 Data Acquired : 8/21/2020 11:56:12 AM  
 Data Processed : 8/21/2020 12:40:29 PM

<Chromatogram>

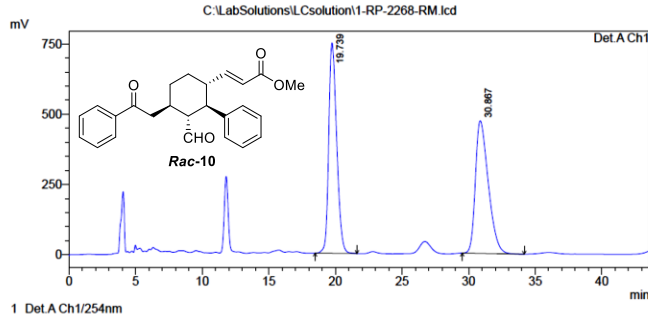

| PeakTable            |           |          |         |         |          |
|----------------------|-----------|----------|---------|---------|----------|
| Detector A Ch1 254nm |           |          |         |         |          |
| Peak#                | Ret. Time | Area     | Height  | Area %  | Height % |
| 1                    | 19.739    | 31121470 | 748912  | 49.534  | 61.340   |
| 2                    | 30.867    | 31707053 | 472014  | 50.466  | 38.660   |
| Total                |           | 62828523 | 1220926 | 100.000 | 100.000  |

HPLC of racemic 10

==== Shimadzu LCsolution Analysis Report ====

Acquired by : Admin  
 Sample Name :  
 Sample ID :  
 Vial # :  
 Injection Volume : 1 uL  
 Data File Name : 1-RP-2267-CHIRAL.lcd  
 Method File Name : ChiralPak IC-30.0%-1.0 mL-254nm.lcm  
 Batch File Name :  
 Report File Name : Default.lcr  
 Data Acquired : 8/21/2020 12:41:26 PM  
 Data Processed : 8/21/2020 1:48:12 PM

<Chromatogram>

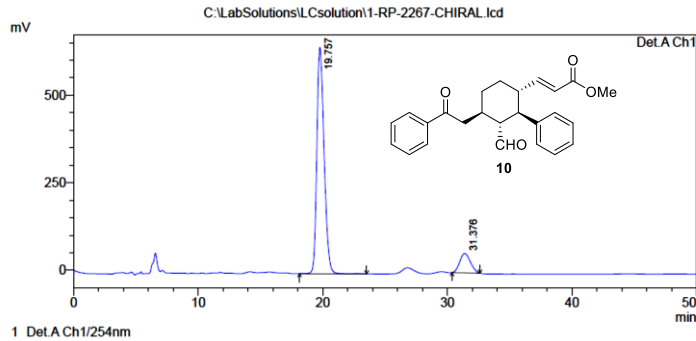

| PeakTable            |           |          |        |         |          |
|----------------------|-----------|----------|--------|---------|----------|
| Detector A Ch1 254nm |           |          |        |         |          |
| Peak#                | Ret. Time | Area     | Height | Area %  | Height % |
| 1                    | 19.757    | 26191817 | 646643 | 88.796  | 92.118   |
| 2                    | 31.376    | 3304958  | 55330  | 11.204  | 7.882    |
| Total                |           | 29496775 | 701972 | 100.000 | 100.000  |

HPLC of 10

==== Shimadzu LCsolution Analysis Report ====

C:\LabSolutions\LCsolution\1-RP-2233-1-PURE-1RM.lcd  
 Acquired by : Admin  
 Sample Name :  
 Sample ID :  
 Vial # :  
 Injection Volume : 1 uL  
 Data File Name : 1-RP-2233-1-PURE-1RM.lcd  
 Method File Name : ChiralPak IC-30.0%-1.0 mL-254nm.lcm  
 Batch File Name :  
 Report File Name : Default.lcr  
 Data Acquired : 8/20/2020 12:37:26 PM  
 Data Processed : 8/20/2020 1:52:34 PM

<Chromatogram>

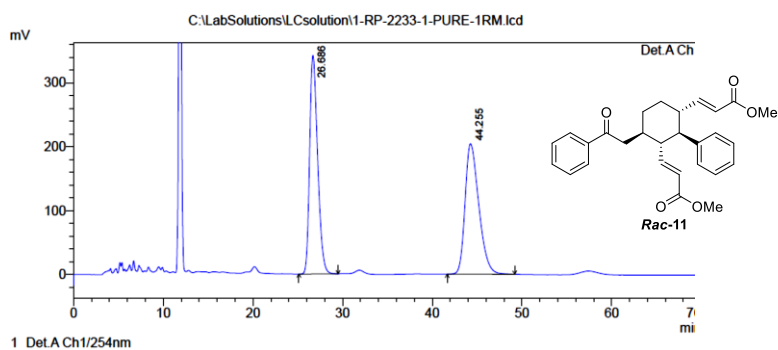

PeakTable

| Peak# | Ret. Time | Area     | Height | Area %  | Height % |
|-------|-----------|----------|--------|---------|----------|
| 1     | 26.686    | 21203762 | 342433 | 49.406  | 62.637   |
| 2     | 44.255    | 21713456 | 204263 | 50.594  | 37.363   |
| Total |           | 42917218 | 546696 | 100.000 | 100.000  |

HPLC of racemic 11

==== Shimadzu LCsolution Analysis Report ====

C:\LabSolutions\LCsolution\1-RP-2270-PURE.lcd  
 Acquired by : Admin  
 Sample Name :  
 Sample ID :  
 Vial # :  
 Injection Volume : 1 uL  
 Data File Name : 1-RP-2270-PURE.lcd  
 Method File Name : ChiralPak IC-30.0%-1.0 mL-254nm.lcm  
 Batch File Name :  
 Report File Name : Default.lcr  
 Data Acquired : 8/24/2020 11:40:50 AM  
 Data Processed : 8/24/2020 12:57:15 PM

<Chromatogram>

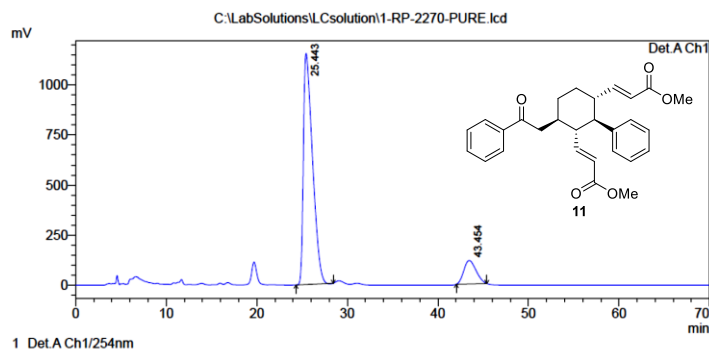

PeakTable

| Peak# | Ret. Time | Area     | Height  | Area %  | Height % |
|-------|-----------|----------|---------|---------|----------|
| 1     | 25.443    | 80454704 | 1153739 | 87.949  | 90.776   |
| 2     | 43.454    | 11024351 | 117240  | 12.051  | 9.224    |
| Total |           | 91479055 | 1270978 | 100.000 | 100.000  |

HPLC of 11
